# Supplementary material
Source: publisher figshare collection journal article supplement (https://acs.figshare.com/ndownloader/files/4749979)

Pulse Sequence: zgpg30

Solvent: CDCl3

Acquisition temperature

File: 1j00657.klms.cry2

INSTR-500 "gndel"

Pulse 45.0 degrees

Acq. time 4.65 sec

Width 7024.9 Hz

Single scan

Observer: EL, 409.6964459 MHz

DATA PROCESSING

FT size 65536

Total time 0 min, 4 sec

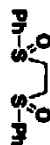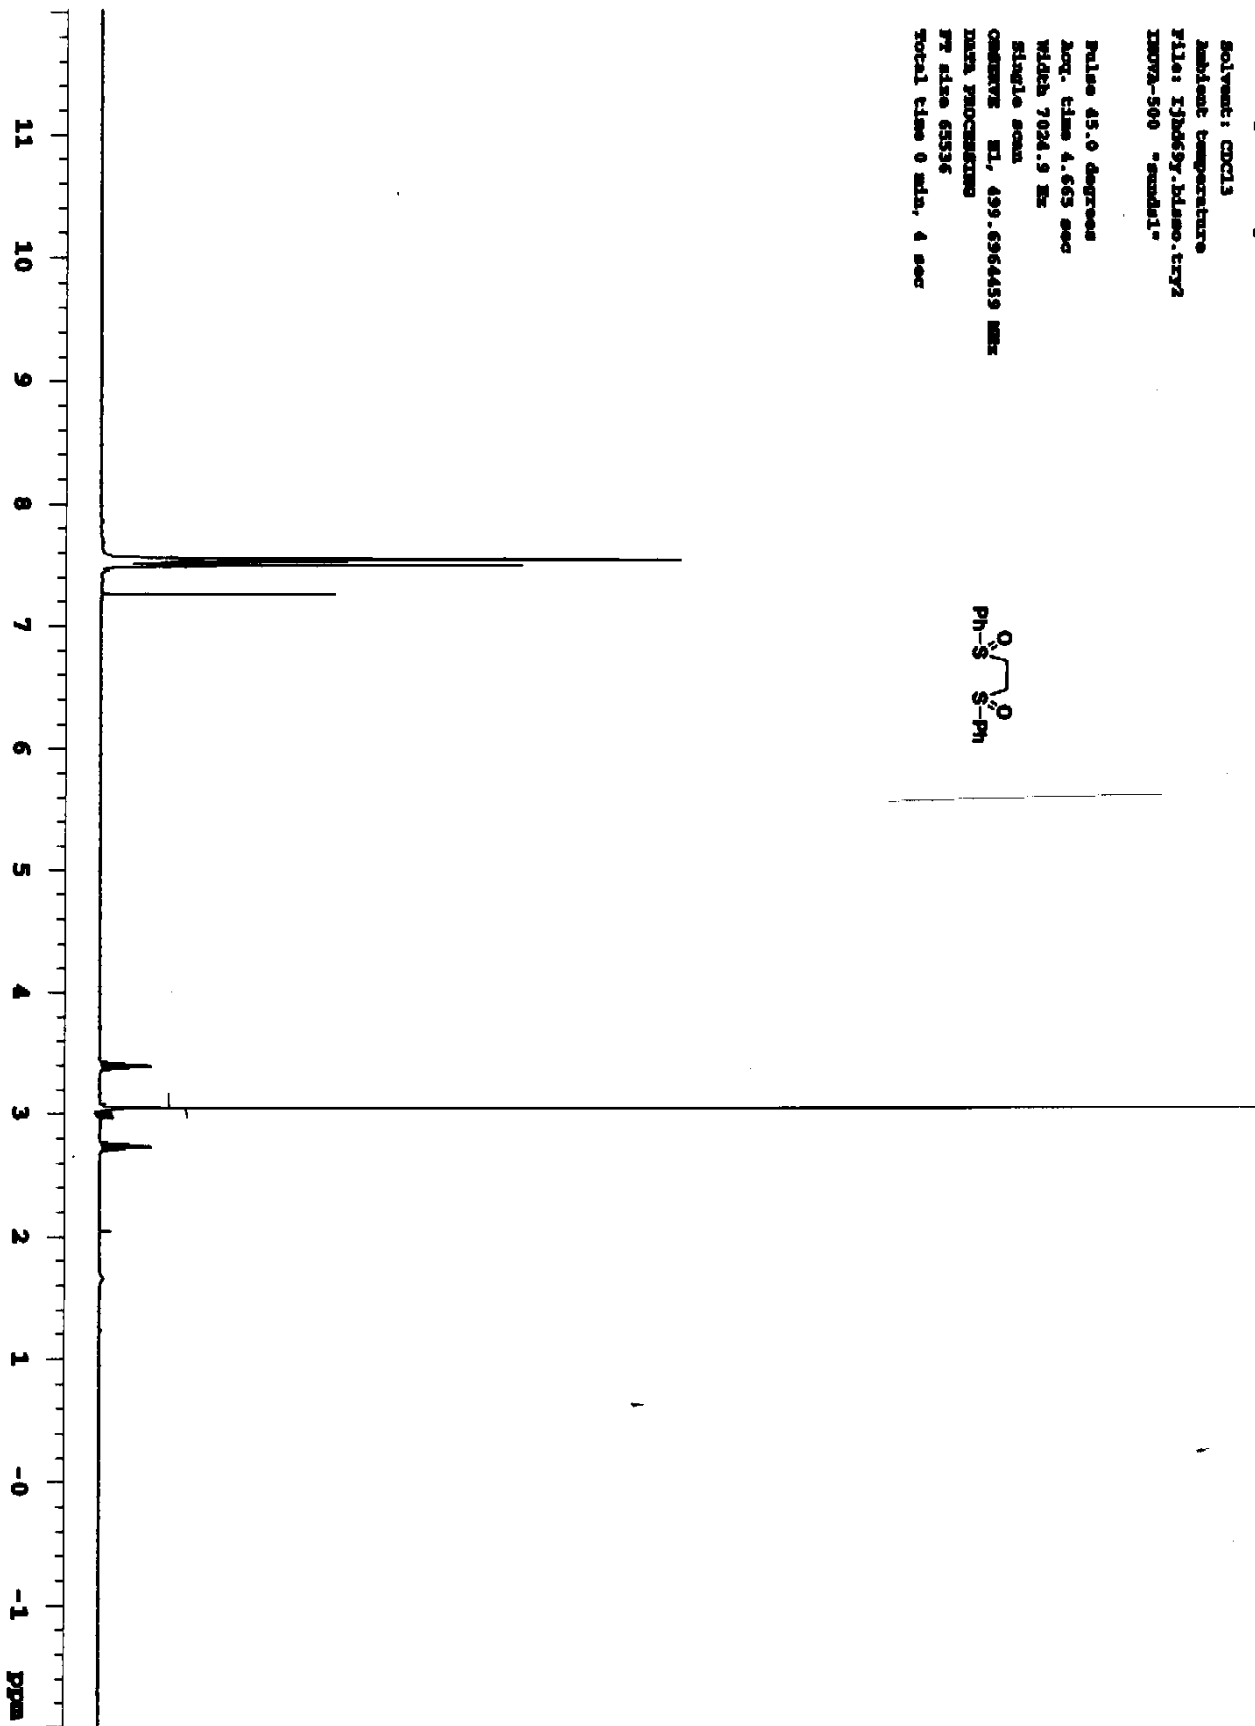

Pulse Sequence: szpul

Solvent: CDCl<sub>3</sub>

Ambient temperature

UNIT-400 "u400"

Relax. delay 3.000 sec

Pulse 45.0 degrees

Acq. time 1.311 sec

Width 25000.0 Hz

64 repetitions

OBSERVE C13, 100.5671568 MHz

DECOUPLE H1, 399.9500118 MHz

Power 48 dB

continuously on

WALTZ-16 modulated

DATA PROCESSING

Line broadening 1.0 Hz

FT size 65536

Total time 1 hr, 12 min, 1 sec

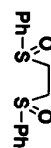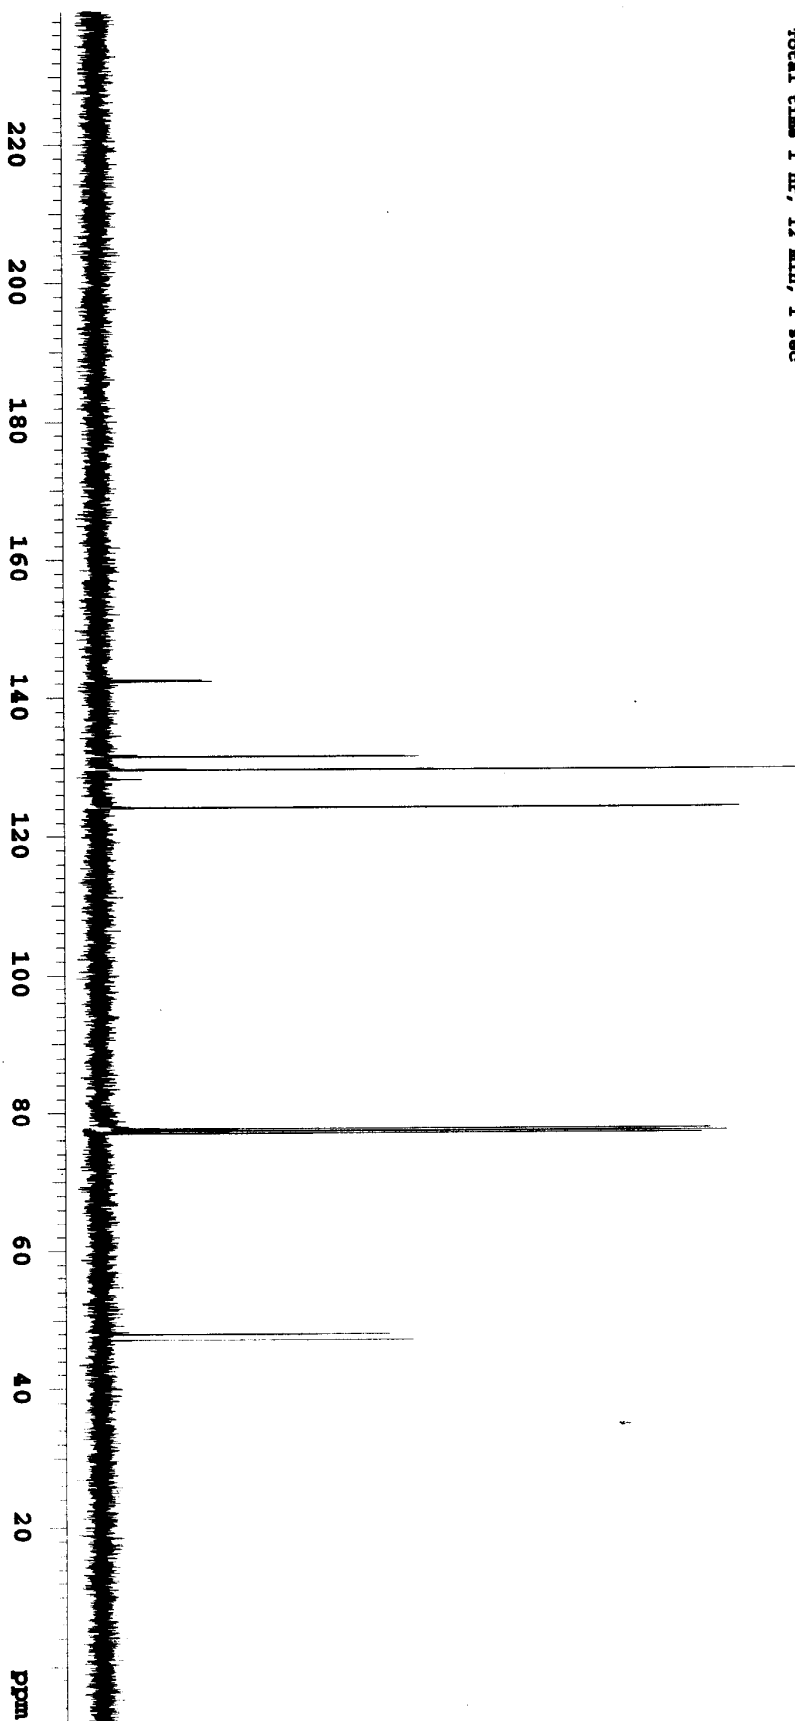

Pulse Sequence: s2pul  
Solvent: CDCl<sub>3</sub>  
Ambient temperature  
UNIRV-400 "u400"

Relax. delay 15.000 sec  
Pulse 45.0 degrees  
Acq. time 4.096 sec  
Width 8000.0 Hz  
8 repetitions  
OBSERVE H1, 399.9486787 MHz  
DATA PROCESSING  
Line broadening 0.3 Hz  
FT size 65536  
Total time 31 min, 50 sec

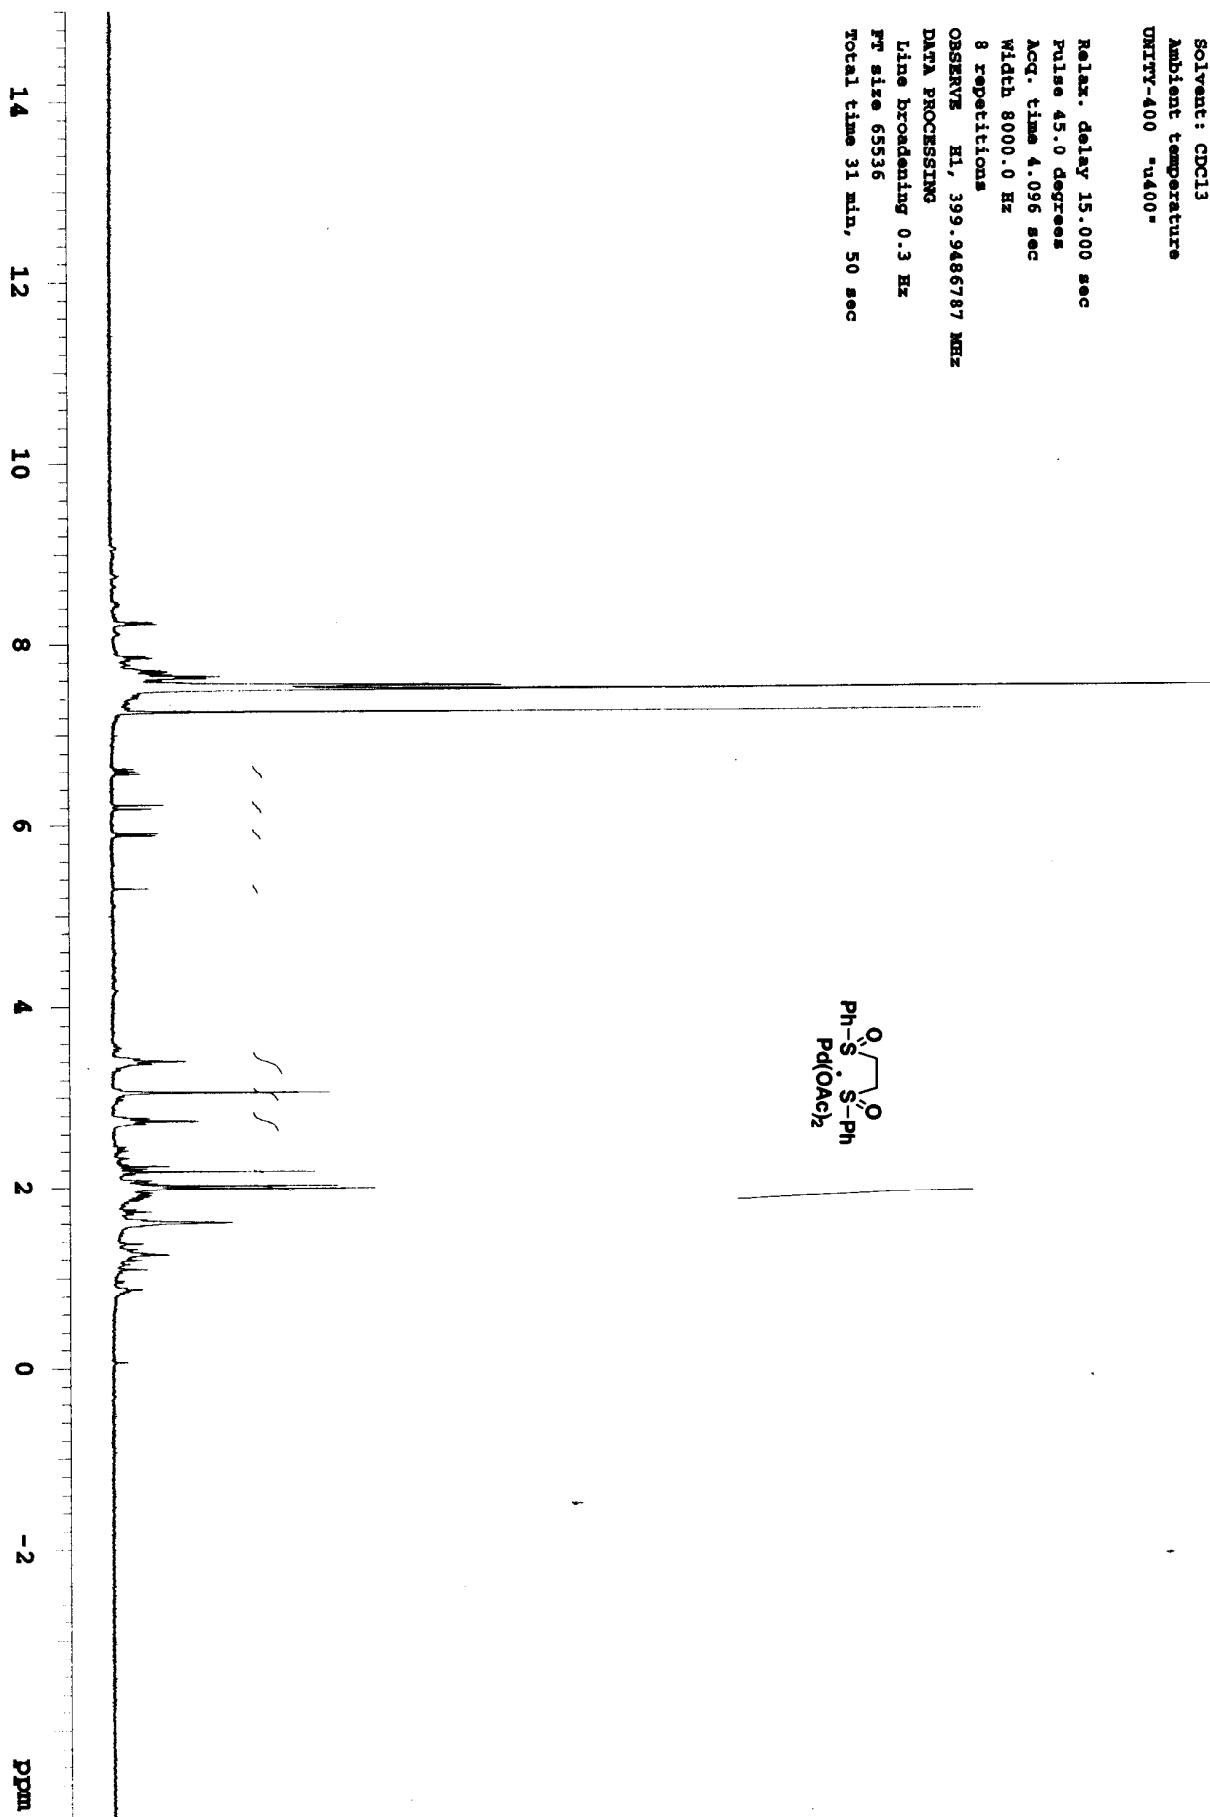

Pulse Sequence: s2pul  
Solvent: CDCl<sub>3</sub>  
Ambient temperature  
UNIT-400 "u400"

Relax. delay 15.000 sec  
Pulse 45.0 degrees  
Acq. time 4.096 sec  
Width 8000.0 Hz  
4 repetitions  
OBSERVE H1, 399.9486787 MHz  
DATA PROCESSING  
Line broadening 0.3 Hz  
FT size 65536  
Total time 31 min, 50 sec

Pd(OAc)<sub>2</sub> Before Recrystallization

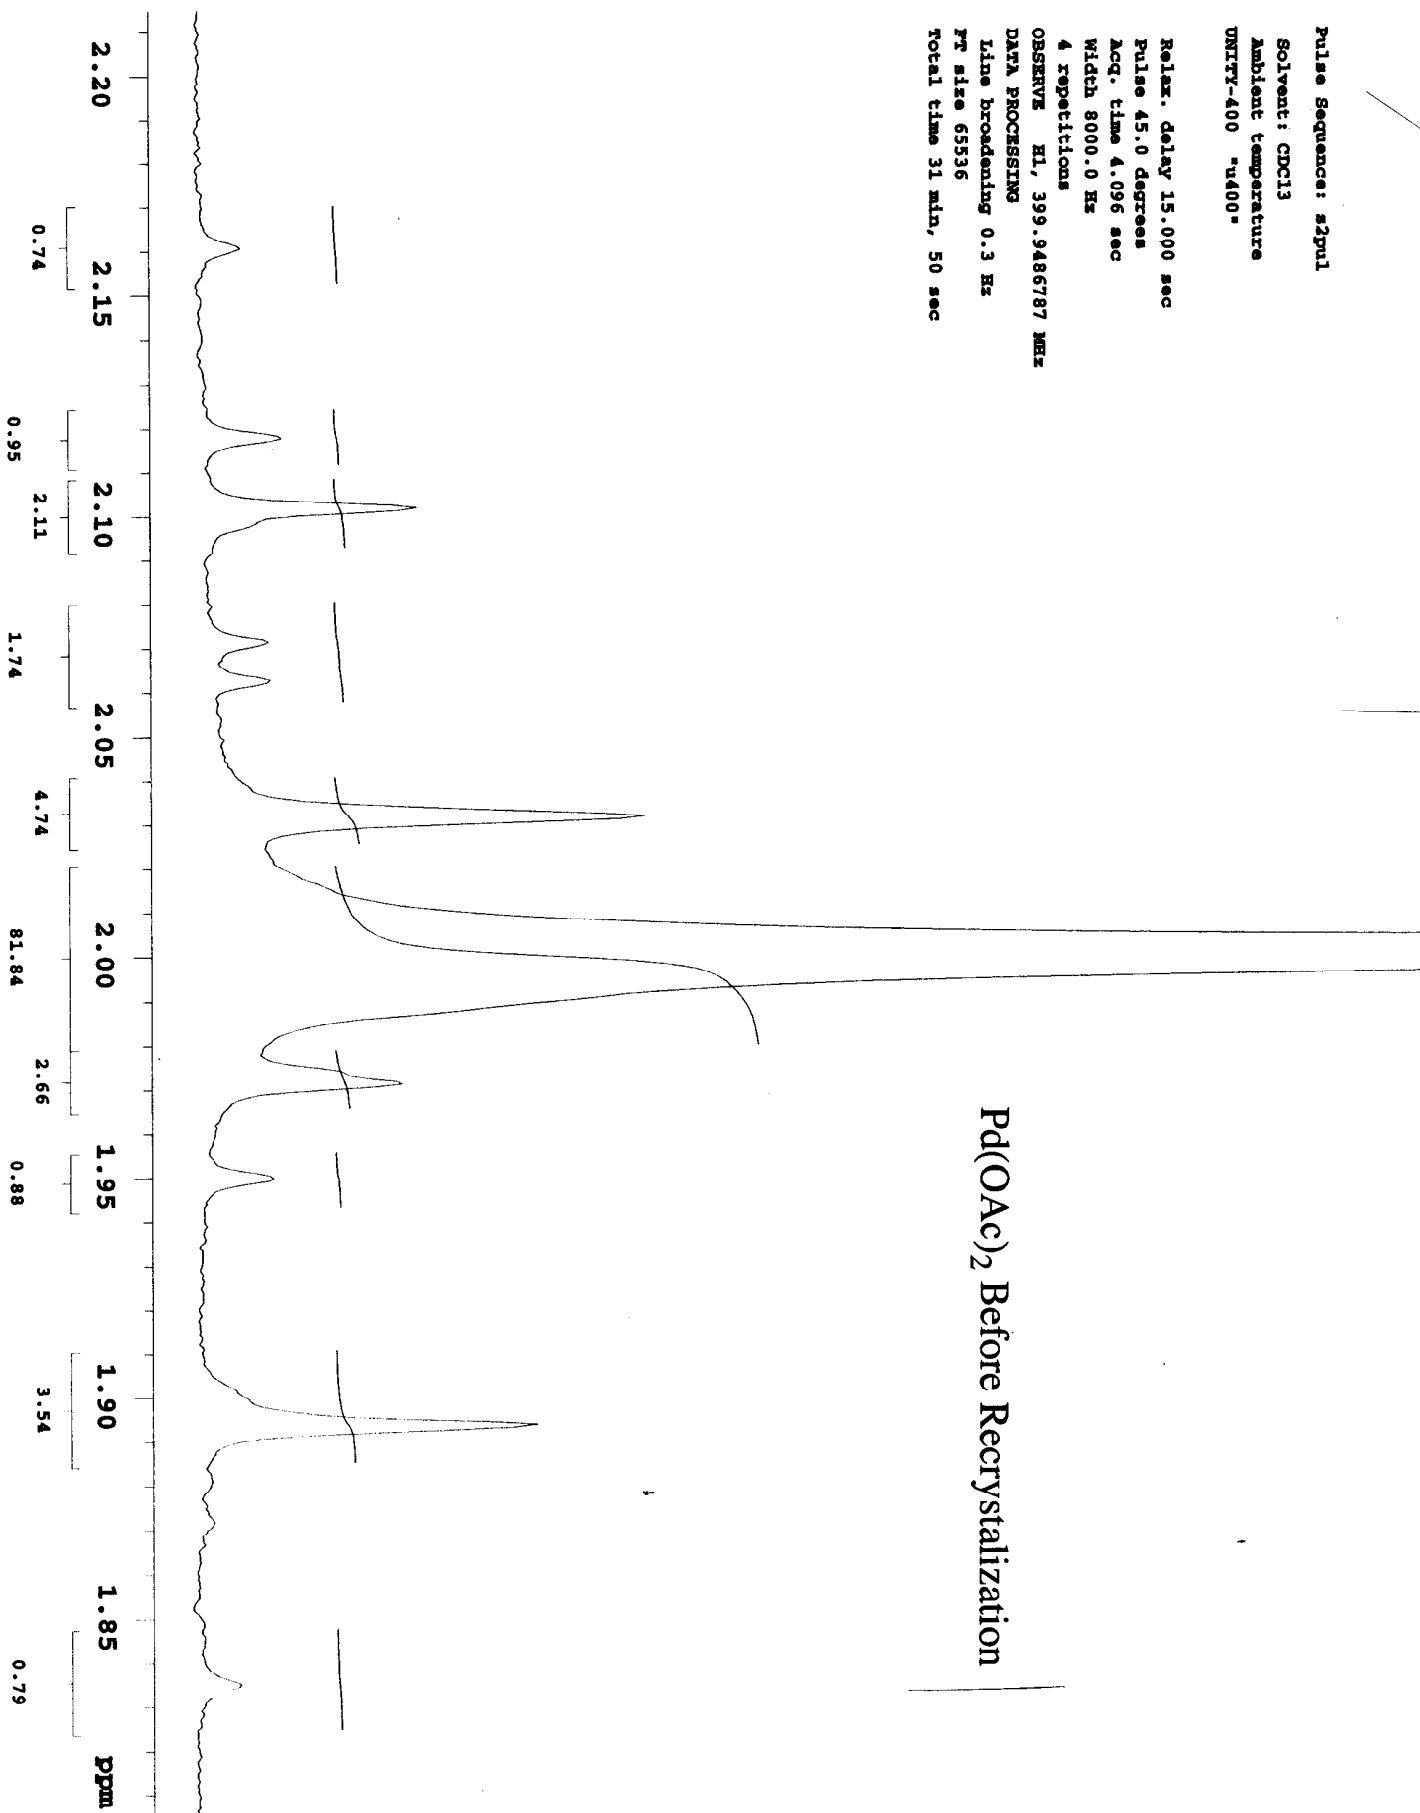

Pulse sequence: zgpg1  
Solvent: CDCl<sub>3</sub>  
Ambient temperature  
UNIT-500 "u500"

Relax. delay 15.000 sec  
Pulse 45.0 degrees  
Acq. time 4.665 sec  
Width 7024.9 Hz  
6 repetitions  
OBSERVE E1, 499.6964459 MHz  
DATA PROCESSING  
F1 size 65536  
Total time 32 min, 47 sec

Pd(OAc)<sub>2</sub> After Recrystallization

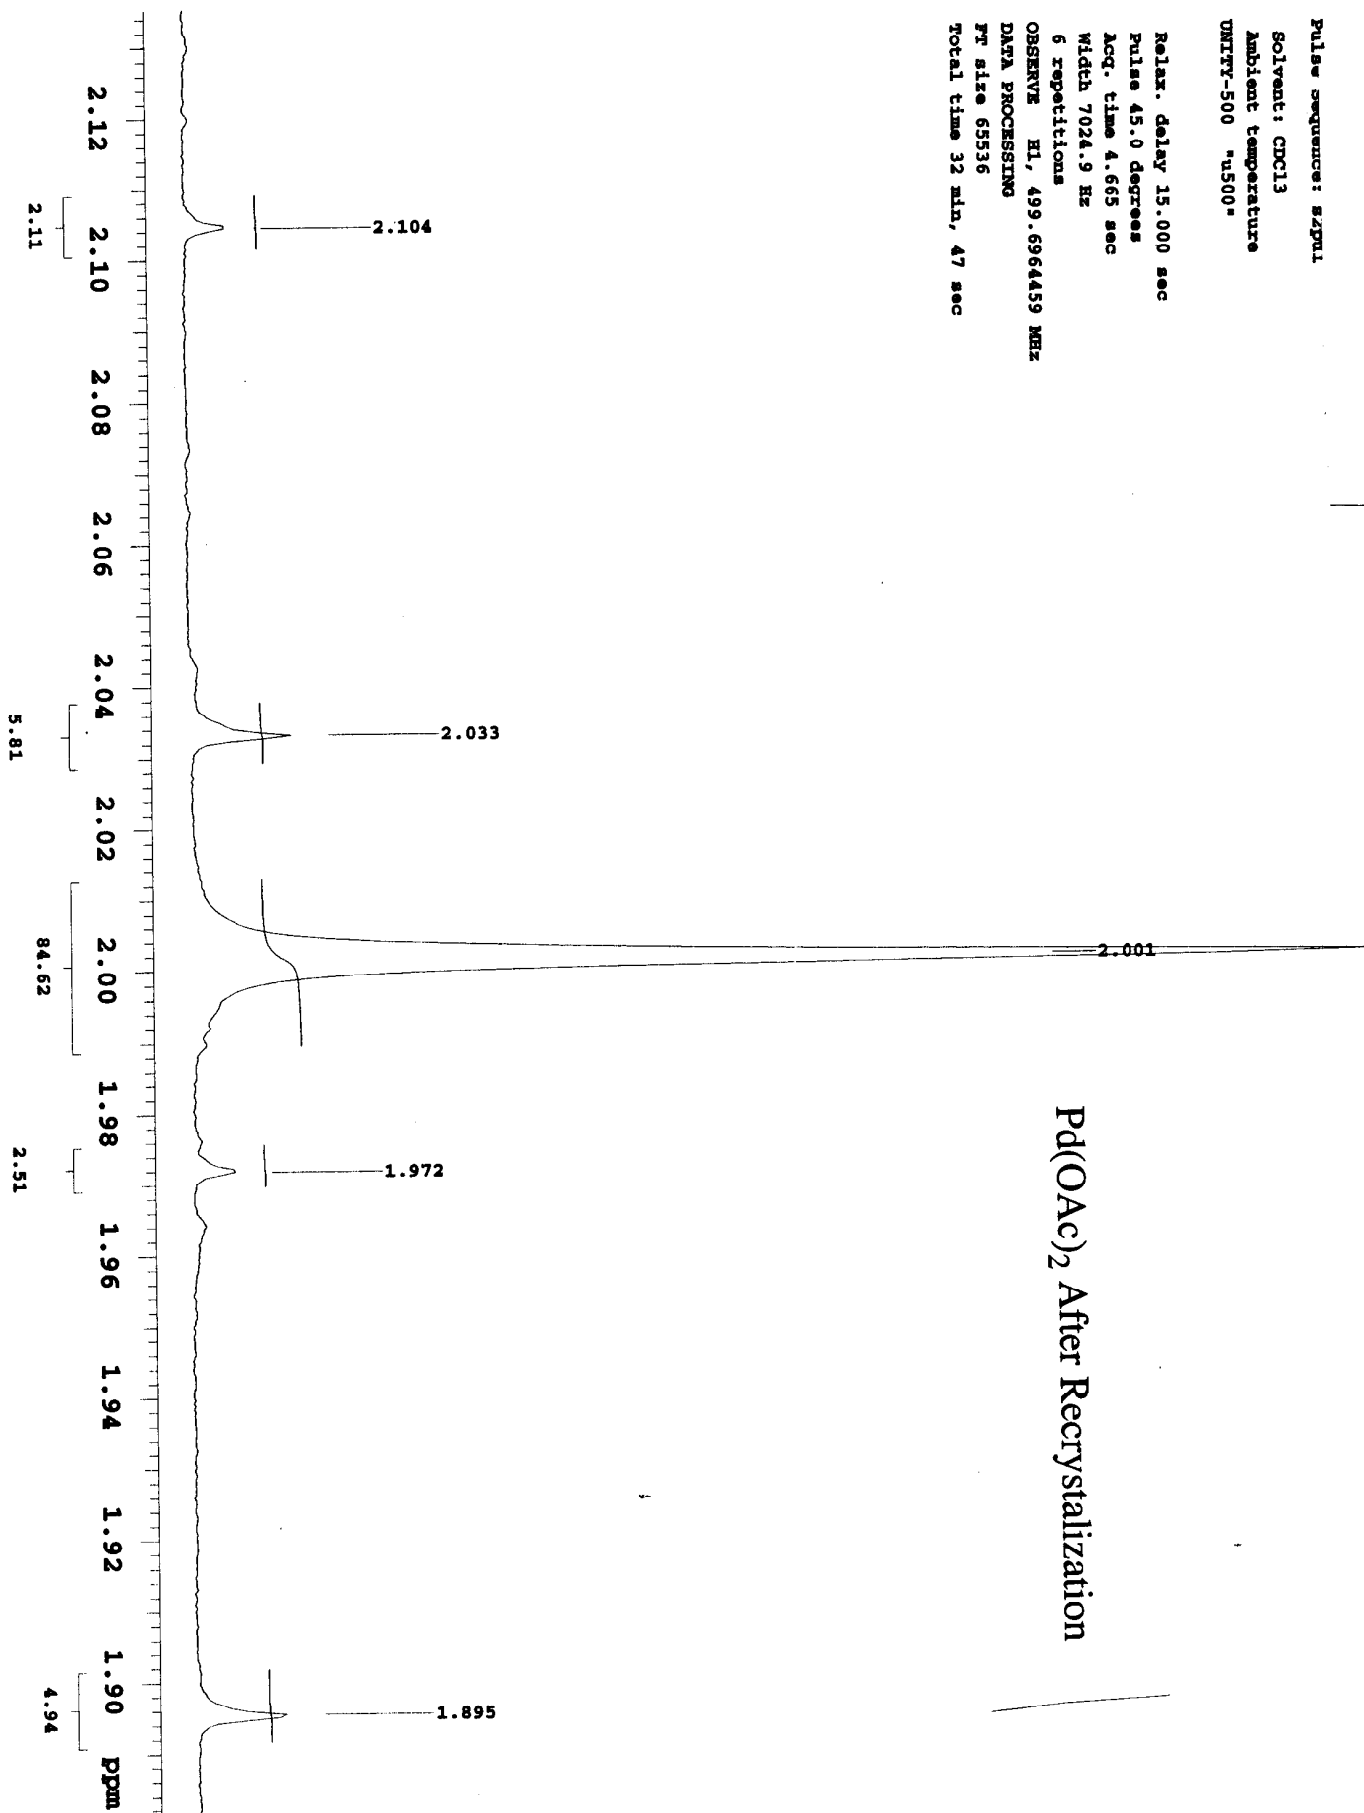

**INNOVA-500 "u1.500ab"**

**Total time 31 min, 50 sec**

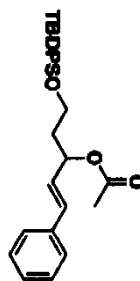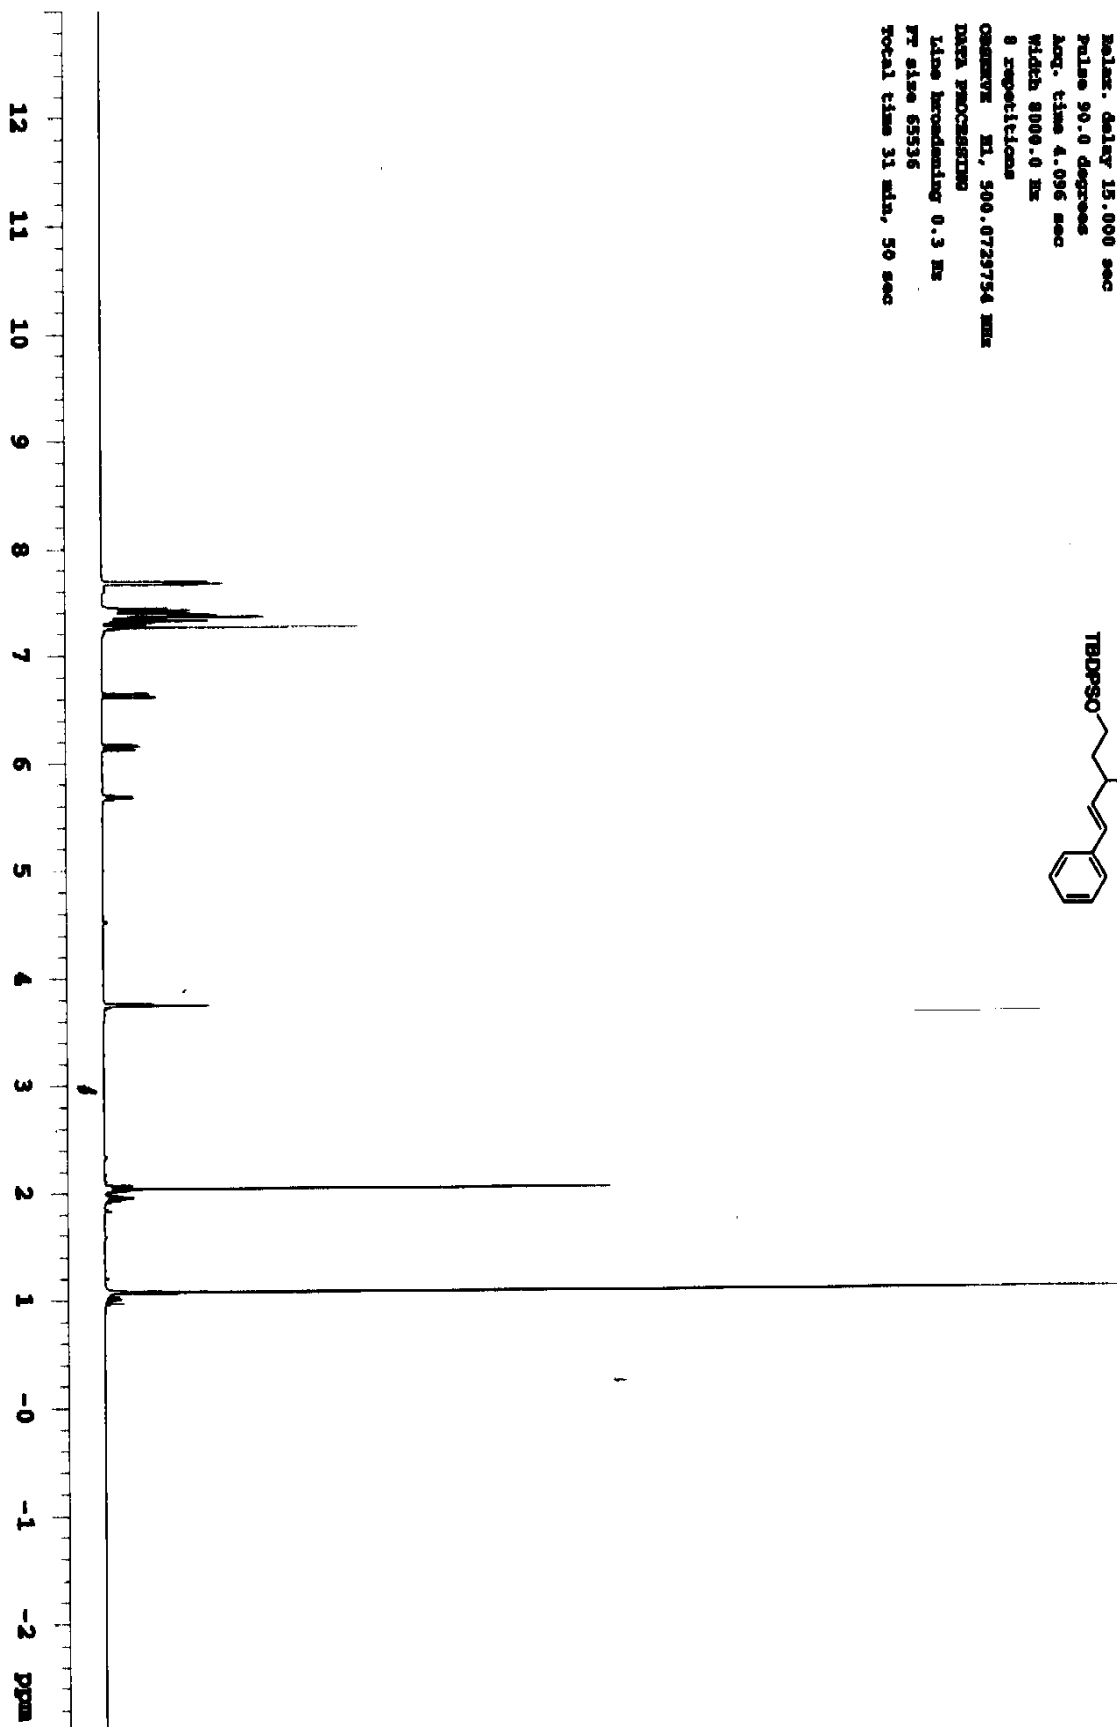

**UNIT-400 -u400-**

**Total time 55 min, 21 sec**

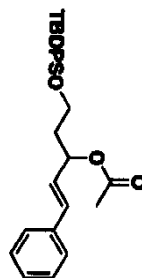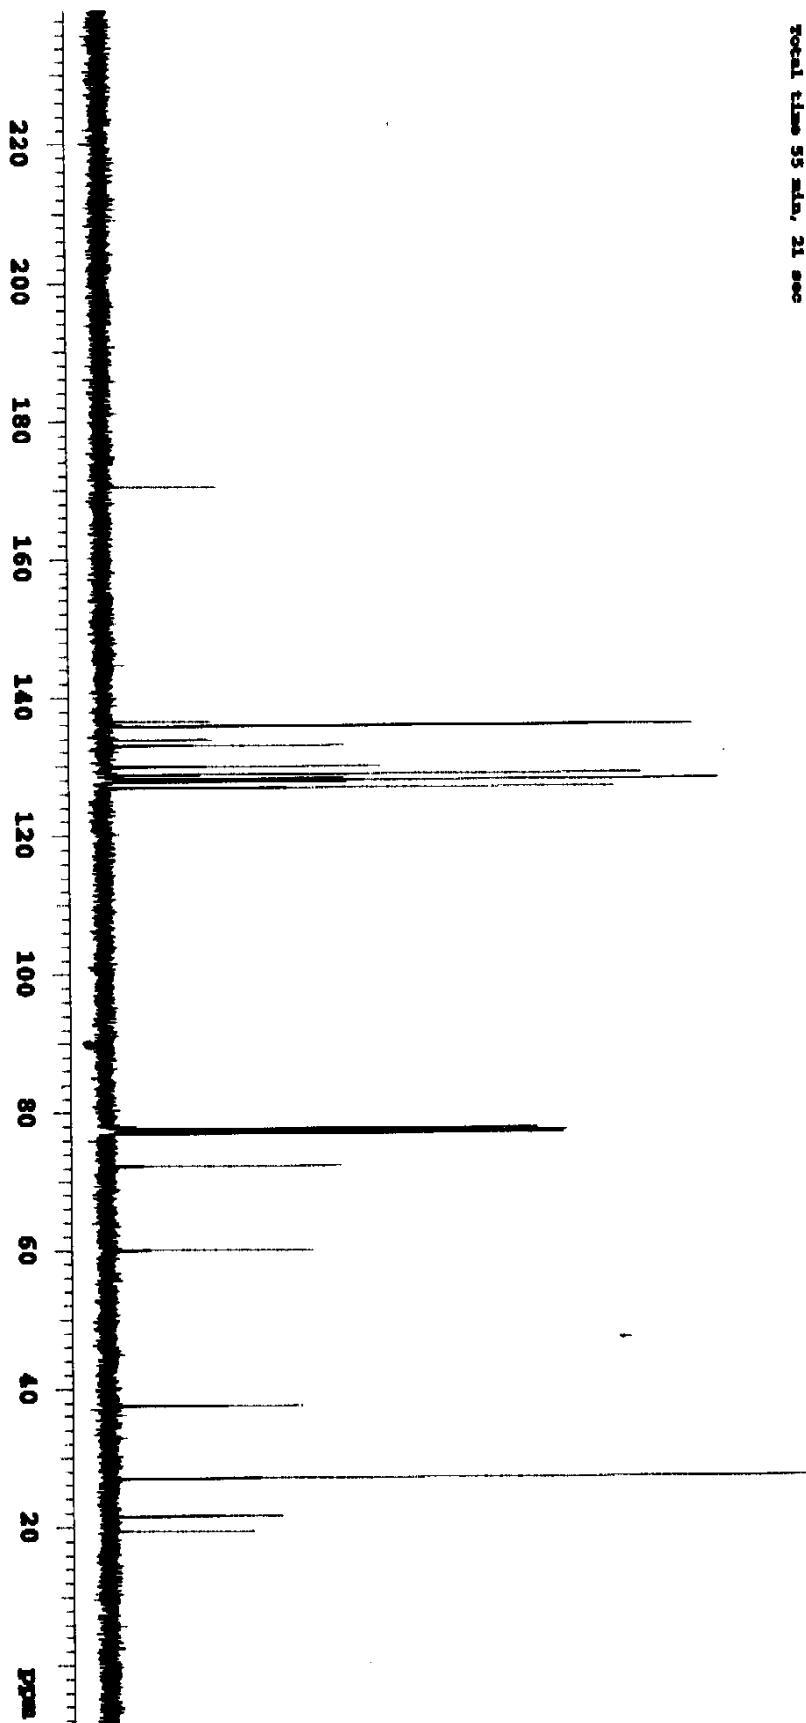

Pulse sequence: zgpg30

Solvent: CDCl<sub>3</sub>

Ambient temperature

UNIT-500 "vax500"

Relax. delay 15.000 sec

Pulse 50.0 degrees

Acq. time 4.095 sec

Width 8000.0 Hz

4 repetitions

OBSERVE F1, 499.4356718 MHz

DATA PROCESSING

Line broadening 0.3 Hz

F2 also 65336

Total time 31 min, 50 sec

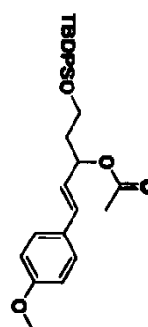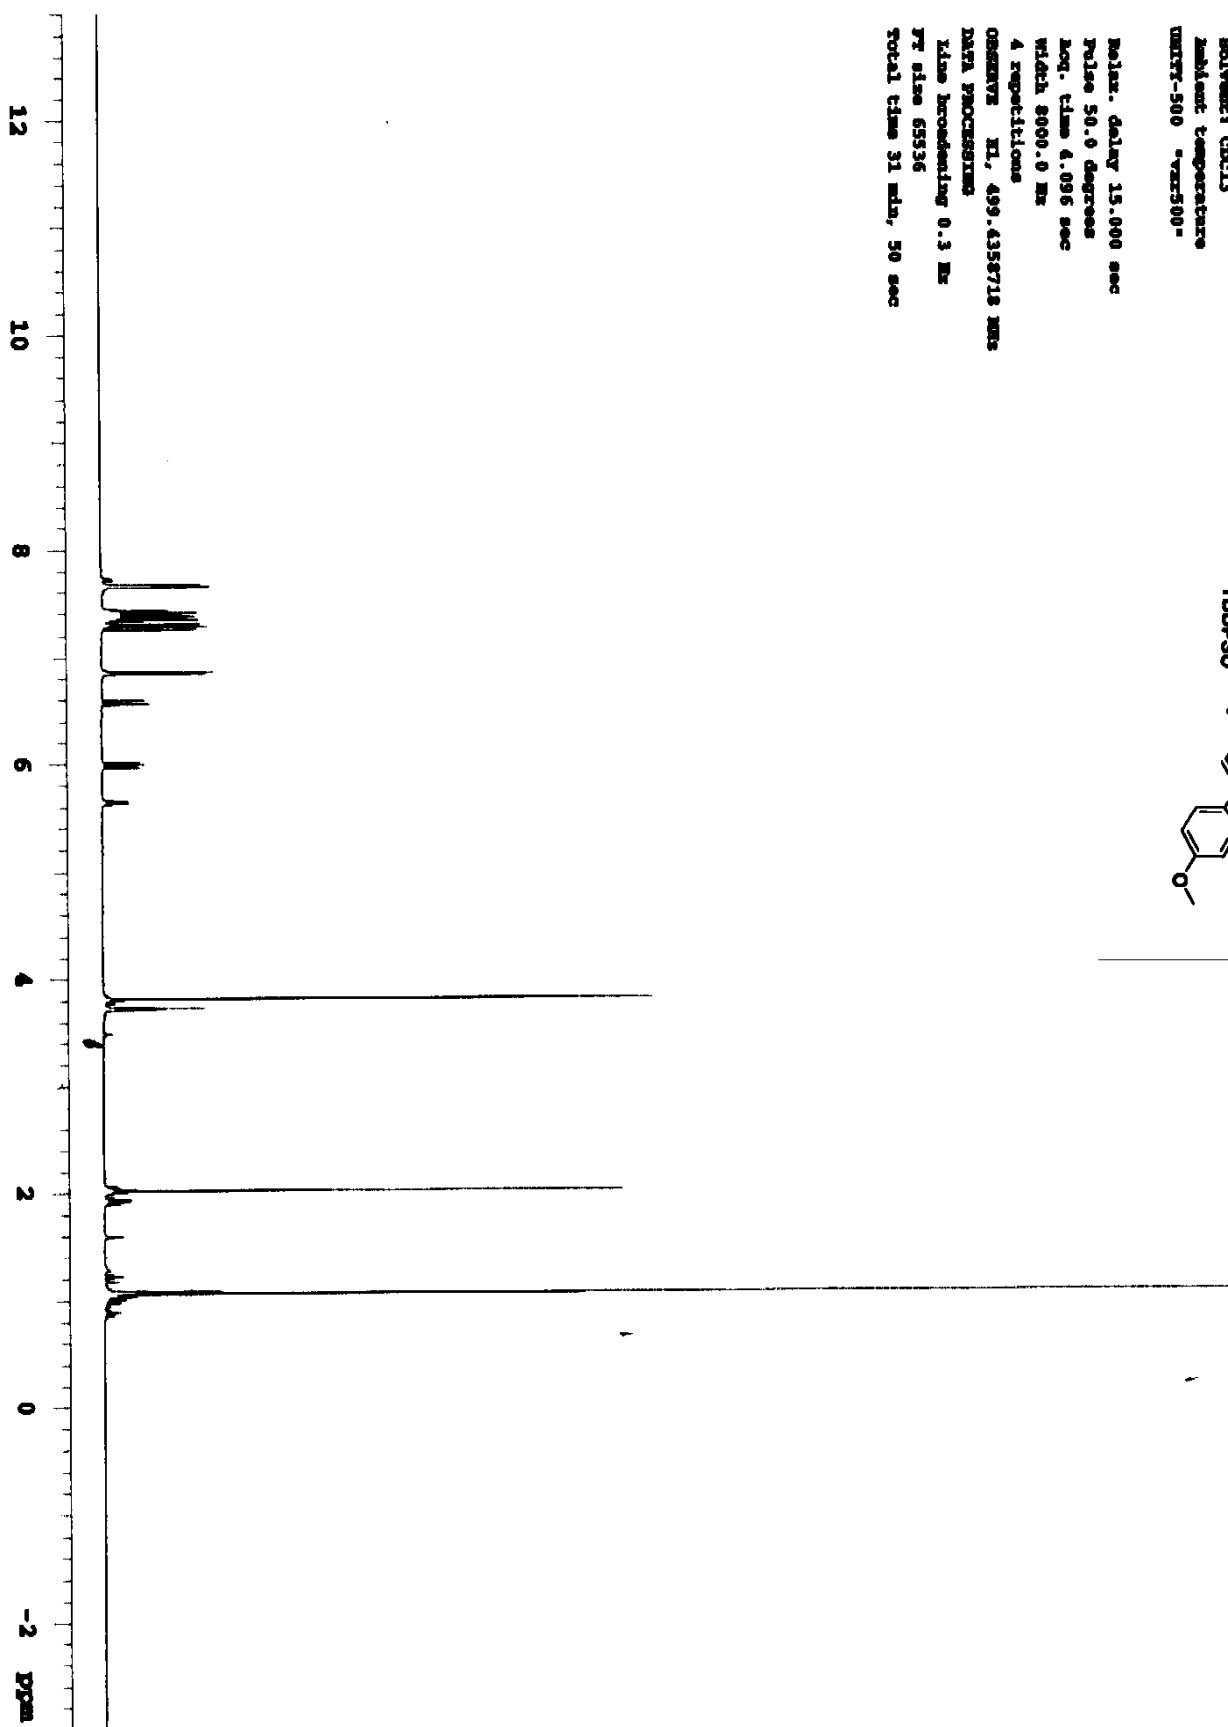



Pulse Sequence: zgpg1

Solvent: CDCl<sub>3</sub>

Ambient temperature

User: 1-14-87

UNITS-500 "vzf500"

Dolax. delay 5.000 sec

Pulse 42.4 degrees

Acq. time 1.024 sec

Width 32000.0 Hz

126 repetitions

OBSERVE C13, 125.583247 MHz

INOCORPUL EL, 499.437375 MHz

Power 44 dB

continuously on

WALTZ-16 modulated

DATA PROCESSING

Line broadening 1.0 Hz

FT size 65536

Total time 1 hr, 57 min, 14 sec

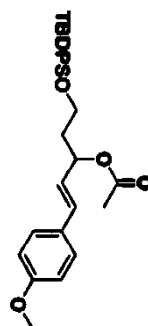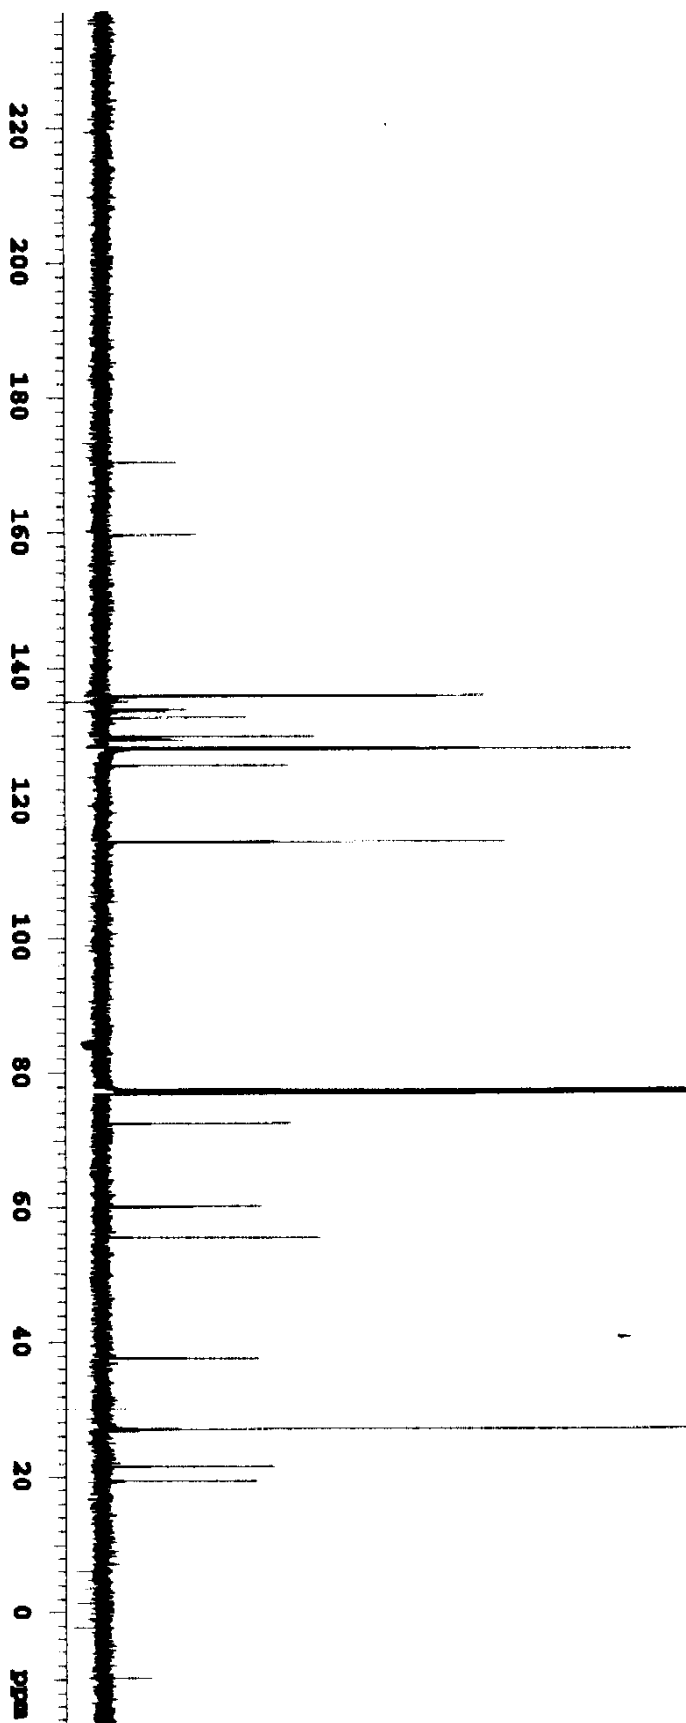

Pulse Sequence: zgpg30

Solvent: CDCl<sub>3</sub>

Ambient temperature

UNITY-500 "vxt500"

Relax. delay 15.000 sec

Pulse 45.0 degrees

Acq. time 4.096 sec

Width 8000.0 Hz

8 repetitions

OBSERVE F1, 499.4358718 MHz

DATA PROCESSING

Line broadening 0.3 Hz

FT size 65536

Total time 31 min, 50 sec

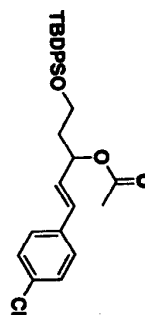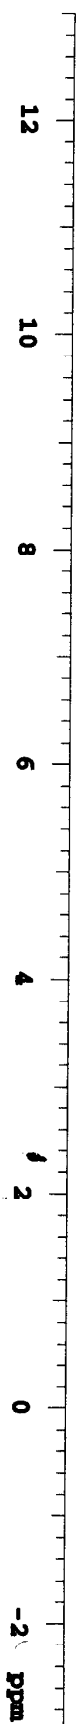

Pulse sequence: zgpg1

Solvent: CDCl<sub>3</sub>

Acidic temperature

DEPT-400 "400"

Relax. delay 1.000 sec

Pulse 45.0 degrees

Acq. time 1.311 sec

Width 25000.0 Hz

64 repetitions

Observed C13, 100.5671568 MHz

INSTRUM: IN, 399.9500118 MHz

Power 48 dB

continuously on

WATER-16 modulated

DATA PROCESSING

Time broadening 1.0 Hz

FT size 65536

Total time 38 min, 41 sec

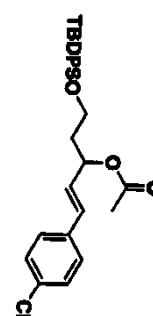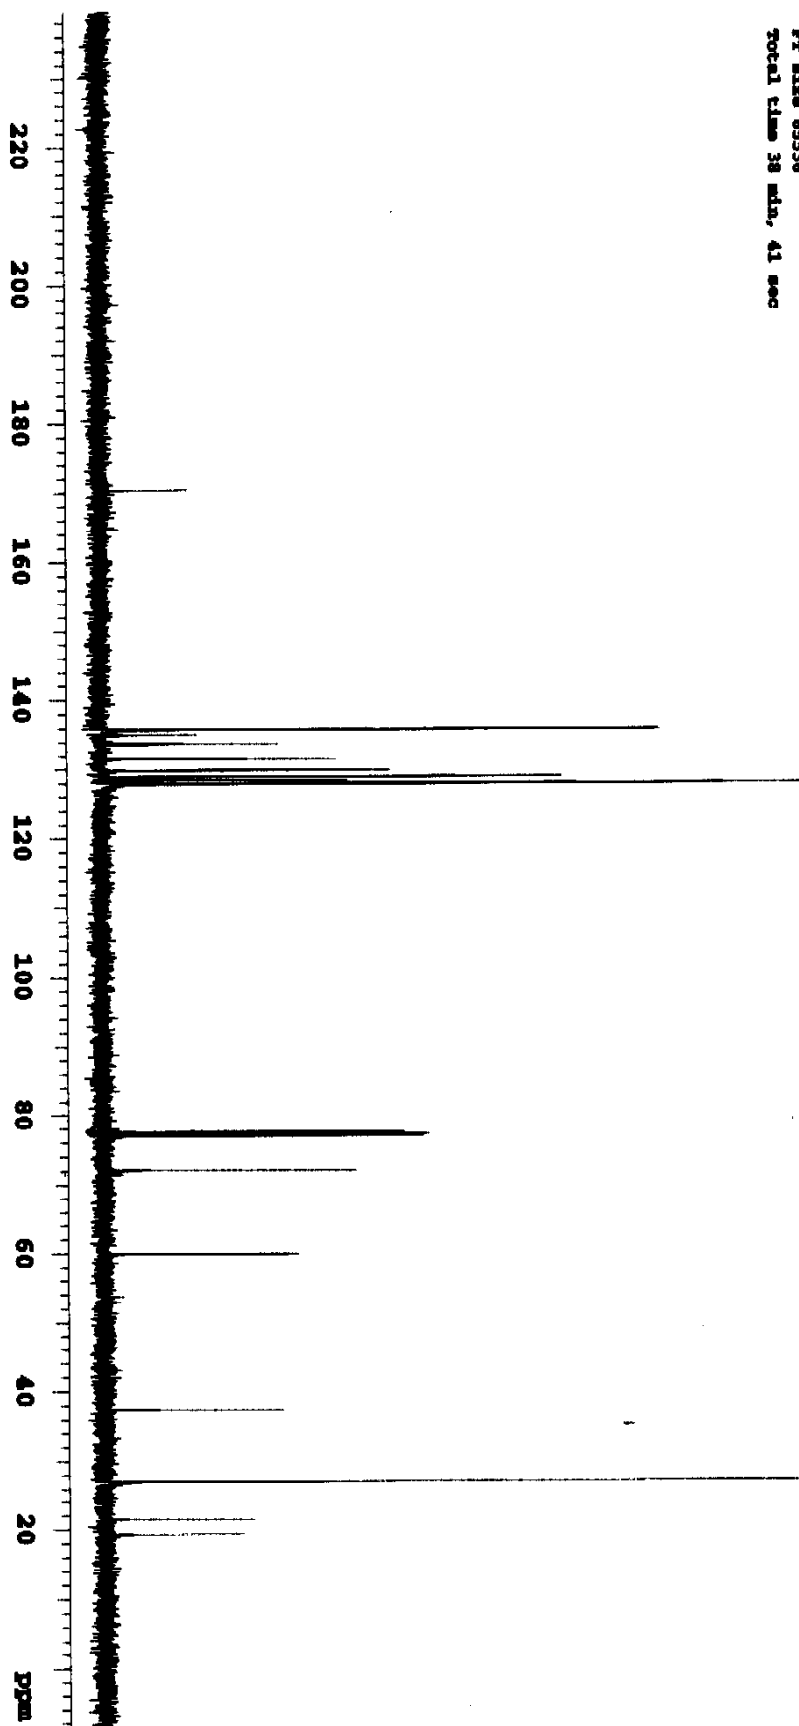

Pulse Sequence: zgpg30  
Solvent: CDCl<sub>3</sub>  
Ambient temperature  
UNIT-500 "vax500"

Relax. delay 15.000 sec  
Pulse 45.0 degrees  
Acq. time 4.096 sec  
Width 8000.0 Hz  
6 repetitions  
OBSERVE H1, 499.4358718 MHz  
DATA PROCESSING  
Line broadening 0.3 Hz  
F2 size 65536  
Total time 31 min, 50 sec

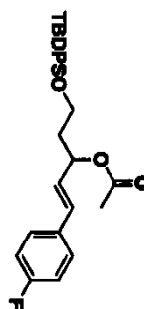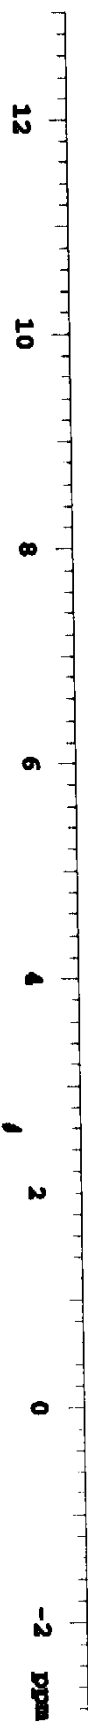

Pulse sequence: zgpg1

Solvent: CDCl<sub>3</sub>

ambient temperature

Use: 1-14-87

UNIT-300 "VARIAN"

Relax. delay 4.000 sec

Pulse 35.4 degrees

Acq. time 1.024 sec

Width 32000.0 Hz

32 repetitions

Observed CL3, 125.5831554 MHz

Decoupled H1, 499.4375375 MHz

Power 44 dB

continuously on

WALTZ-16 modulated

DATA PROCESSING

Time broadening 1.0 Hz

FT size 65536

Total time 1 hr, 23 min, 54 sec

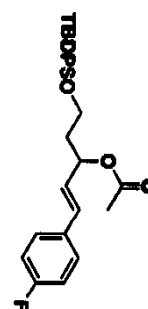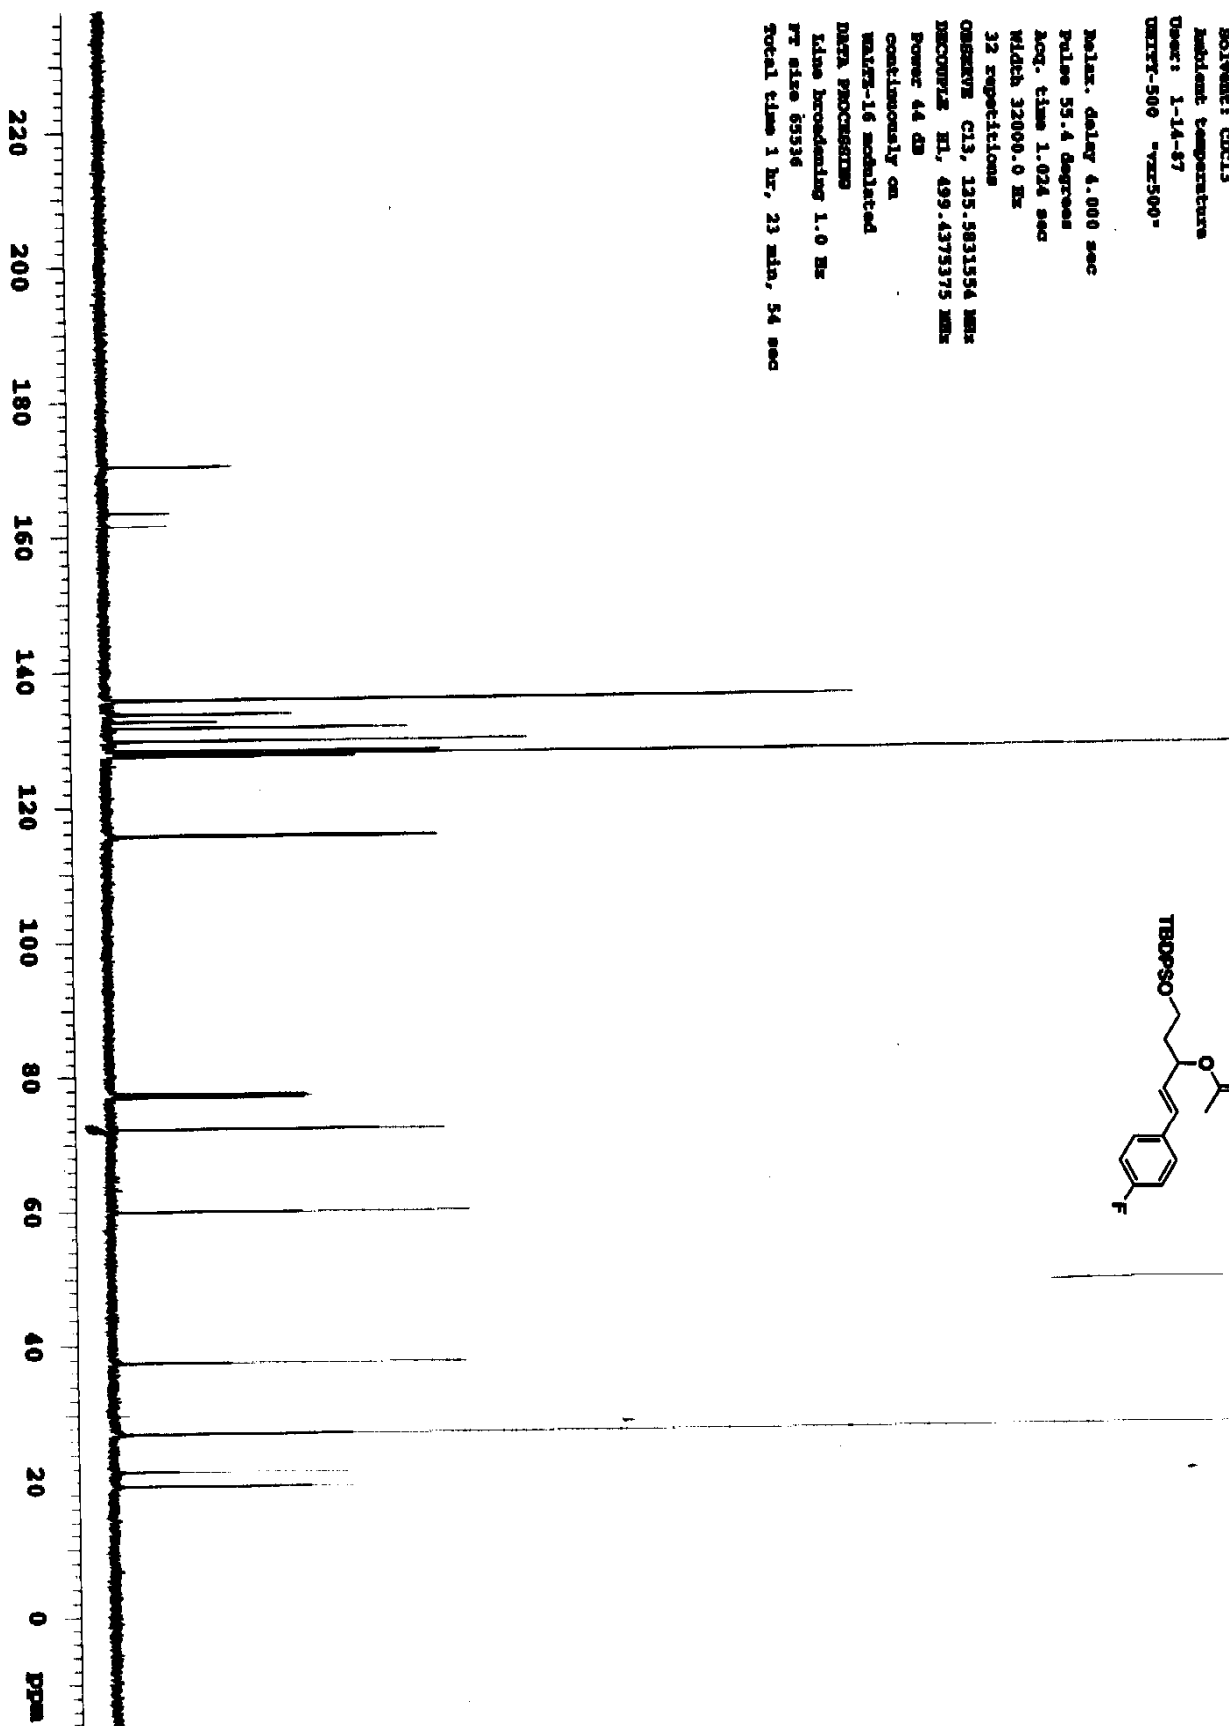

Pulse sequence: zgpg1  
Solvent: CDCl3  
Ambient temperature  
UNIT-500 "vnc500"

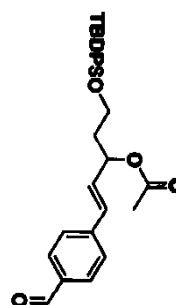

Relax. delay 15.000 sec  
Pulse 50.0 degrees  
Acq. time 4.096 sec  
Width 8000.0 Hz  
4 repetitions  
OBSERVE H1, 499.4358718 MHz  
DATA PROCESSING  
F2 also 65336  
F2 also 65336  
Total time 31 min, 50 sec

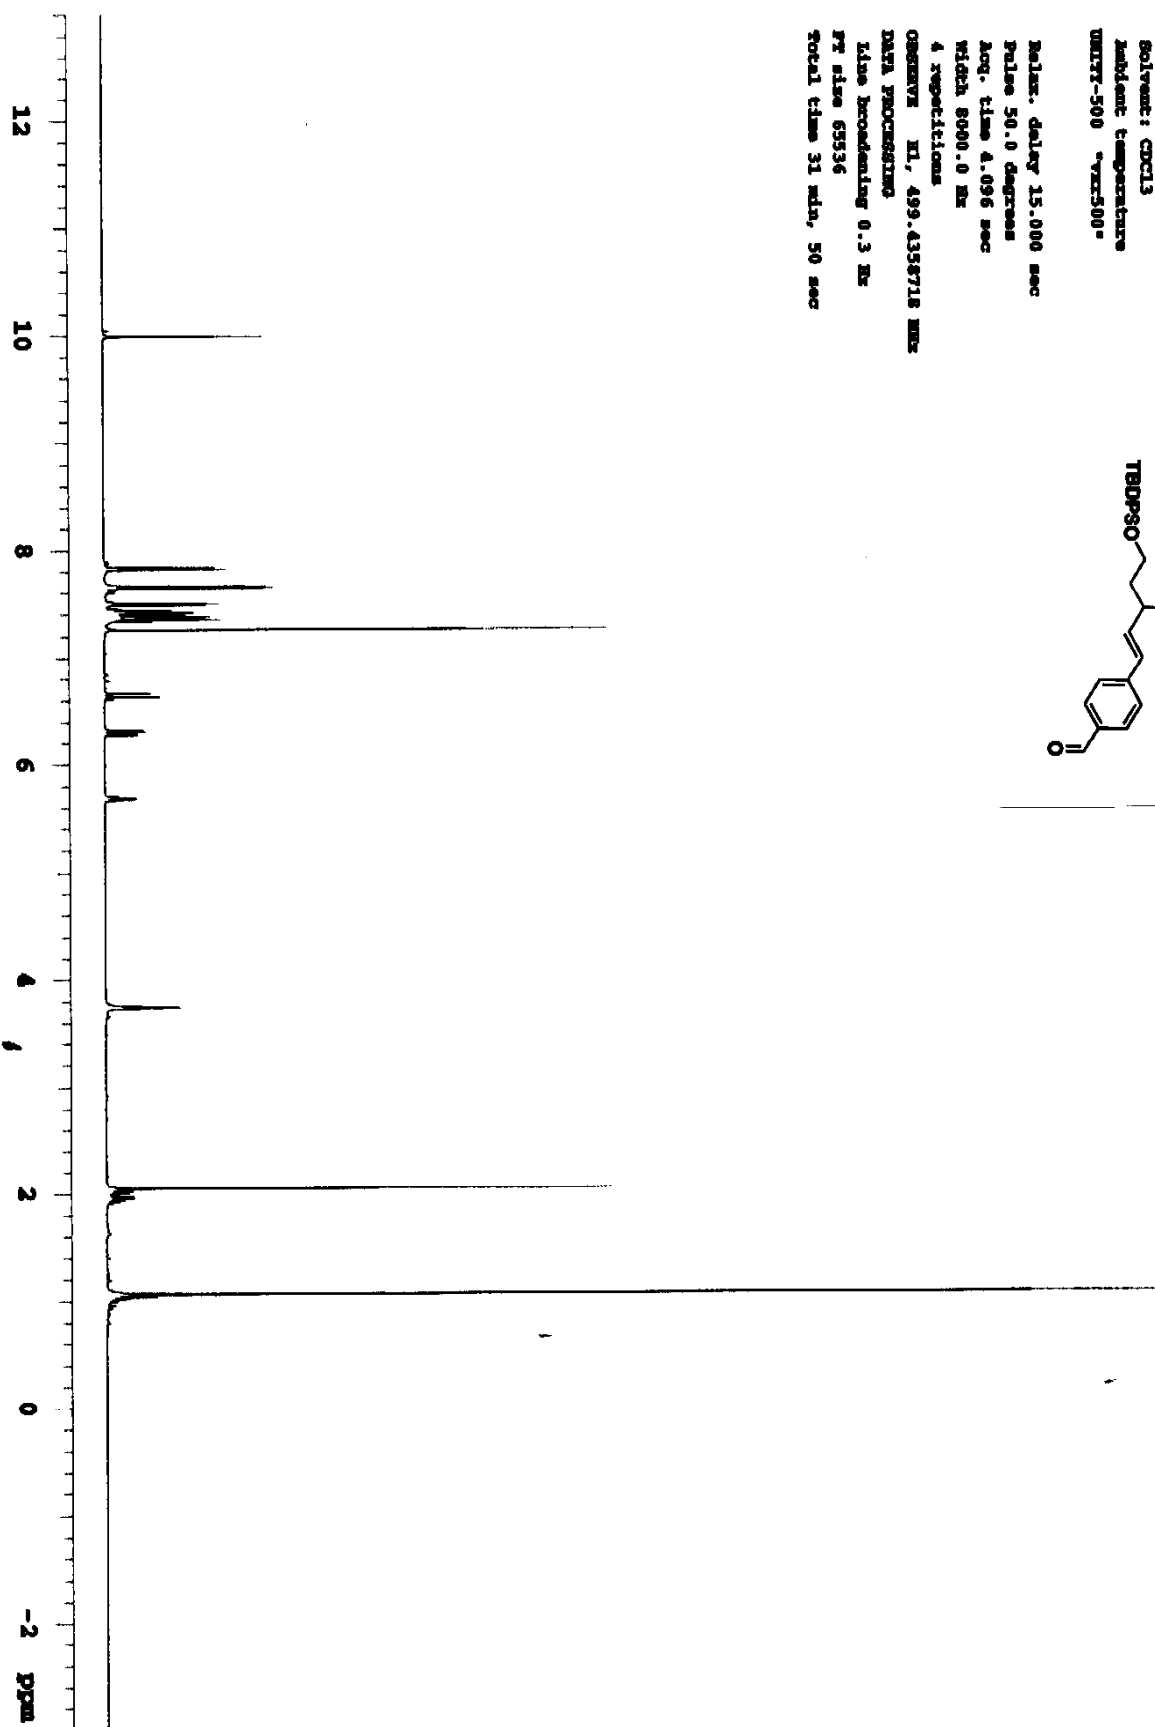

Pulse Sequence: zgpg30  
Solvent: CDCl3  
Acquisition temperature  
User: 1-14-87  
UNIT-500 "xyz500"

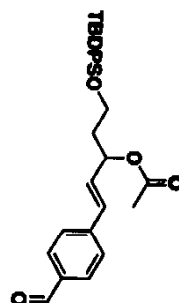

Relax. delay 2.000 sec  
Pulse 42.4 degrees  
Acq. time 1.024 sec  
Width 32000.0 Hz  
252 repetitions  
OBSERVED C13, 125.583247 MHz  
INCOMPLETE EL, 499.4375375 MHz  
Power 44 dB  
continuously on  
WALTZ-16 modulated  
DATA PROCESSING  
Line broadening 1.0 Hz  
PT also 65536  
Total time 50 min, 34 sec

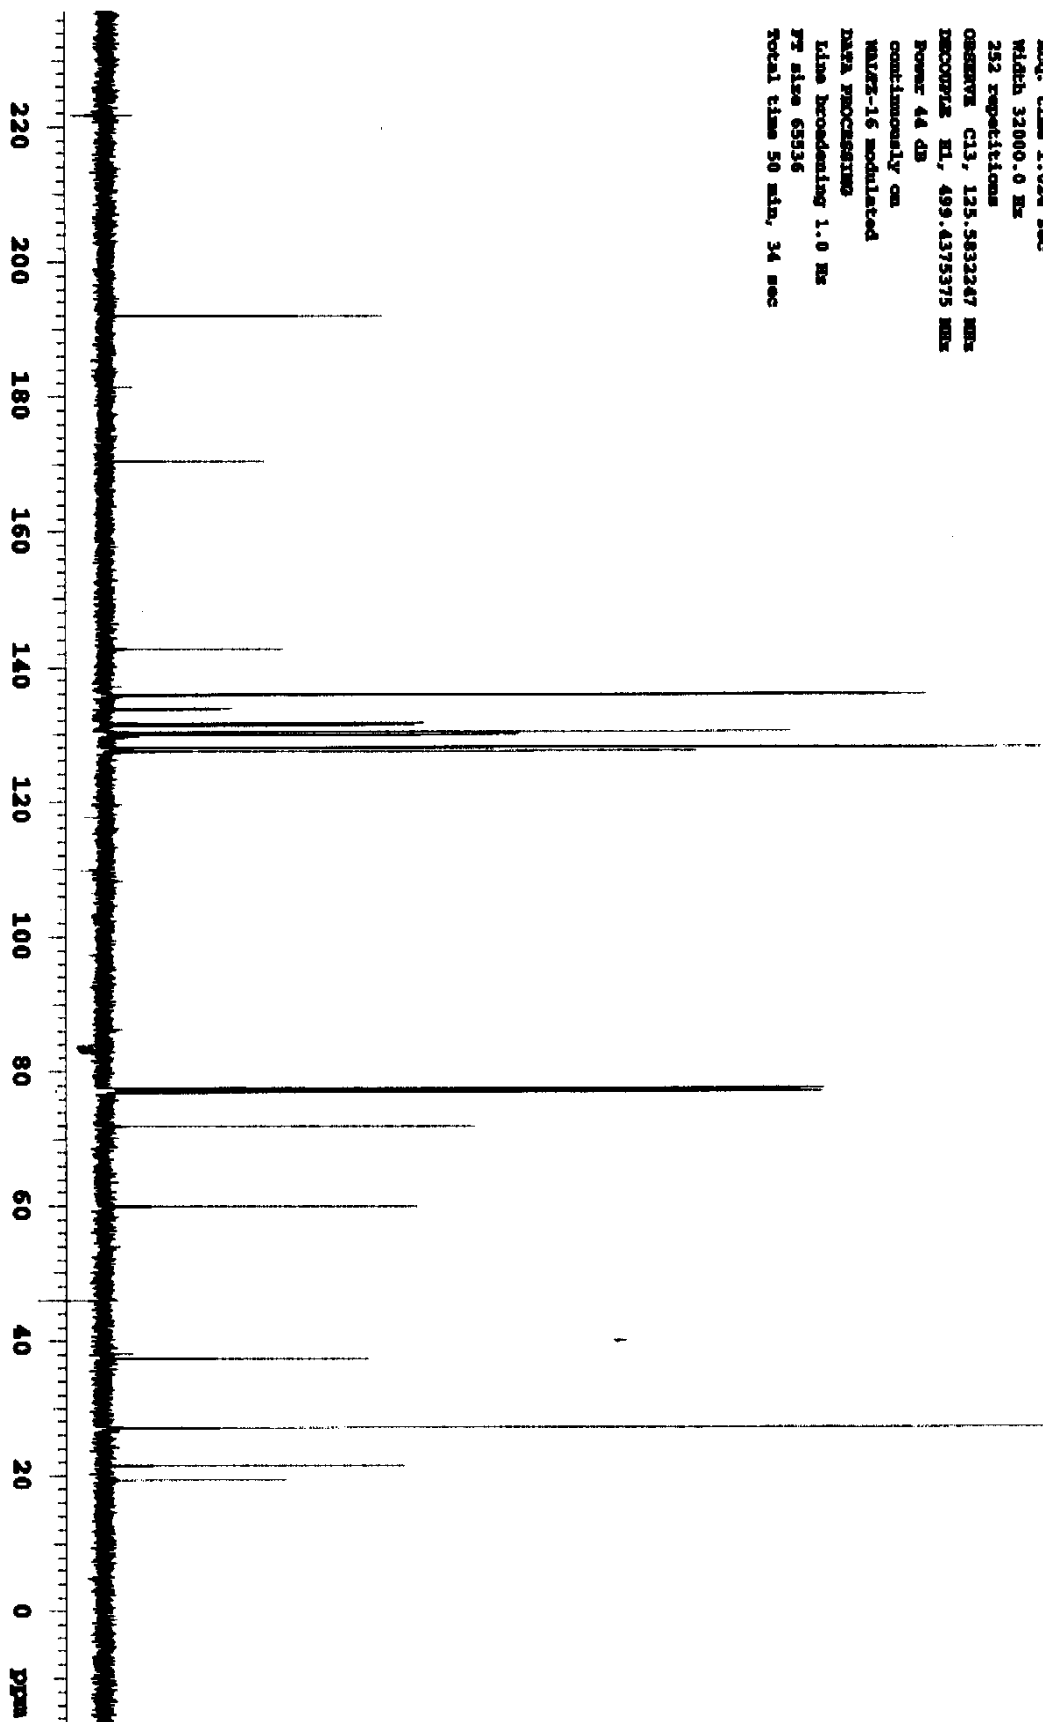

Pulse sequence: zgpg1

Solvent: CDCl<sub>3</sub>

Ambient temperature

UNITY-400 "400"

Pulse delay 15.000 sec

Pulse 45.0 degrees

Acq. time 4.096 sec

Width 8000.0 Hz

8 repetitions

OBSERVED HL, 399.948787 MHz

DATA PROCESSING

Line broadening 0.3 Hz

FT size 65536

Total time 31 min, 50 sec

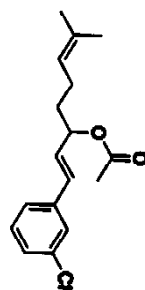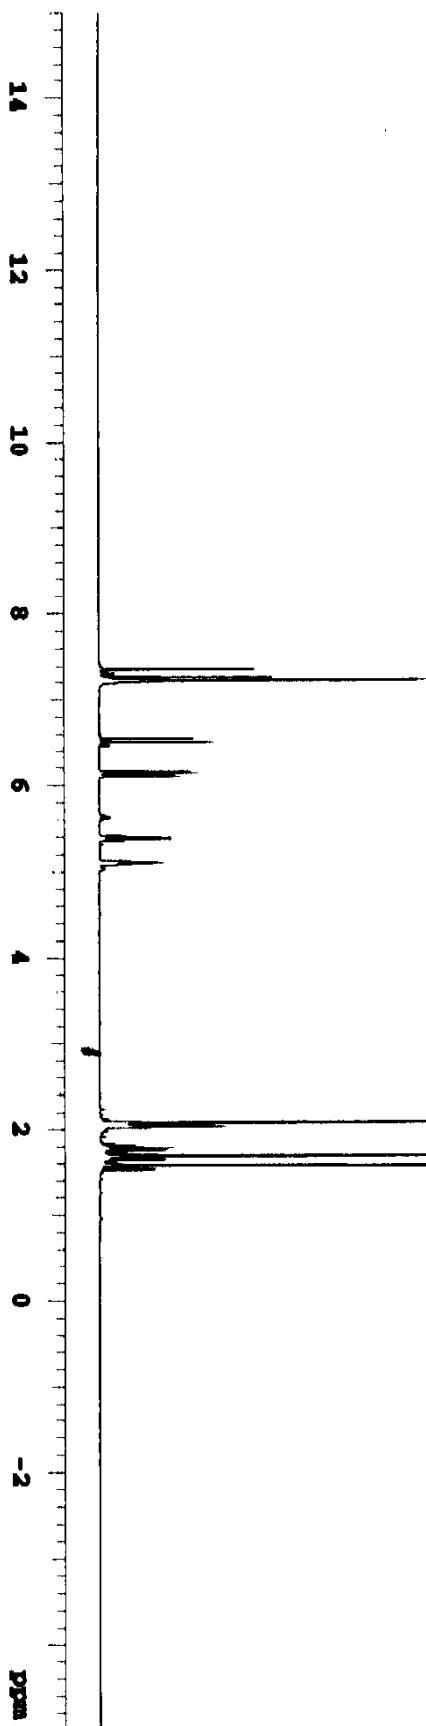



Pulse Sequence: zgpg30  
Solvent: CHCl<sub>3</sub>  
Ambient temperature  
DEPT-400 "a400"

Relax. delay 2.000 sec  
Pulse 45.0 degrees  
Acq. time 1.311 sec  
Width 25000.0 Hz  
30 repetitions  
OBSERVE CH1, 100.621561 MHz  
DECOUPLE XL, 399.9500118 MHz  
Power 48 dB  
continuously on  
WALTZ-16 modulated  
DATA PROCESSING  
F2 size 65536  
F2 time 55 min, 21 sec

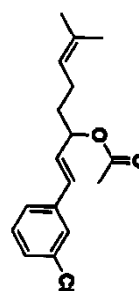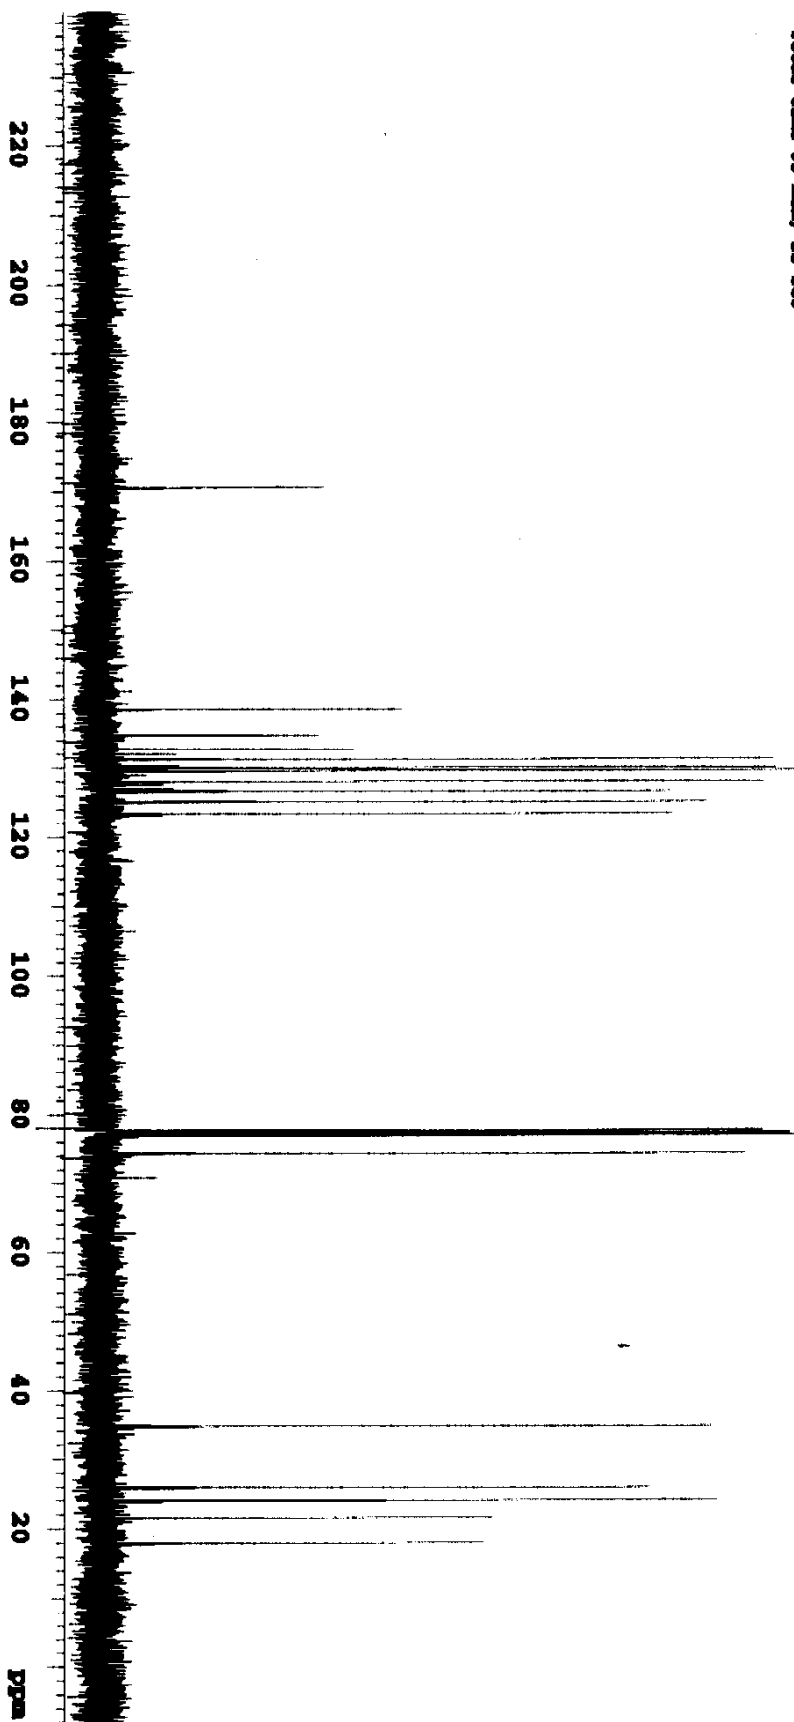

Pulse Sequence: zgpg30

Solvent: CDCl<sub>3</sub>

Ambient temperature

UNITY-400 "u400"

Relax. delay 15.000 sec

Pulse 45.0 degrees

Acq. time 4.096 sec

Width 8000.0 Hz

4 repetitions

OBSERVE H1, 399.9486787 MHz

DATA PROCESSING

Line broadening 0.3 Hz

FT size 65536

Total time 5 hr, 18 min, 26 sec

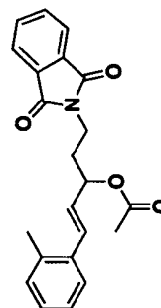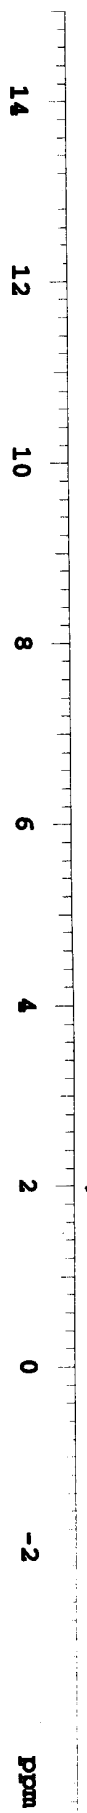

Pulse Sequence: s2pul  
Solvent: CDCl<sub>3</sub>  
Ambient temperature  
UNITY-400 "u400"

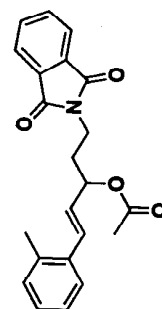

Relax. delay 2.000 sec  
Pulse 45.0 degrees  
Acq. time 1.311 sec  
Width 25000.0 Hz  
30 repetitions  
OBSERVE C13, 100.5671583 MHz  
DECOUPLE H1, 399.9500118 MHz  
Power 48 dB  
continuously on  
WALTZ-16 modulated  
DATA PROCESSING  
line broadening 1.0 Hz  
FT size 65536  
Total time 55 min, 21 sec

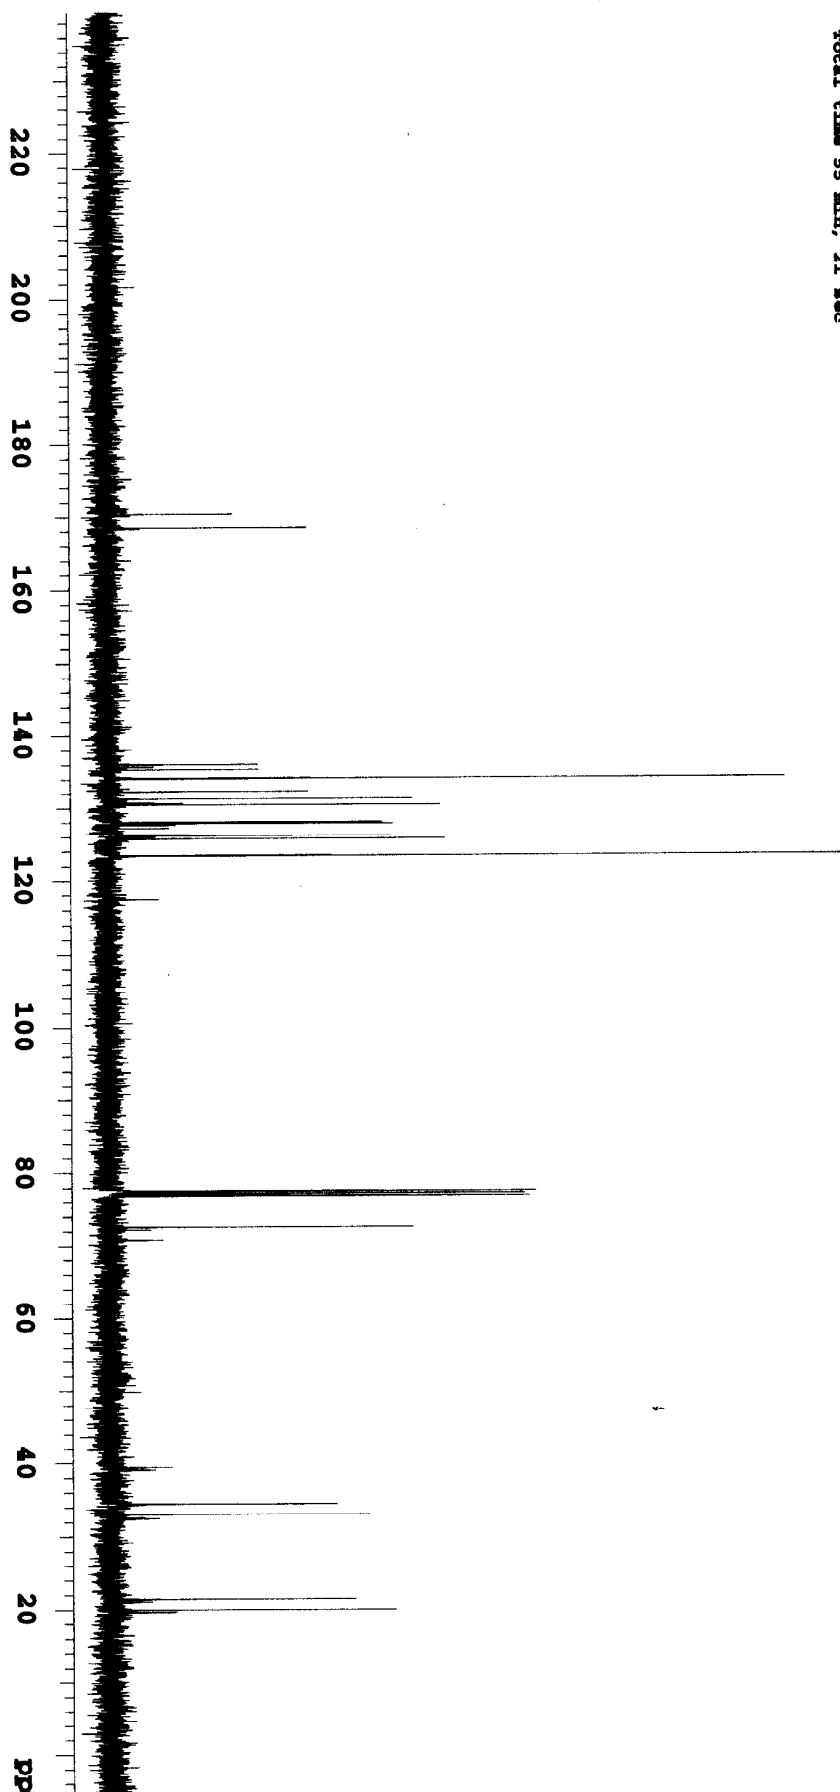

PT also 65536

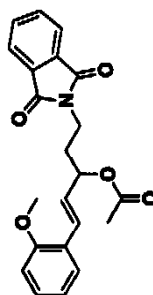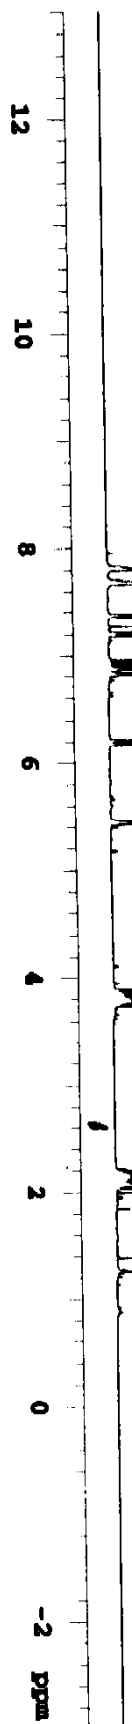

Pulse sequence: zgpg1

Solvent: CDCl<sub>3</sub>

Ambient temperature

Waltz: 1-14-87

UNIT-500 "vax500"

Relax. delay 4.000 sec

Pulse 55.4 degrees

Acq. time 1.024 sec

Width 3200.0 Hz

72 repetitions

CHARGE CL3, 125.5632316 MHz

INSTRUM HL, 499.437375 MHz

Power 44 dB

Continuously on

NAUTS-16 modulated

DATA PROCESSING

Line broadening 1.0 Hz

FT size 65536

Total time 1 hr, 23 min, 54 sec

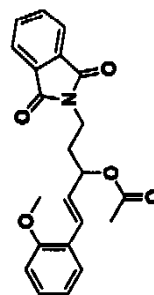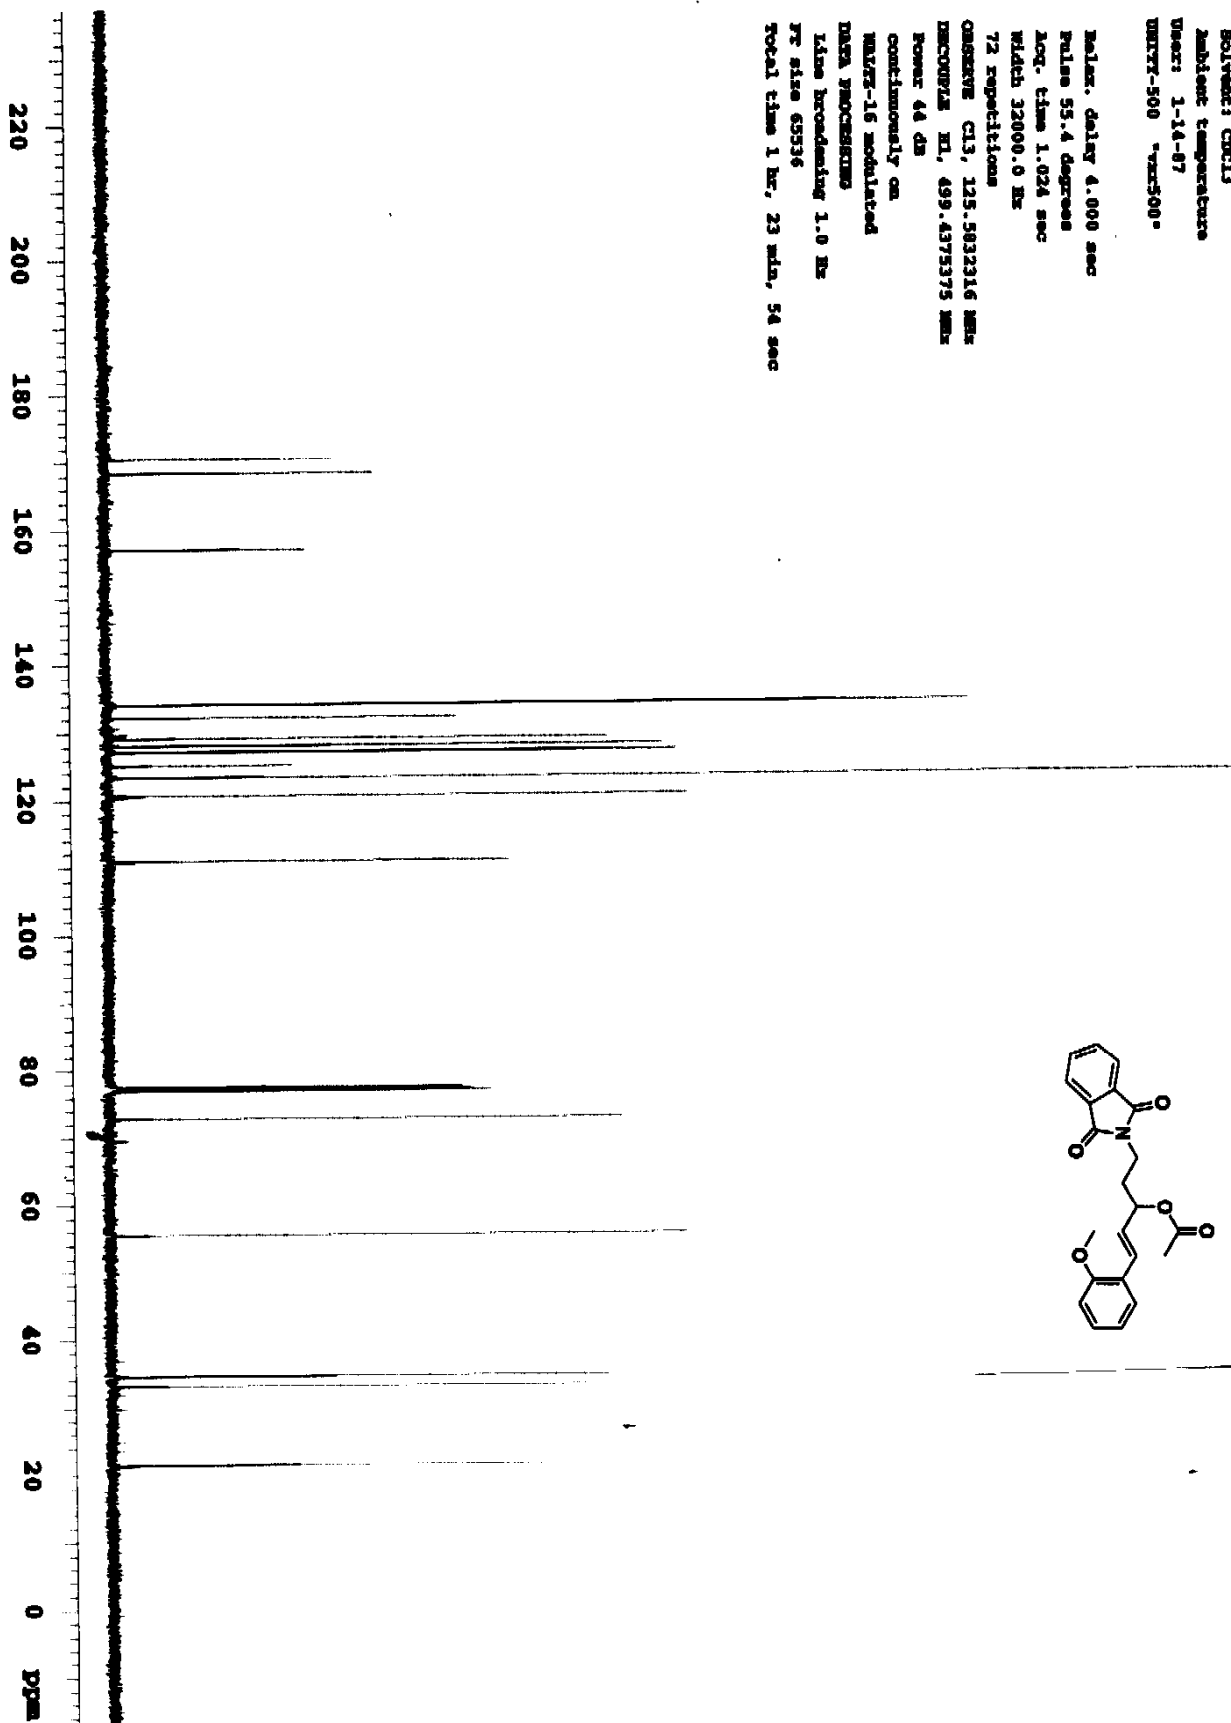

Pulse Sequence: zgpg1  
Solvent: CDCl3  
Ambient temperature  
UNITY-500 "var500"

Relax. delay 15.000 sec  
Pulse 45.0 degrees  
Acq. time 4.096 sec  
Width 8000.0 Hz  
8 repetitions

OBSERVE H1, 499.4358718 MHz  
DATA PROCESSING  
F2 size 65536  
F2 time 31 min, 50 sec  
Total time 31 min, 50 sec

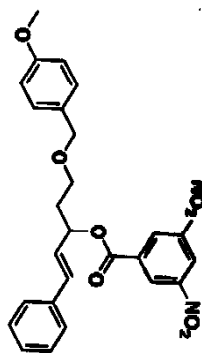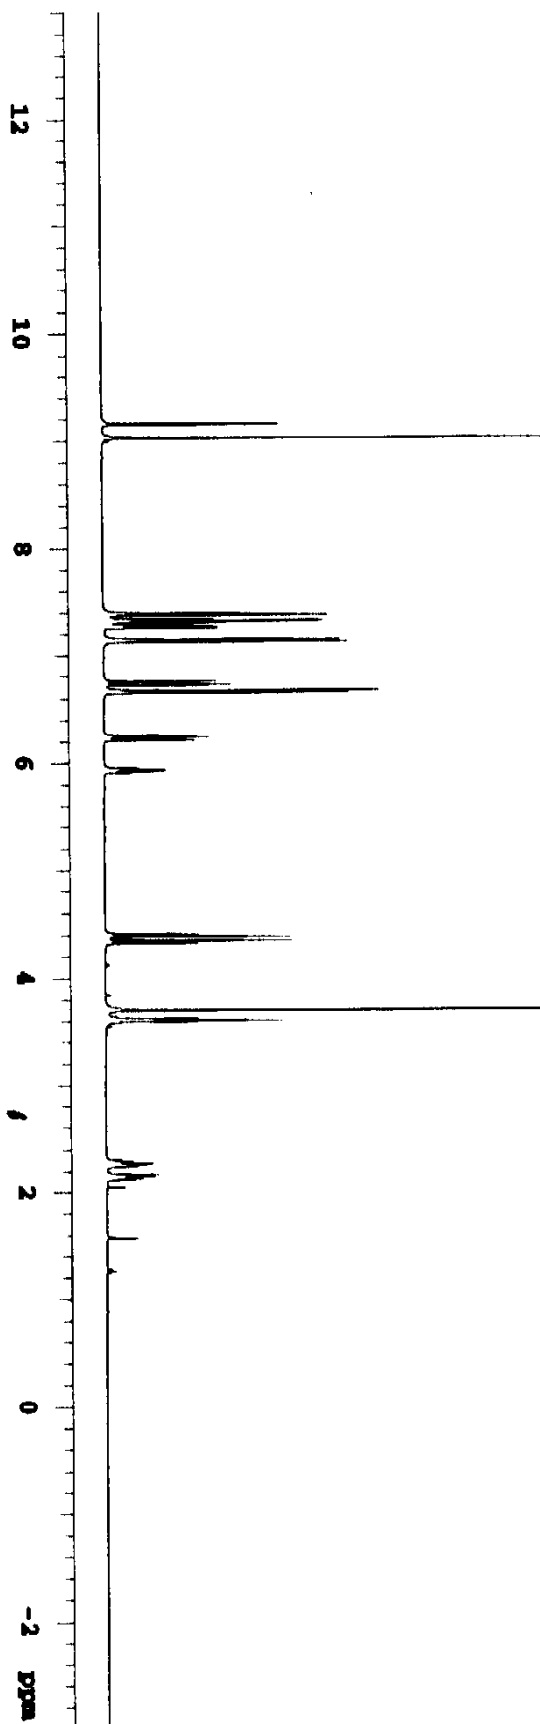

Solvent:  $\text{CDCl}_3$   
 Ambient temperature  
 UNITY-600 "u600"

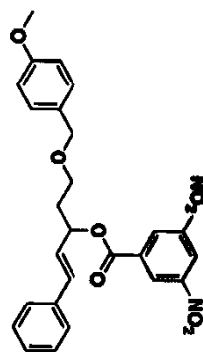

Delay, delay 5.000 sec  
 Pulse 45.0 degrees  
 Acq. time 1.311 sec  
 Width 25000.0 Hz  
 32 repetitions  
 OBSERVE C13, 100.5671591 MHz  
 DECOUPLER H1, 399.9500116 MHz  
 Power 48 dB  
 continuously on  
 WALT-16 modulated  
 DATA PROCESSING  
 Line broadening 1.0 Hz  
 FT size 65536  
 Total time 1 hr, 45 min, 21 sec

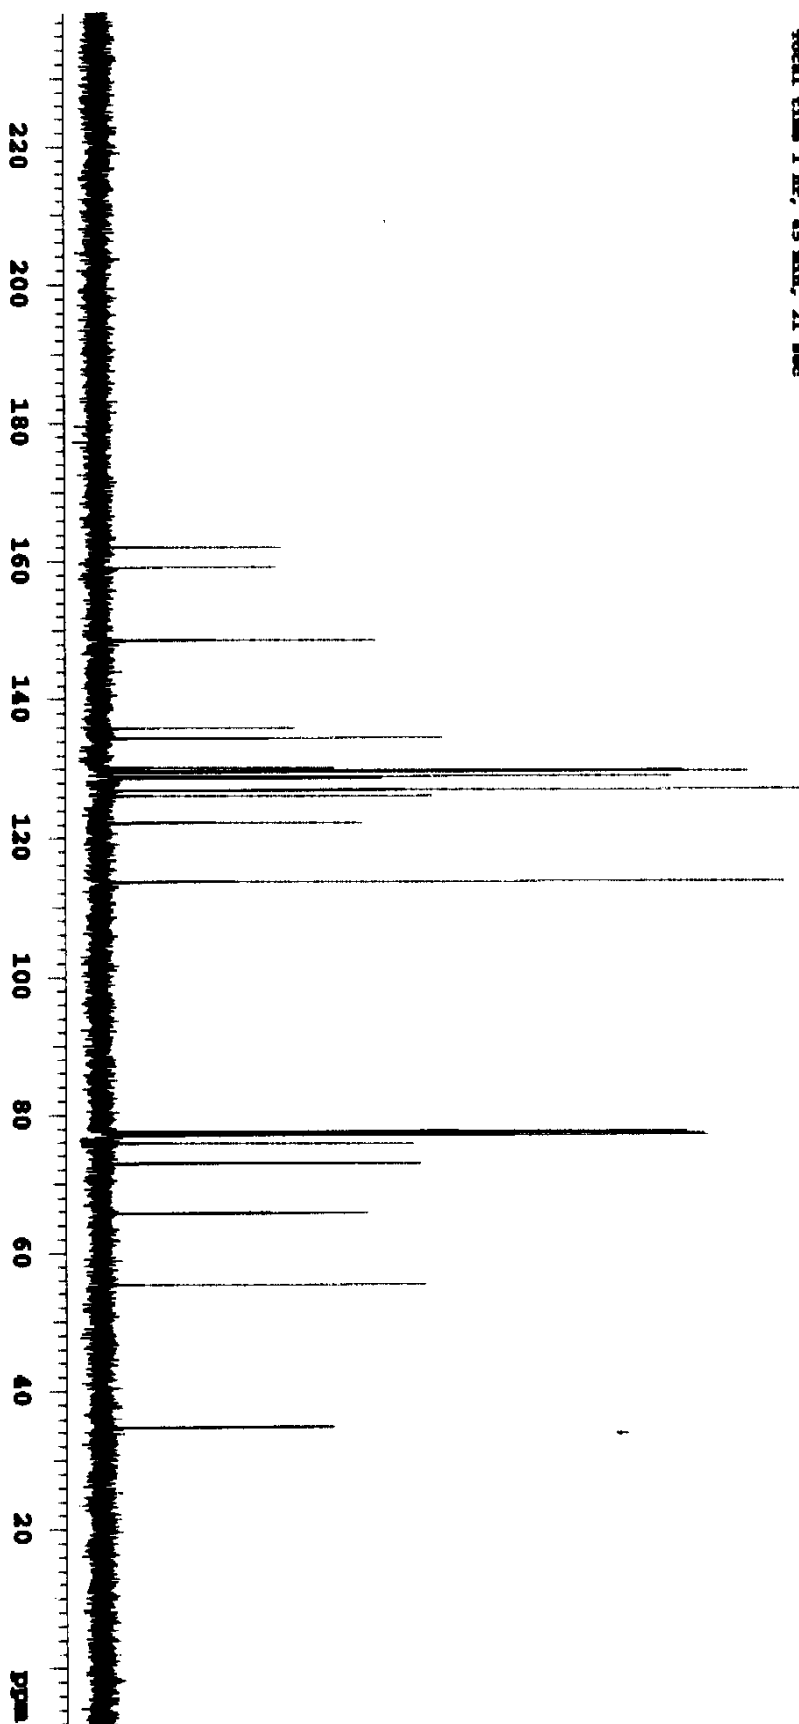

Pulse sequence: zgpg1  
Solvent: CDCl3  
Ambient temperature  
INVT-500 "ul500mb"

Balance delay 15.000 sec  
Pulse 90.0 degrees  
Acq. time 4.096 sec  
Width 8000.0 Hz  
3 repetitions  
OBSERVED 11, 500.0729754 MHz  
DATA PROCESSING  
Line broadening 0.3 Hz  
FT size 65536  
Total time 31 min, 50 sec

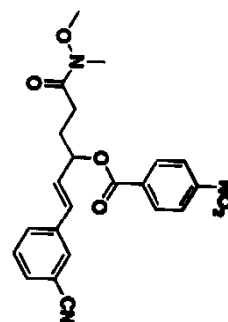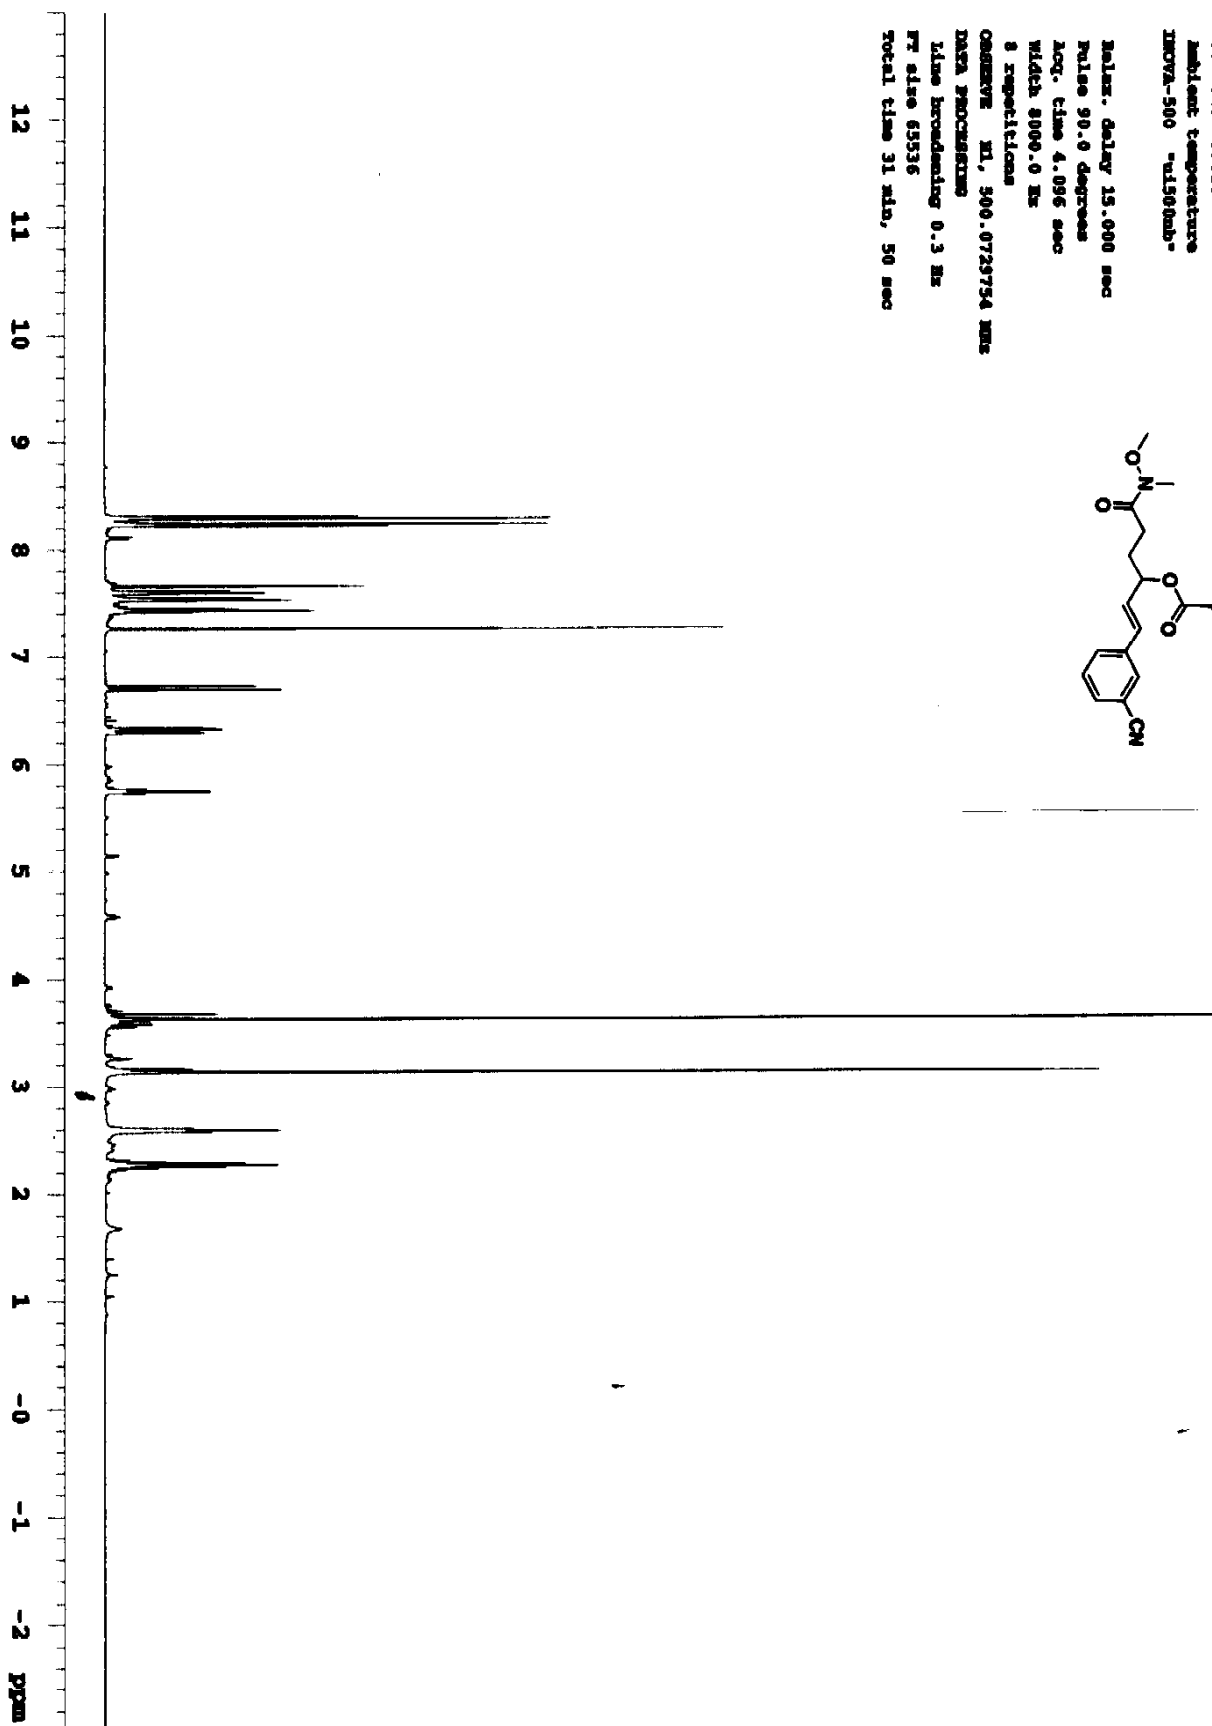



Pulse Sequence: zgpg1

Solvent: CDCl<sub>3</sub>

Ambient Temperature

Acq: 1-14-87

INSTR: 500 "VARIAN"

Pulse: delay 4.000 sec

Pulse 55.4 degrees

Acq. time 1.024 sec

Wdth 32000.0 Hz

40 repetitions

OBSERVE: CL3, 125.583284 MHz

INOCORPIL: H1, 499.437375 MHz

Power 44 dB

continuously on

WALTZ-16 modulated

DATA PROCESSING

Line broadening 1.0 Hz

FF size 65536

Total time 1 hr, 23 min, 54 sec

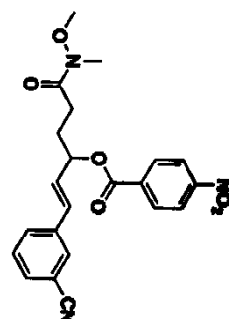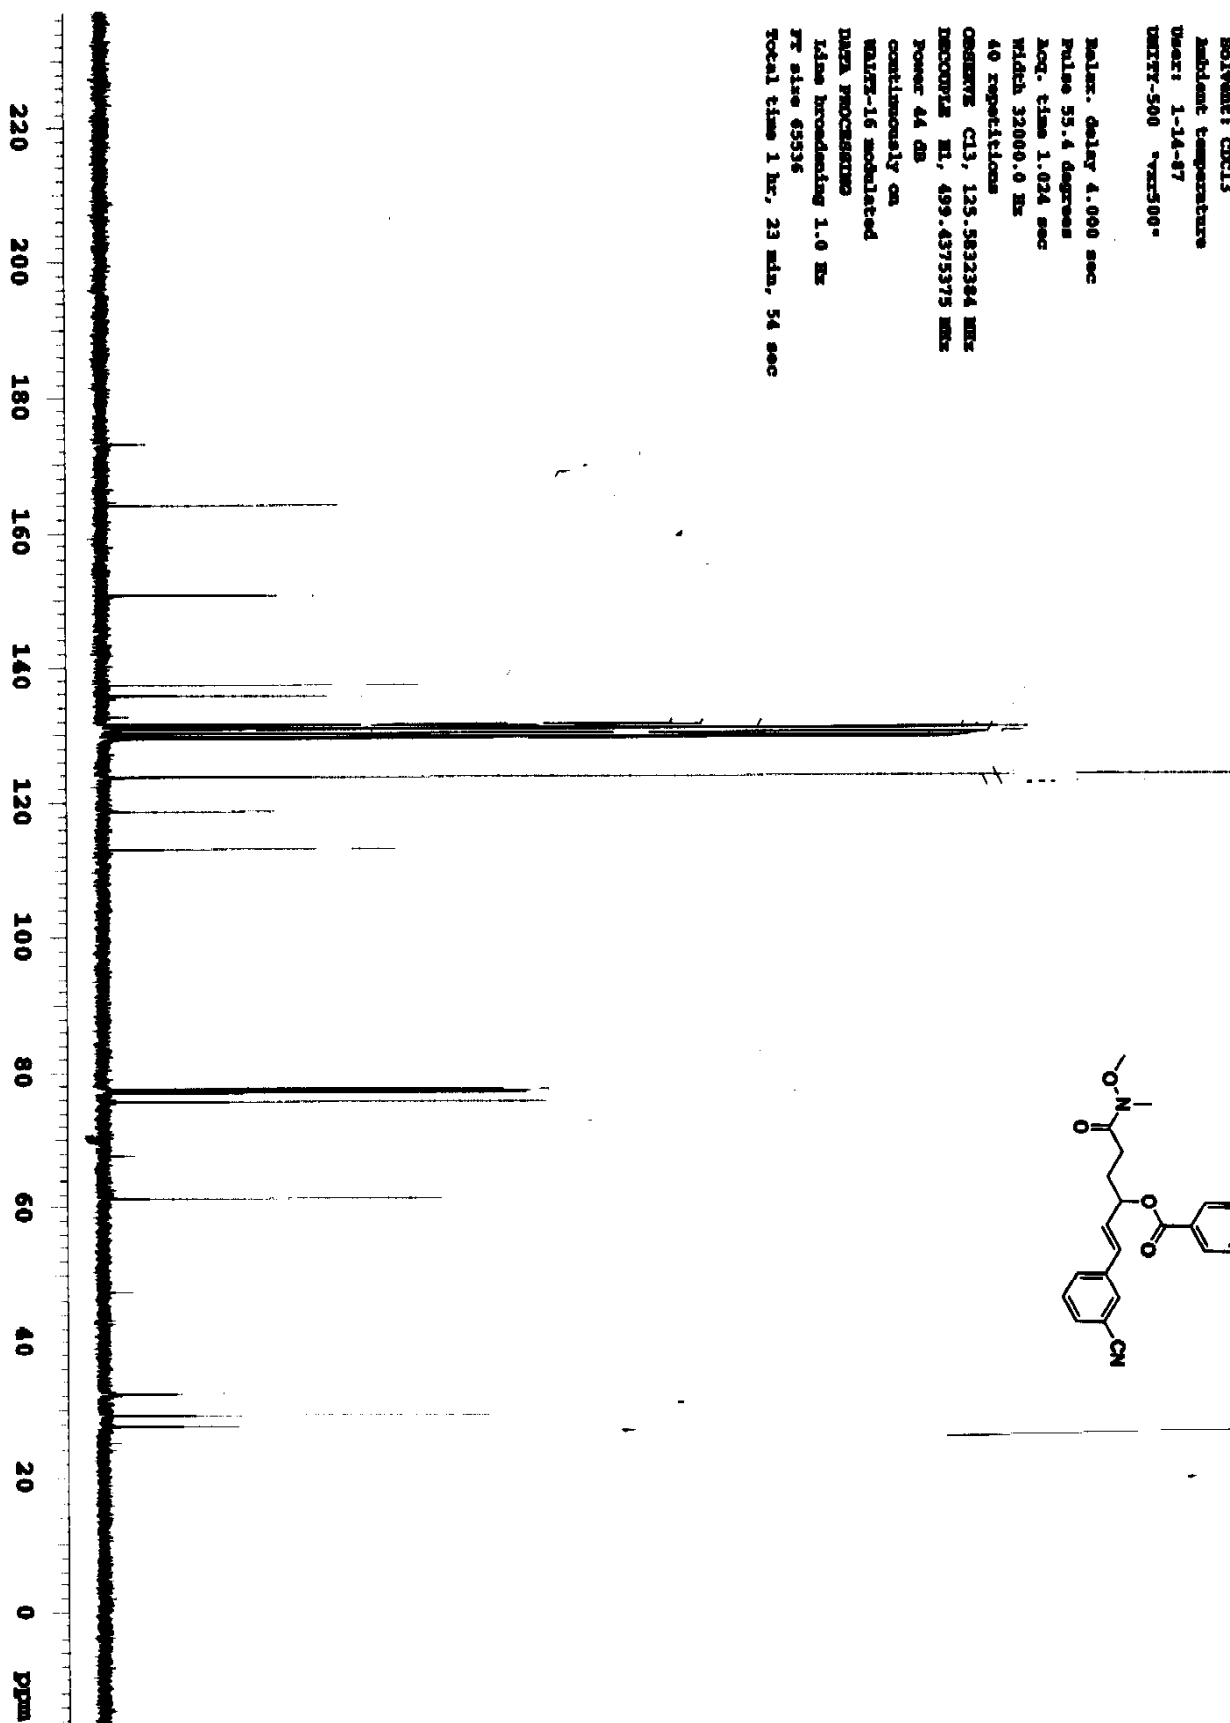

Pulse Sequence: zgpg30  
Solvent: CDCl<sub>3</sub>  
Ambient temperature  
INSTR-500 "4500mb"

Relax. delay 15.000 sec  
Pulse 90.0 degrees  
Acq. time 4.096 sec  
Width 8000.0 Hz  
# repetitions  
OBSERVE H1, 500.0729754 MHz  
DATA PROCESSING  
Line broadening 0.3 Hz  
F2 size 65536  
Total time 31 min, 50 sec

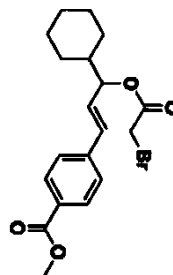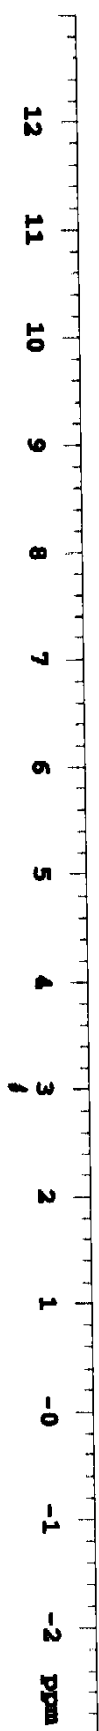

Pulse Sequence: zgpg30

Solvent: CDCl<sub>3</sub>

Ambient temperature

User: 1-14-87

INSTR: 500 "vnm500"

Pulse: delay 2.000 sec

Pulse 42.4 degrees

Acq. time 1.024 sec

Width 3200.0 Hz

166 repetitions

Observed C13, 125.5832247 MHz

Decoupled H1, 499.4375375 MHz

Power 44 dB

continuously on

WALTZ-16 modulated

DATA PROCESSING

Line broadening 1.0 Hz

RG also 63536

Total time 50 min, 34 sec

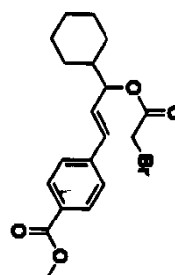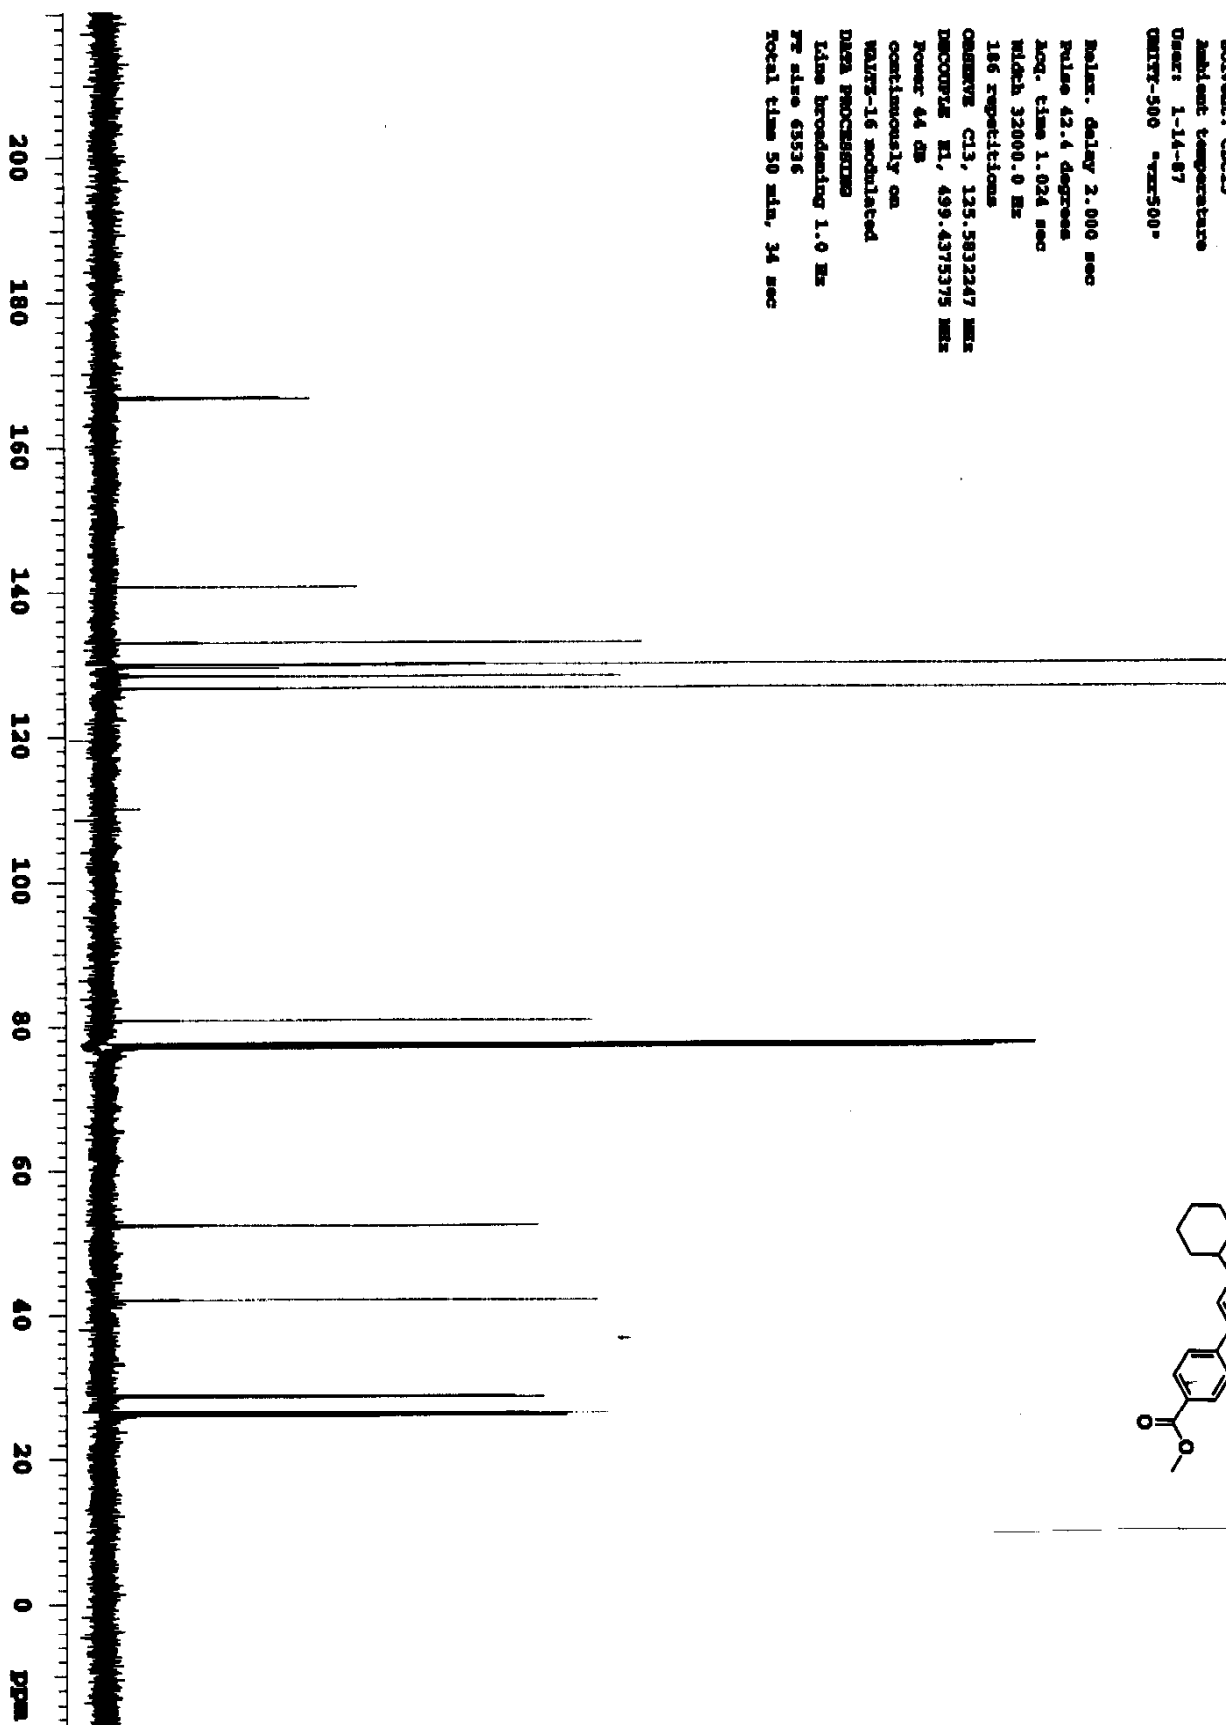

Pulse Sequence: zgpg1

Solvent: CDCl<sub>3</sub>

Ambient Temperature

UNIF-500 "Var500"

Relax. delay 15.000 sec

Pulse 45.0 degrees

Acq. time 4.096 sec

Width 8000.0 Hz

4 repetitions

OBSERVED F1, 499.4356718 MHz

DATA PROCESSING

Line broadening 0.3 Hz

F2 also 65536

Total time 31 min, 50 sec

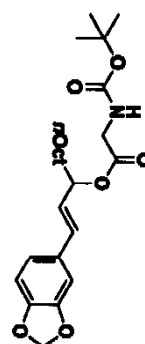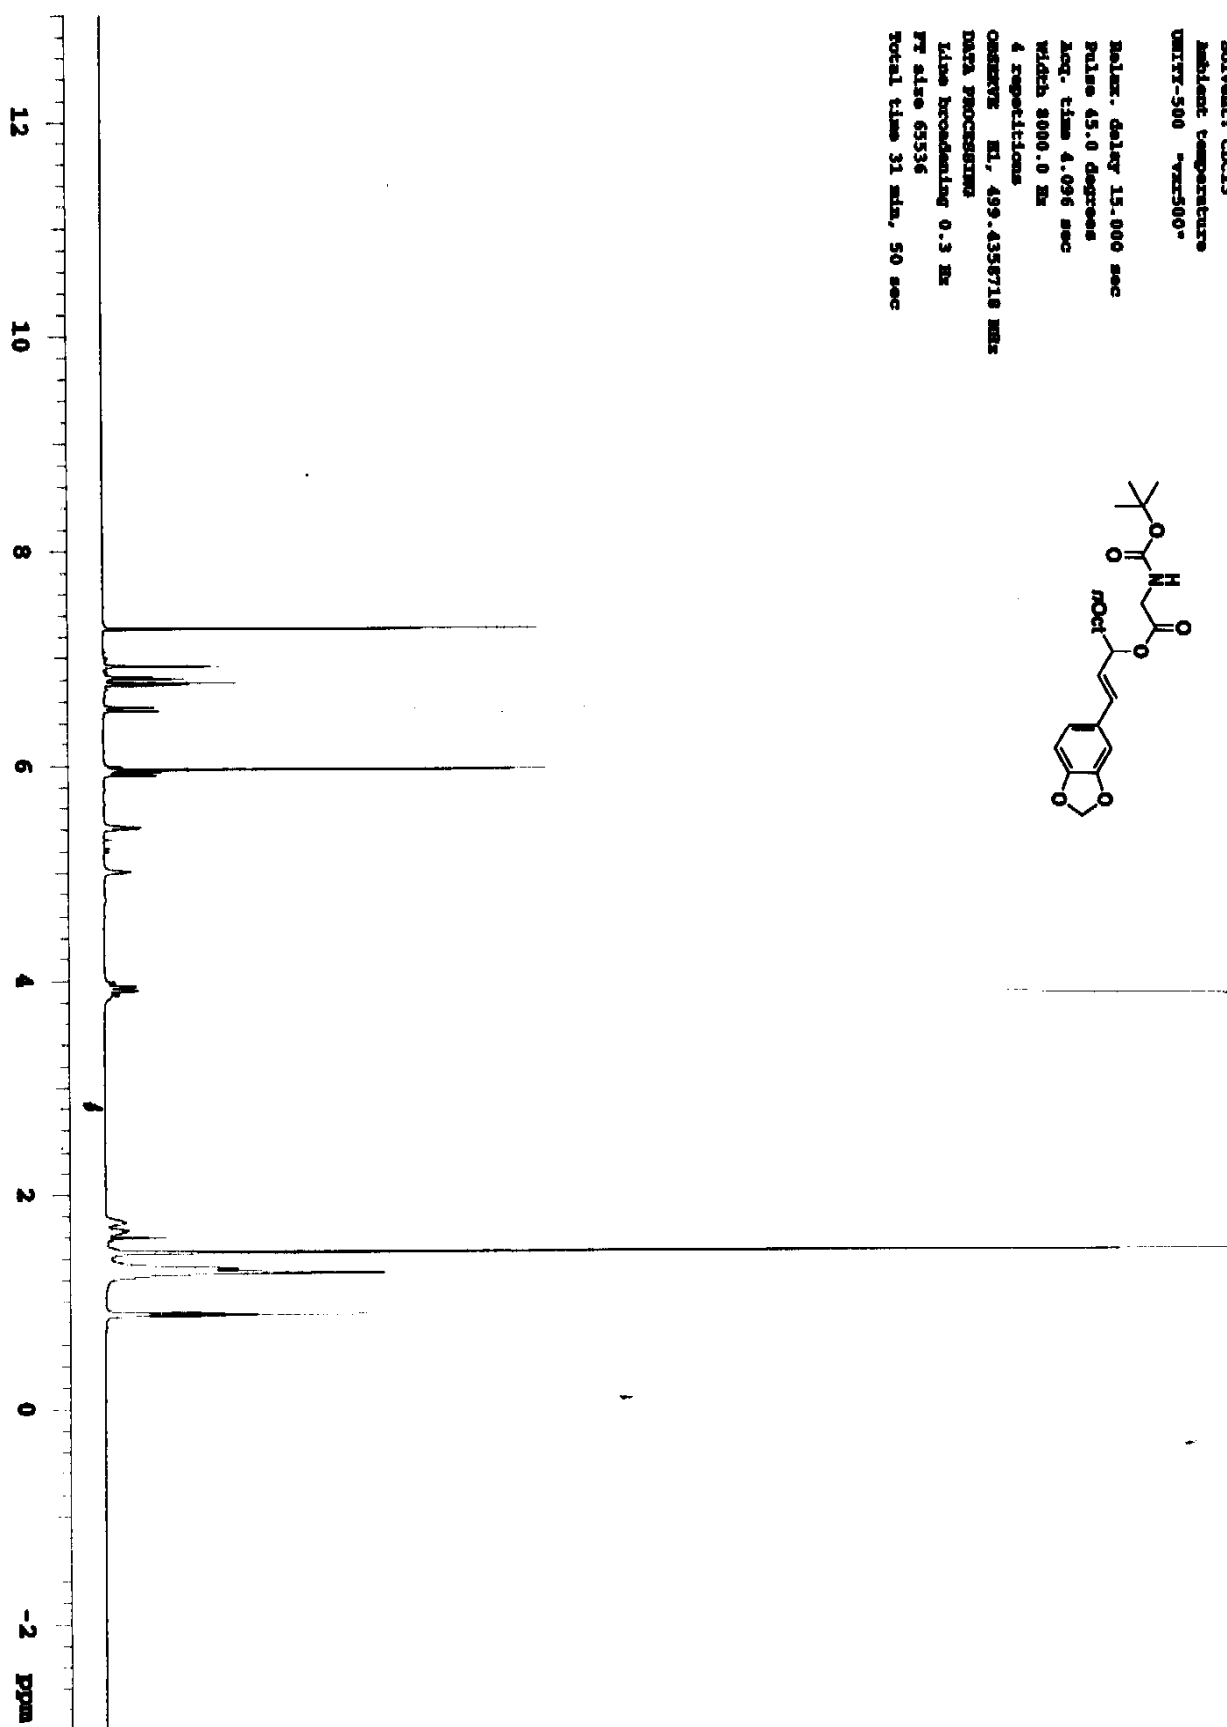

Pulse Sequence: zgpg1

Solvent: CDCl<sub>3</sub>

Ambient temperature

UNIT-400 "400"

Pulse delay 2.000 sec

Pulse 45.0 degrees

Acq. time 1.311 sec

Width 25000.0 Hz

664 repetitions

OBSERVE C13, 100.5671538 MHz

DECOUPLE H1, 399.3500118 MHz

Power 48 dB

continuously on

MAGN-16 isolated

DATA PROCESSING

Line broadening 1.0 Hz

F2 file 65536

Total time 55 min, 21 sec

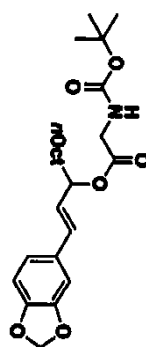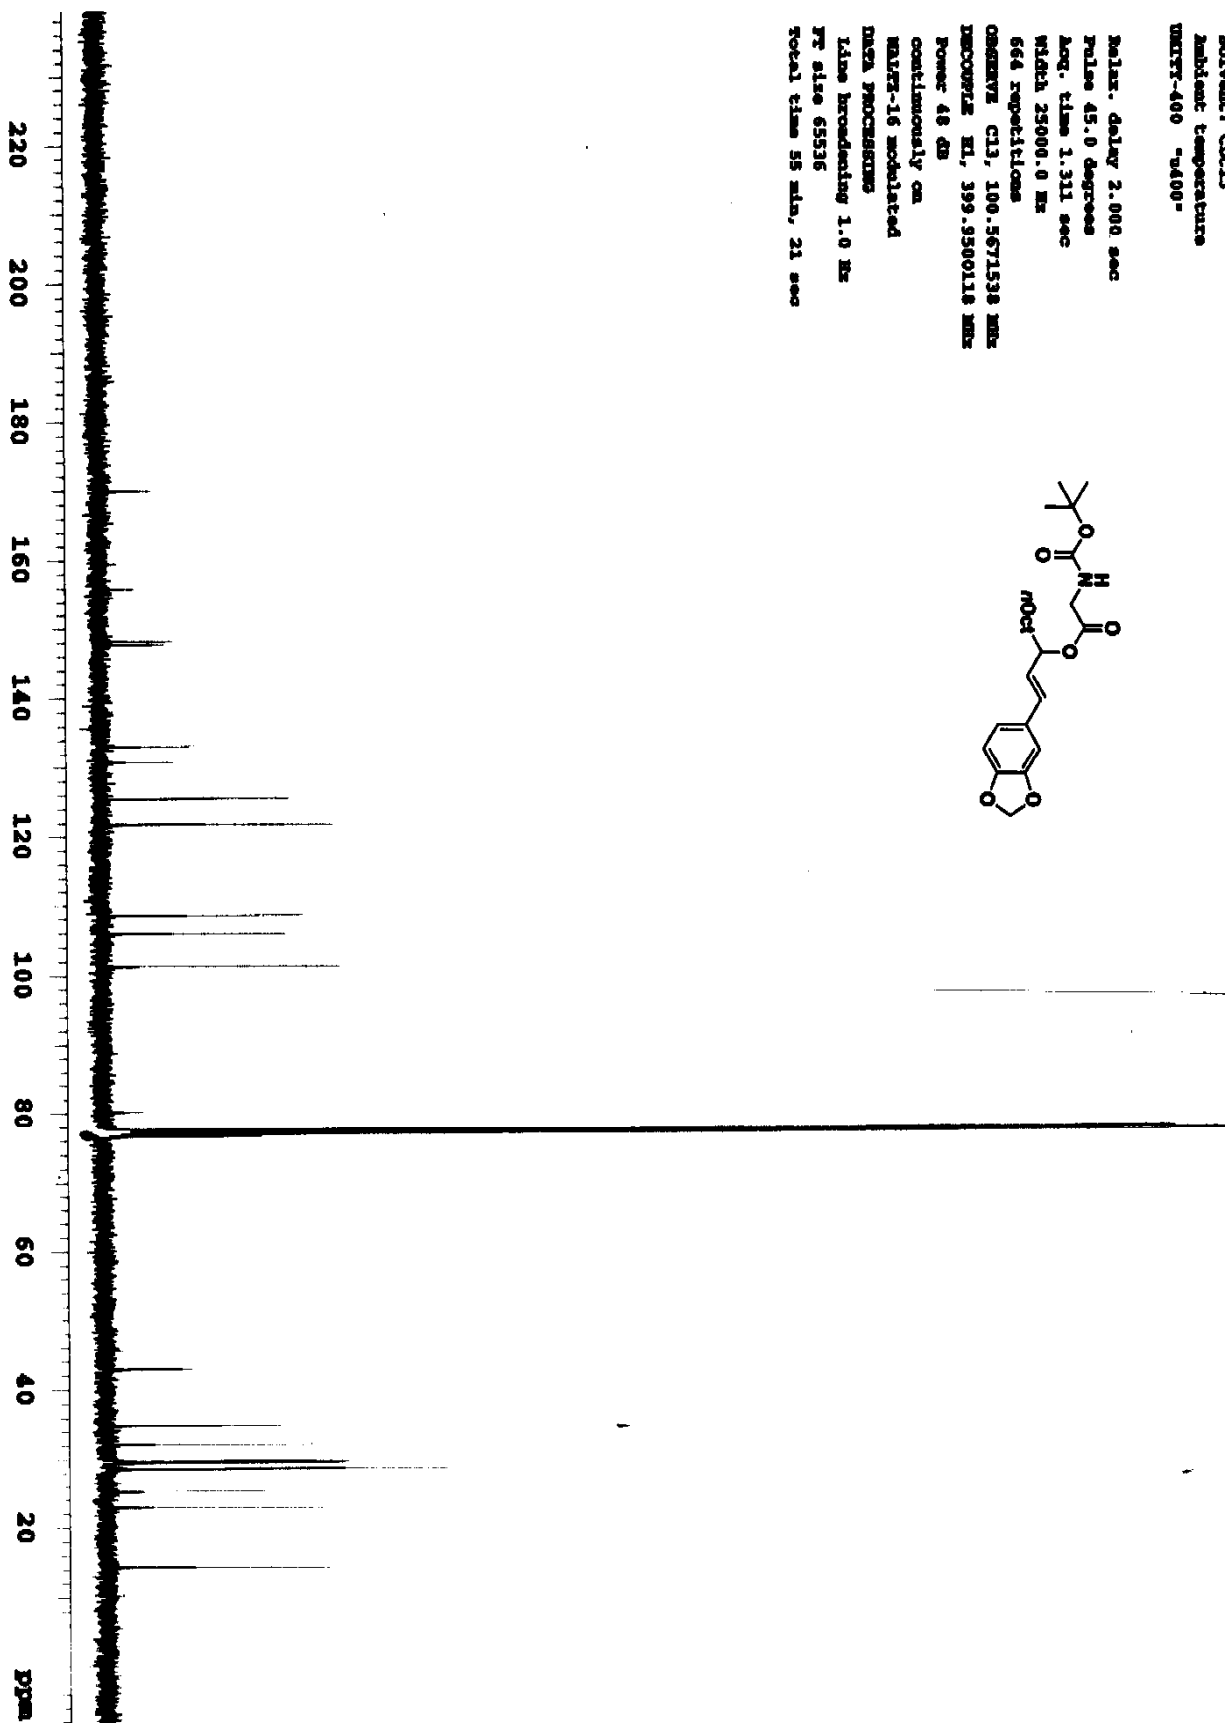

Pulse Sequence: zgpg30  
Solvent: CDCl<sub>3</sub>  
Ambient temperature  
UNIT-400 "u400"

Pulse 45.0 degrees  
Acq. time 4.096 sec  
width 8000.0 Hz  
12 repetitions  
OBSERVE XL, 399.946787 MHz  
DATA PROCESSING  
Time preceding 0.3 Hz  
FT size 65536  
Total time 6 min, 50 sec

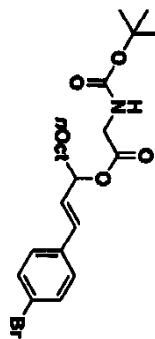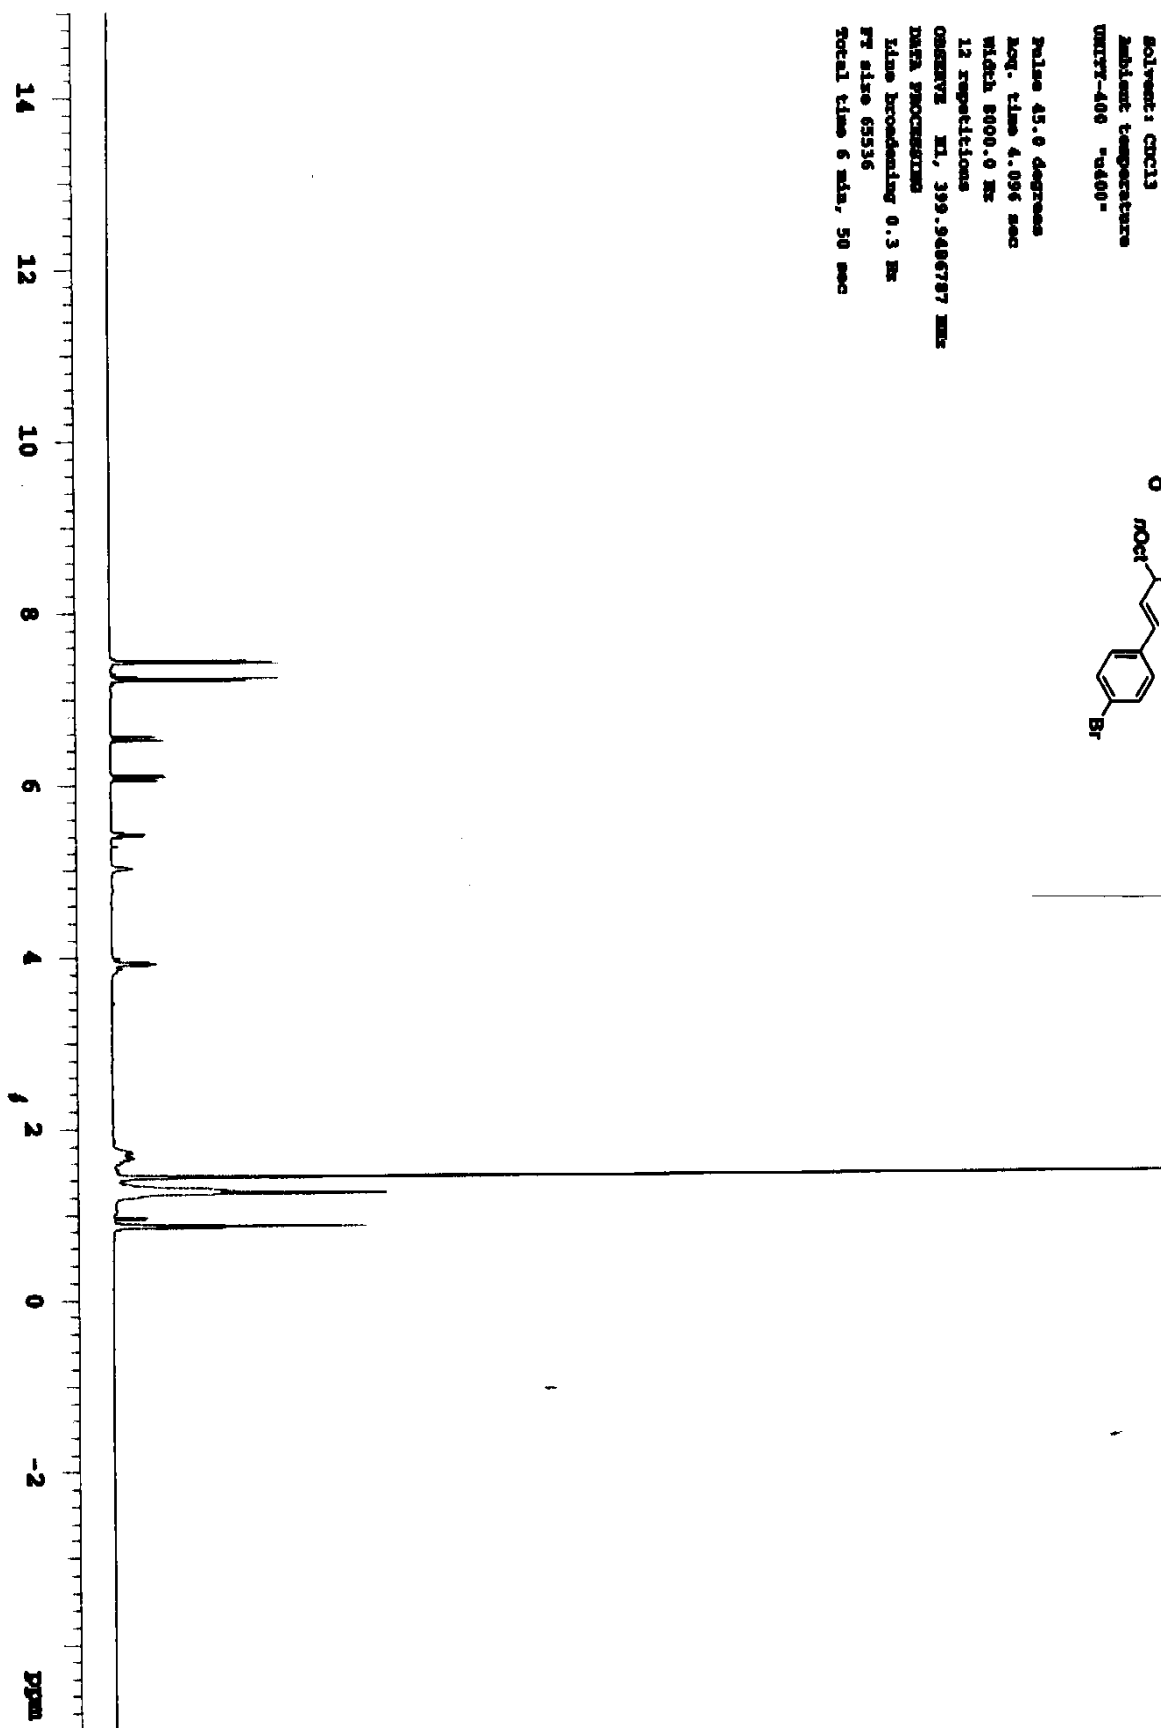

Pulse Sequence: zgpg1  
Solvent: CHCl<sub>3</sub>  
Ambient Temperature  
PMT-400 "w400"

Relax. delay 1.000 sec  
Pulse 45.0 degrees  
Acq. time 1.311 sec  
Width 25000.0 Hz  
56 repetitions  
OBSERVE CH3, 100.5671606 MHz  
INOCURVX RL, 399.9500118 MHz  
Power 48 dB  
continuously on  
NUC1-16 modulated  
DATA PROCESSING  
Line broadening 1.0 Hz  
FT size 65536  
Total time 38 min, 41 sec

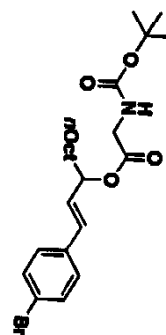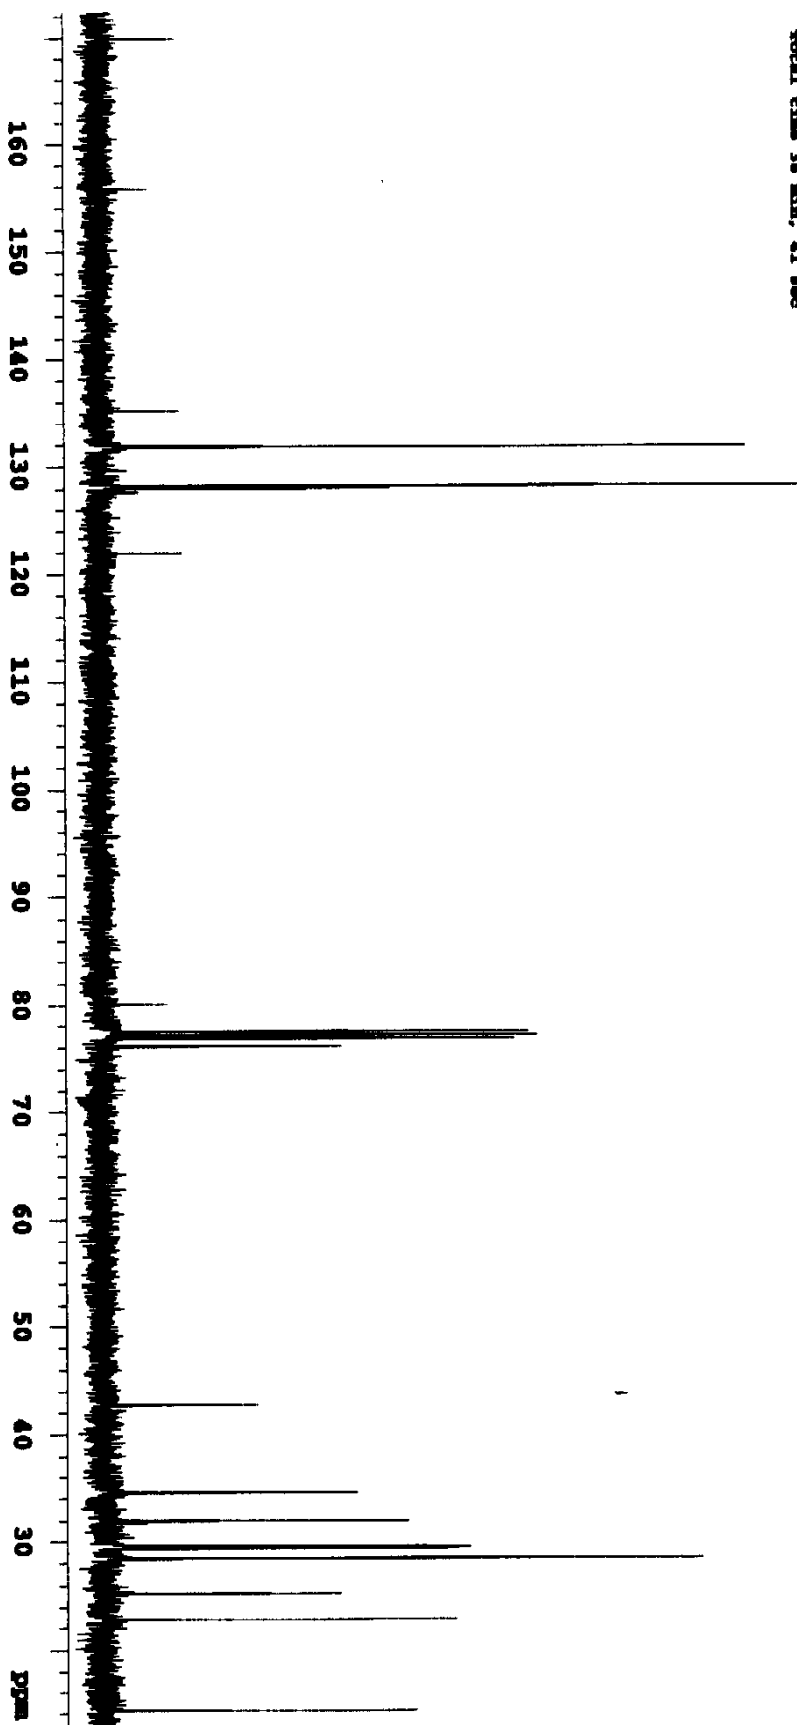

Pulse Sequence: zgpg30  
Solvent: CDCl3  
Ambient temperature  
UNREF-400 "u400"

Pulse 45.0 degrees  
Acq. time 4.096 sec  
Width 8000.0 Hz  
16 repetitions  
OBSERVE H1, 399.9486787 MHz  
DATA PROCESSING  
Line broadening 0.3 Hz  
FT size 65536  
Total time 6 min, 50 sec

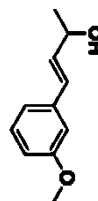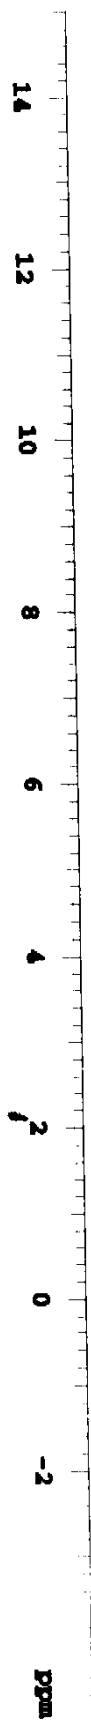



Pulse Sequence: zgpg1  
Solvent: CDCl3  
Ambient temperature  
PULPRO-400 "4400"

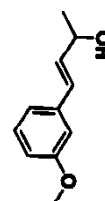

Relax. delay 1.000 sec  
Pulse 45.0 degrees  
Acq. time 1.311 sec  
Width 25000.0 Hz  
160 repetitions  
OBSERVE C13, 100.5671583 MHz  
DECOUPLE H1, 399.3500118 MHz  
Power 48 dB  
continuously on  
WALTZ-16 modulated  
DATA PROCESSING  
Line broadening 1.0 Hz  
RG size 65536  
Total time 38 min, 41 sec

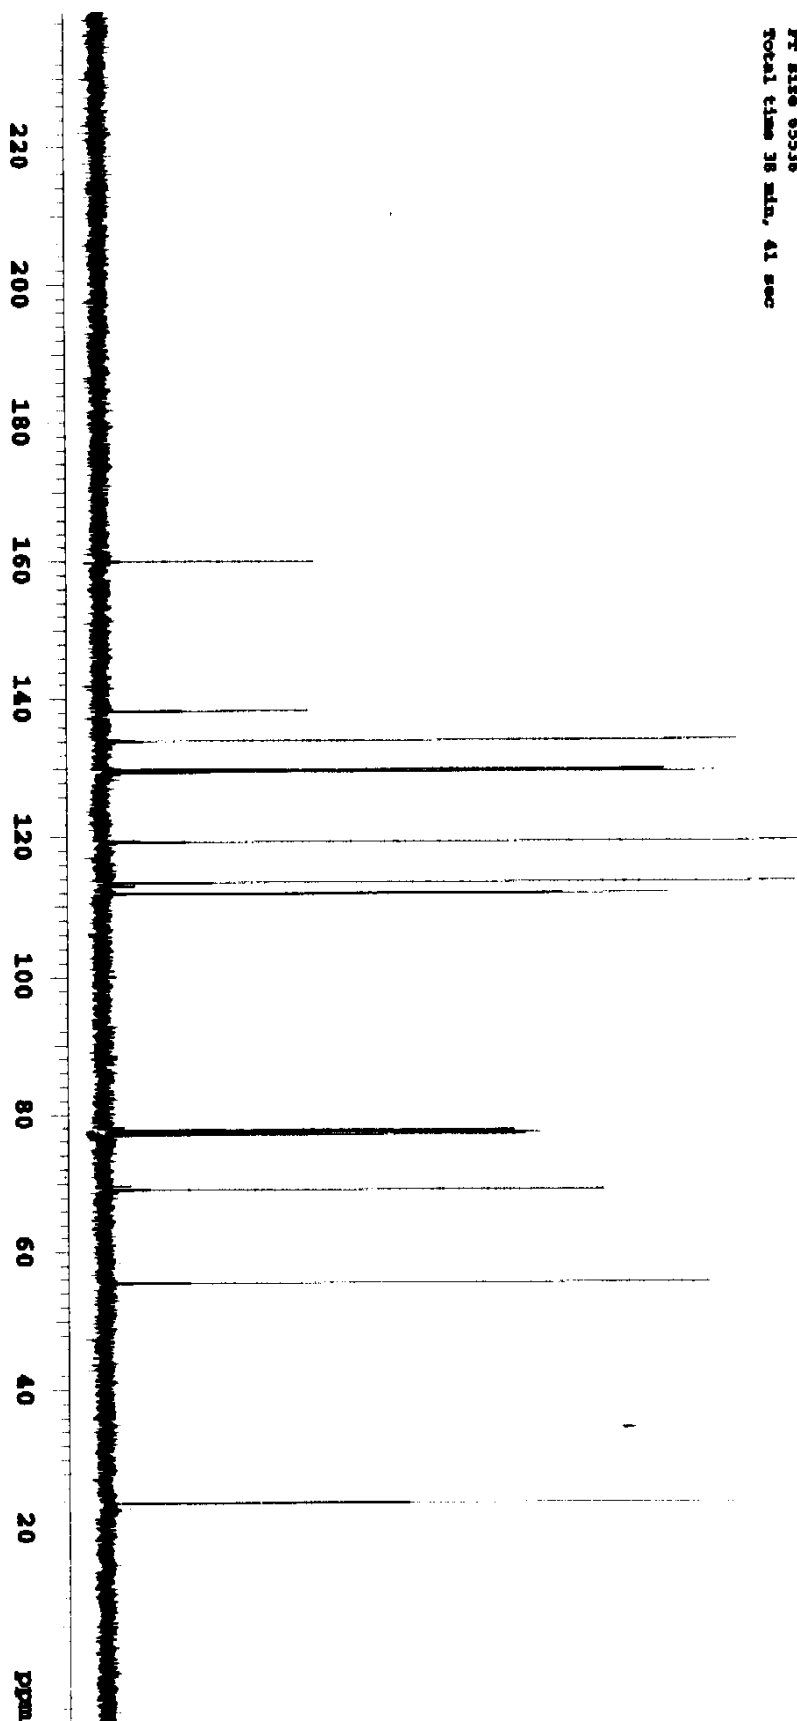

Pulse Sequence: s2pul  
Solvent: CDCl<sub>3</sub>  
Ambient temperature  
File: IIRjhd43.H1.C2  
INOVA-500 "sundsl"

Relax. delay 15.000 sec  
Pulse 45.0 degrees  
Acq. time 4.096 sec  
Width 8000.0 Hz  
8 repetitions  
OBSERVE H1, 399.9486787 MHz  
DATA PROCESSING  
Line broadening 0.3 Hz  
FT size 65536  
Total time 31 min, 50 sec

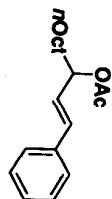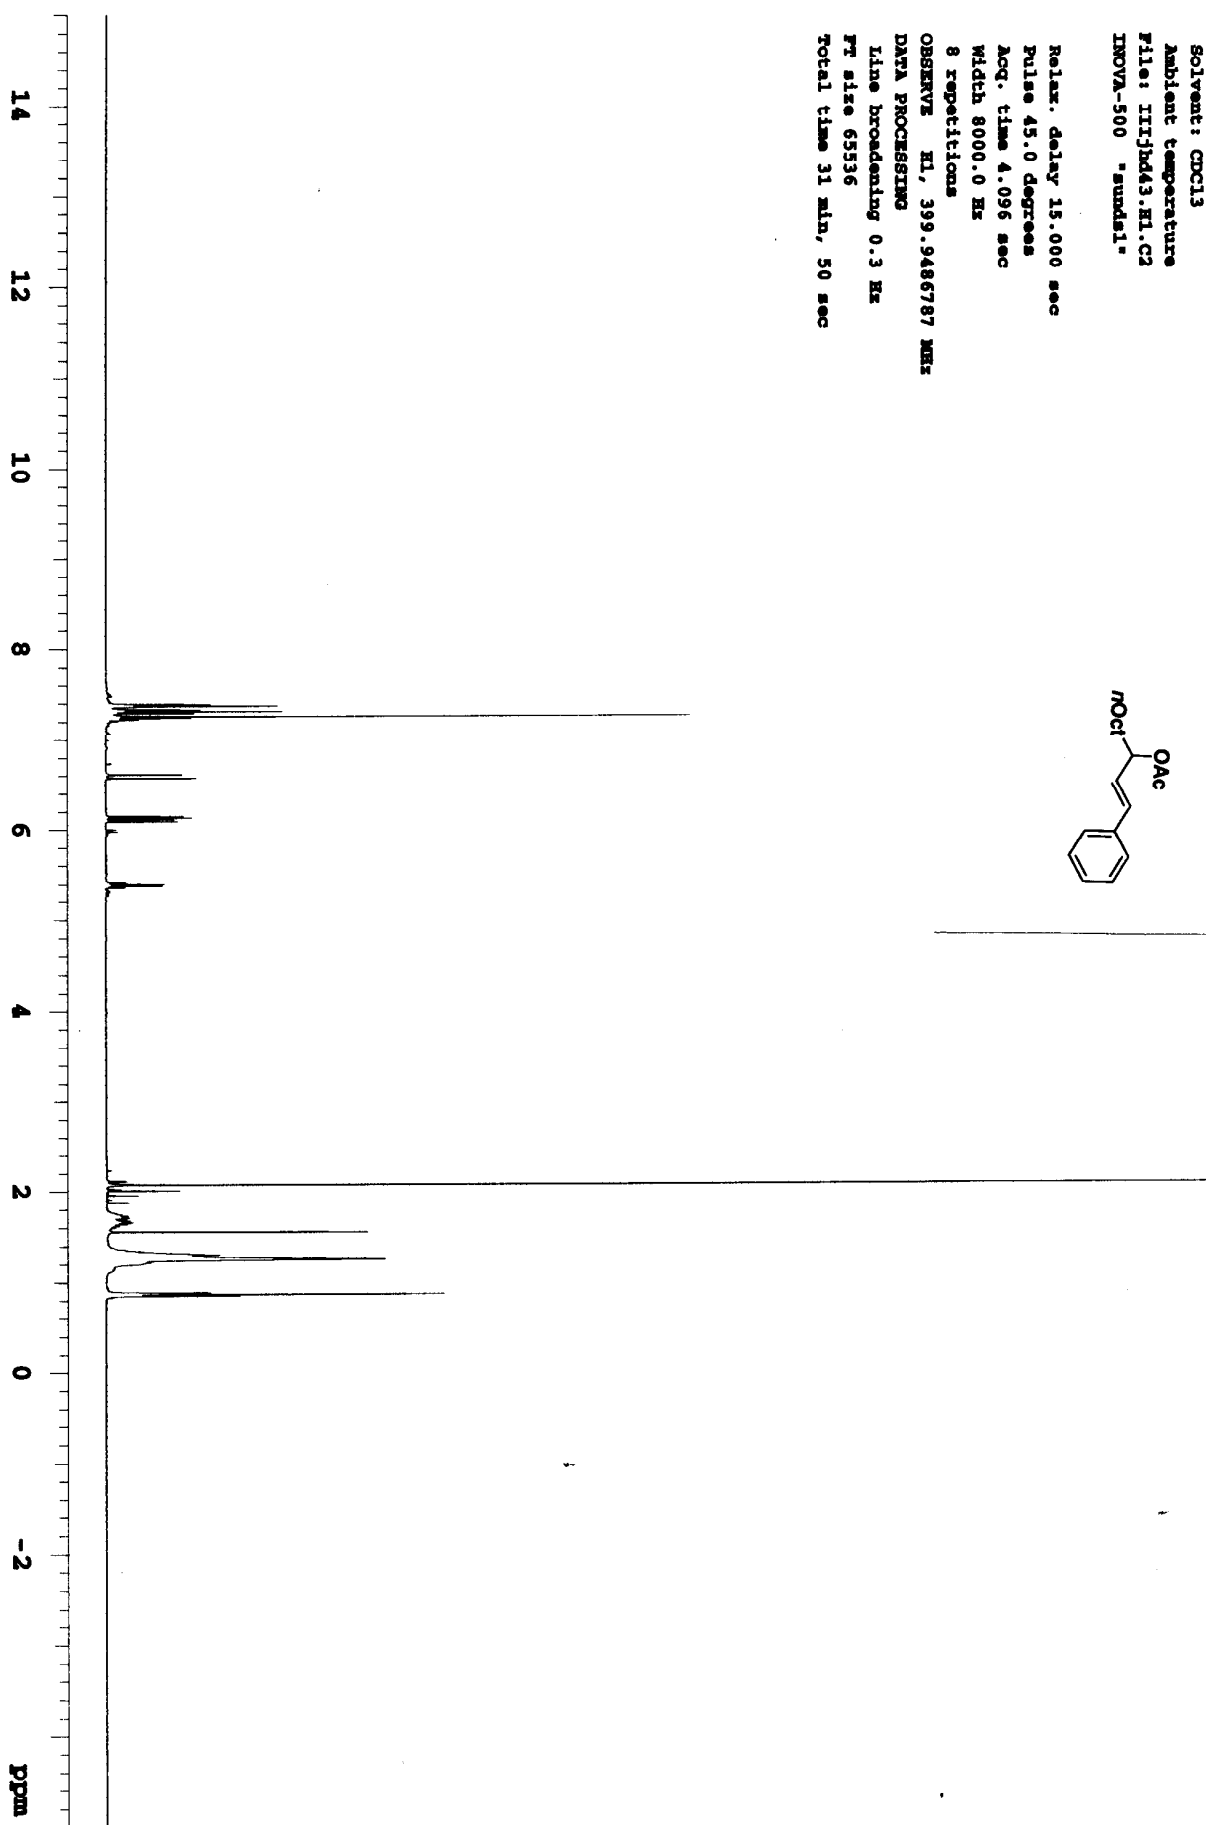

Pulse Sequence: s2pul

Solvent: CDCl<sub>3</sub>

Ambient temperature

UNITY-400 "n400"

Relax. delay 2.000 sec

Pulse 45.0 degrees

Acq. time 1.311 sec

Width 25000.0 Hz

104 repetitions

OBSERVE C13, 100.5671512 MHz

DECOUPLE H1, 399.9500118 MHz

Power 48 dB

continuously on

WALTZ-16 modulated

DATA PROCESSING

Line broadening 1.0 Hz

FT size 65536

Total time 55 min, 21 sec

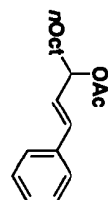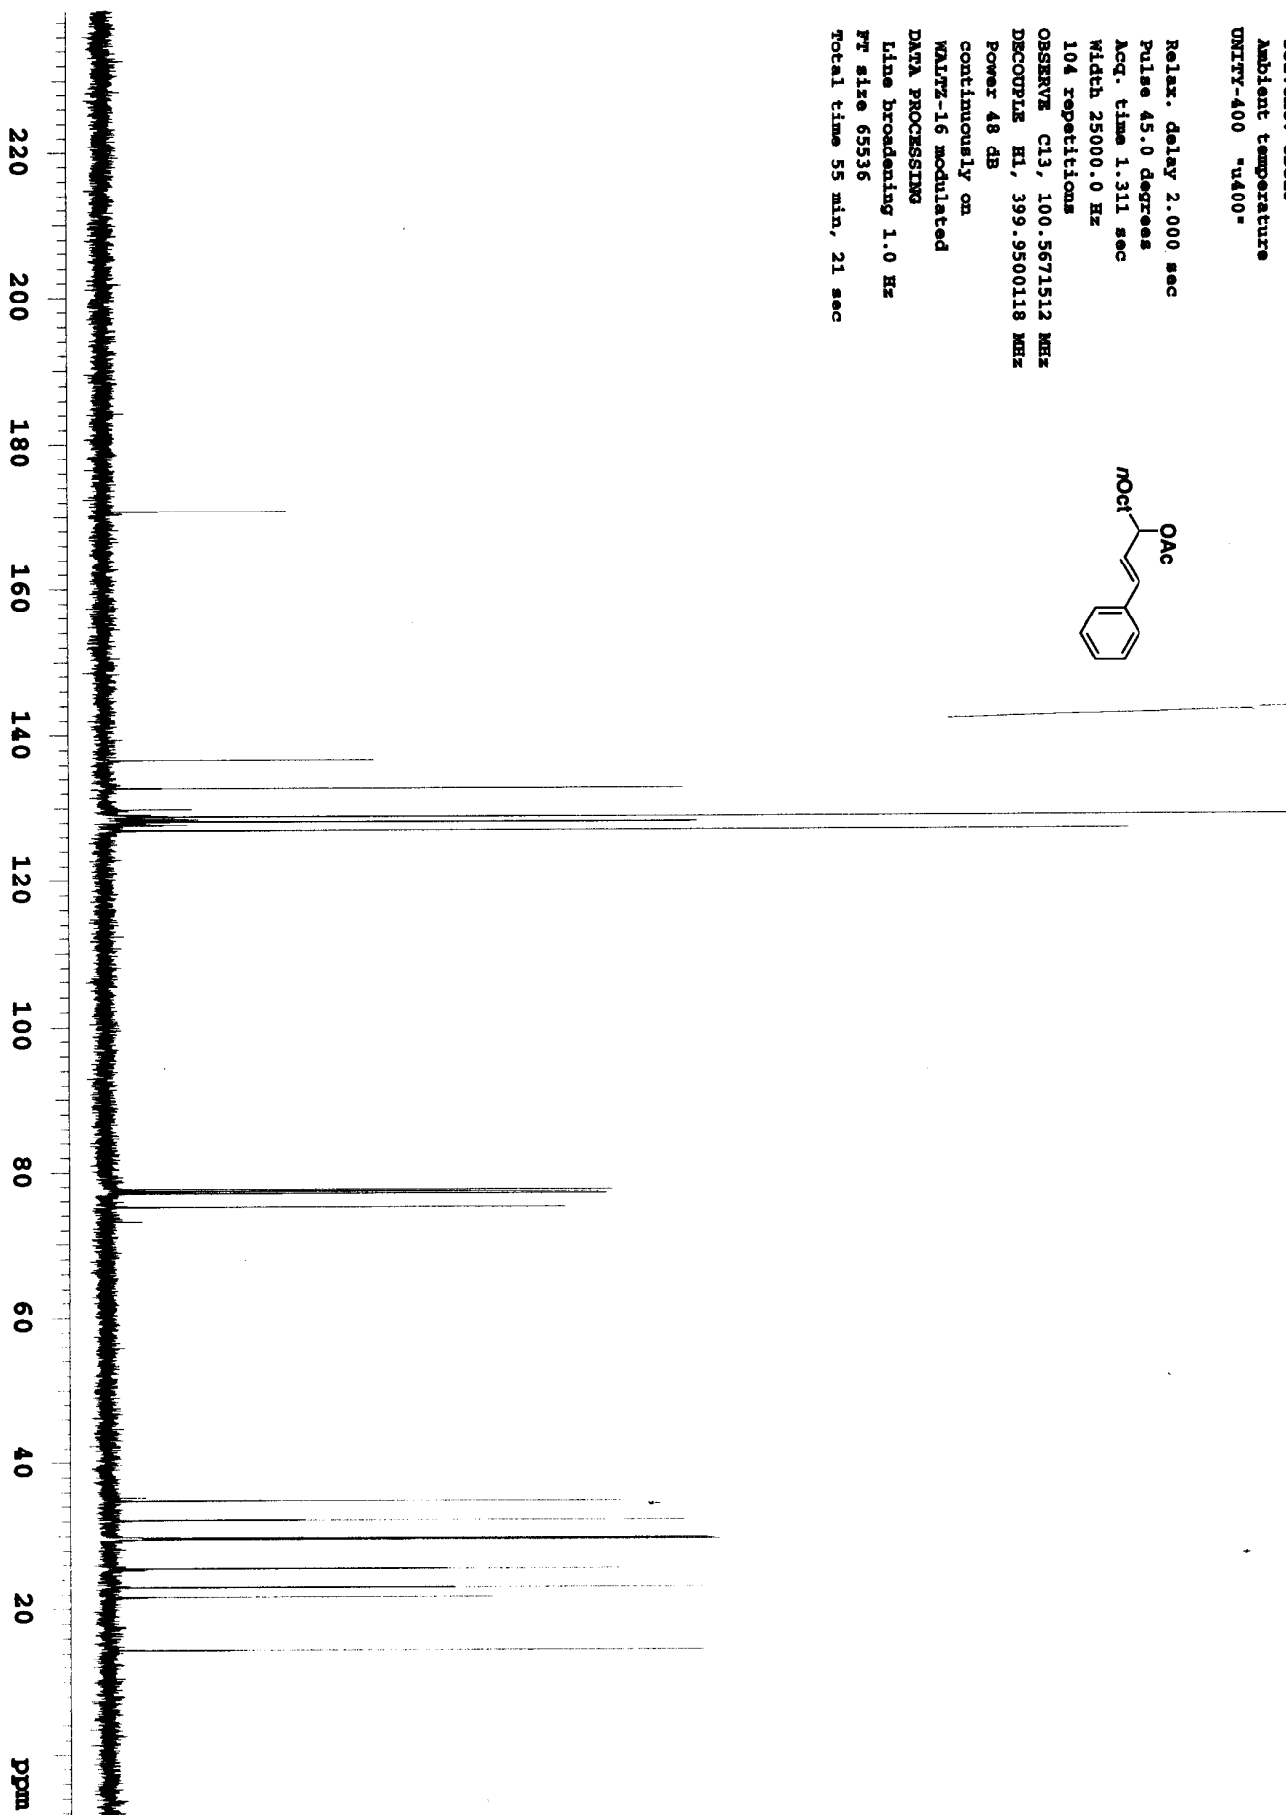

Pulse Sequence: zgpg1

Solvent: CDCl<sub>3</sub>

Ambient Temperature

UNREF-400 "v4.00"

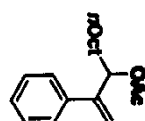

Pulse 45.0 degrees

Acq. time 4.096 sec

Width 3000.0 Hz

12 repetitions

OBSERVE M, 399.3486787 MHz

DATA PROCESSING

Line broadening 0.3 Hz

FT size 65536

Total time 6 min, 50 sec

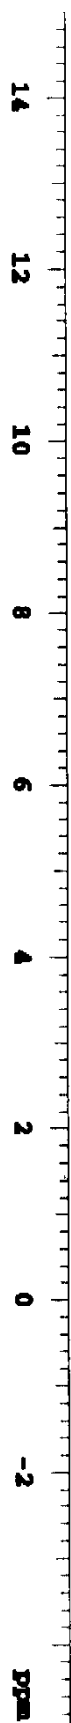

Pulse Sequence: zgpg1

Solvent: CDCl<sub>3</sub>

Ambient temperature

User: J-14-87

UNIT-500 "VARI-500"

Pulse delay 2.000 sec

Pulse 55.4 degrees

Acq. time 1.024 sec

Width 3200.0 Hz

56 repetitions

OBSERVE C13, 125.583227 MHz

INCOUPLE H1, 499.437575 MHz

Power 44 dB

continuously on

NMR-16 modulated

DATA PROCESSING

F2 line broadening 1.0 Hz

F2 size 65536

Total time 50 min, 34 sec

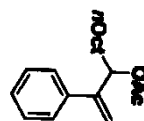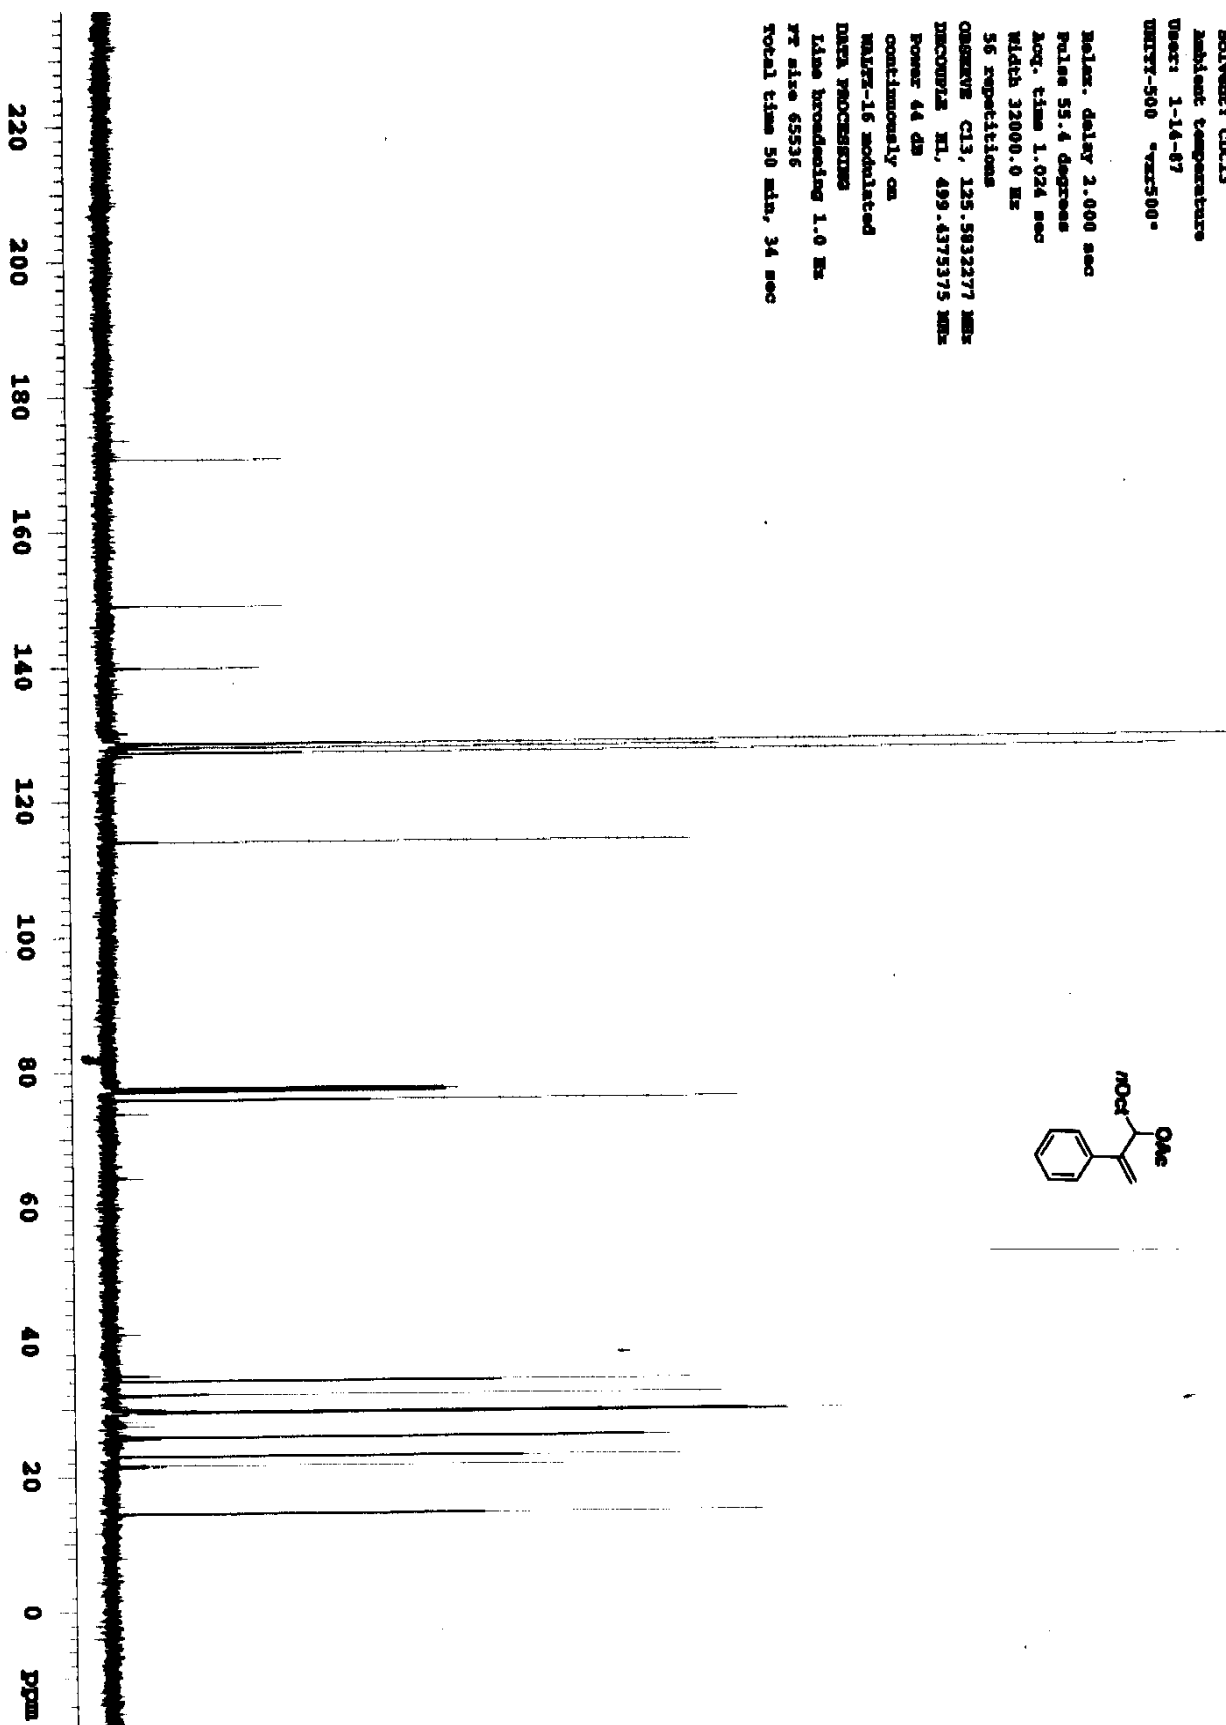

Pulse sequence: zgpg30  
Solvent: CDCl<sub>3</sub>  
Ambient temperature  
UNITS-400 "u400"

Relax. delay 15.000 sec  
Pulse 45.0 degrees  
Acq. time 4.096 sec  
Width 8000.0 Hz  
4 repetitions  
OBSERVE H1, 399.9486810 MHz  
DATA PROCESSING  
Line broadening 0.3 Hz  
FT size 65536  
Total time 31 min, 50 sec

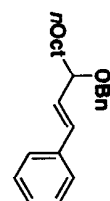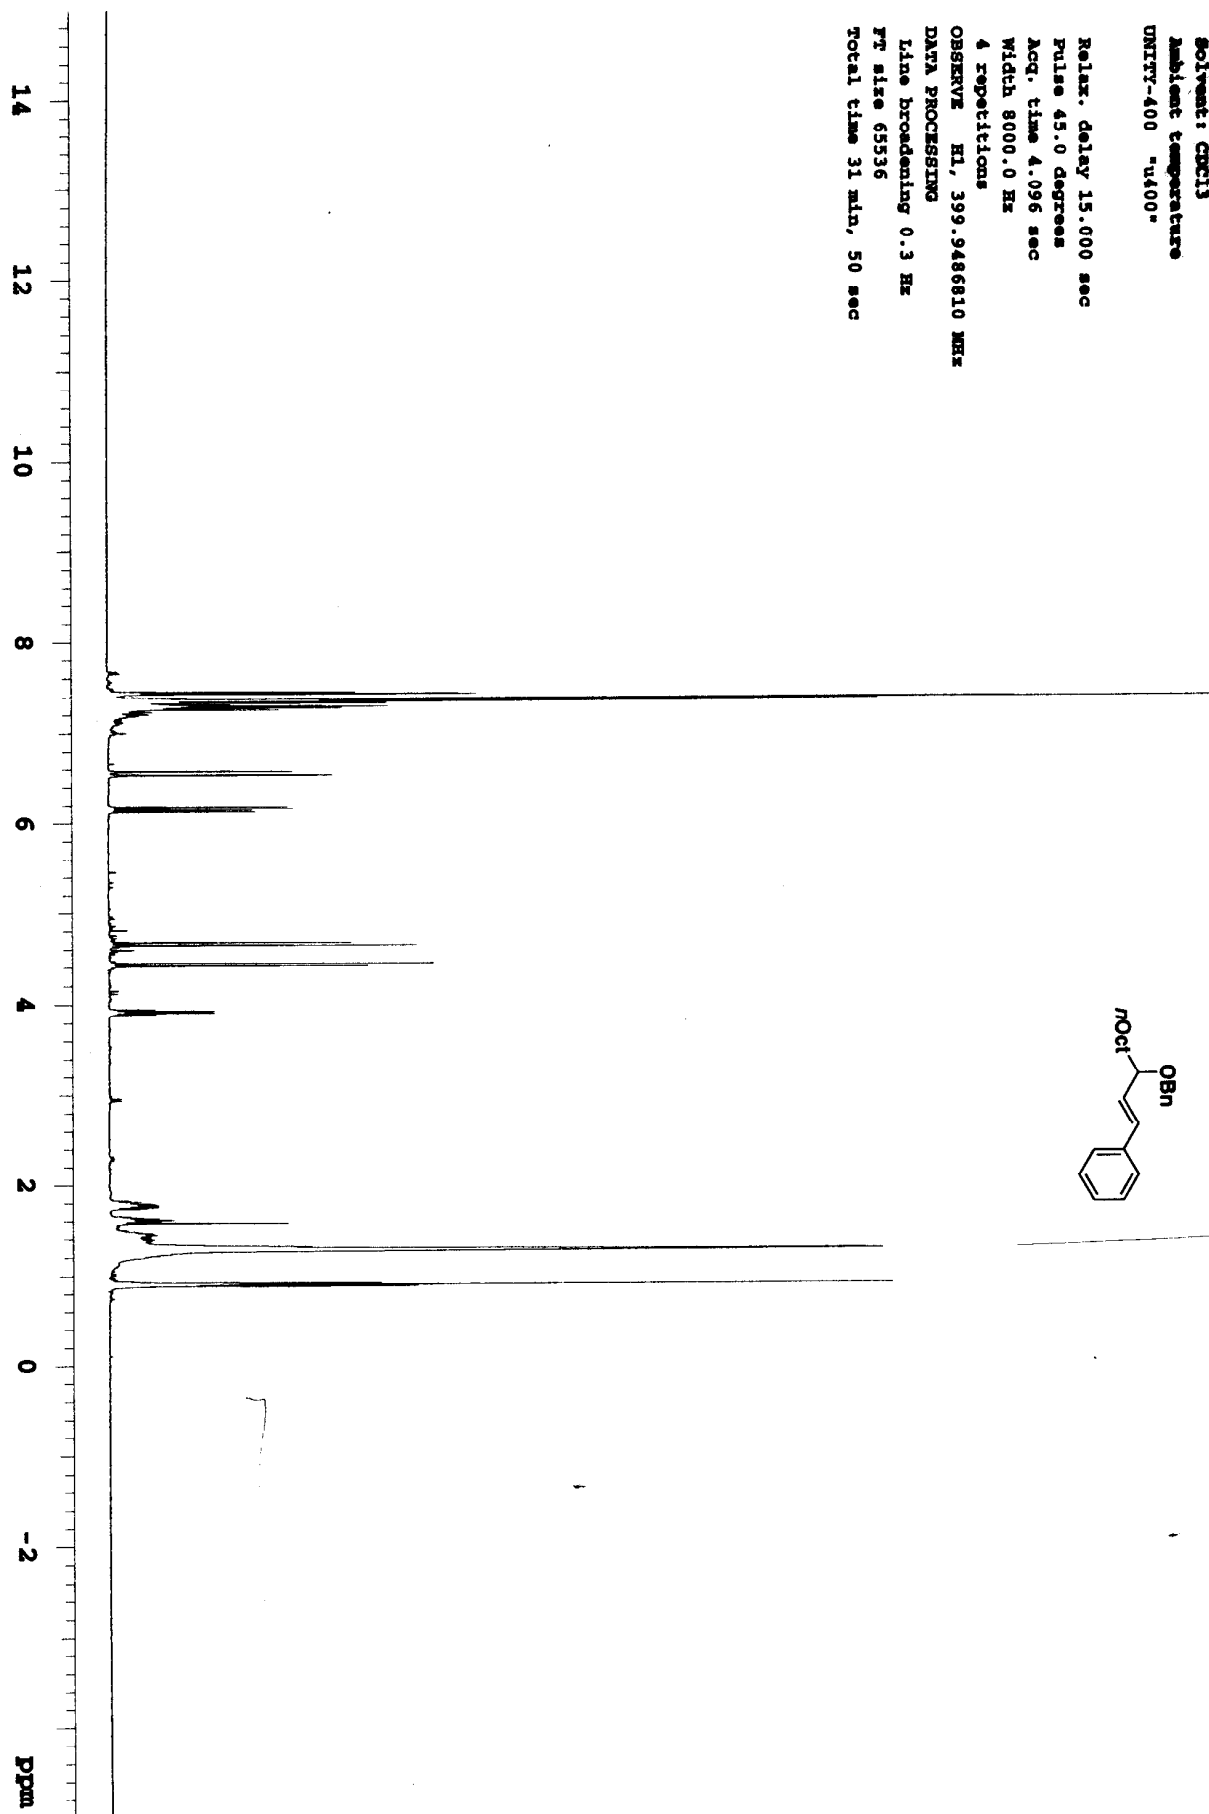

Pulse sequence: zgpg30  
Solvent: CDCl<sub>3</sub>  
Ambient temperature  
UNITY-400 "u400"

Relax. delay 3.000 sec  
Pulse 45.0 degrees  
Acq. time 1.311 sec  
Width 25000.0 Hz  
80 repetitions  
OBSERVE C13, 100.5671512 MHz  
DECOUPLE H1, 399.9500118 MHz  
Power 48 dB  
continuously on  
WALTZ-16 modulated  
DATA PROCESSING  
Line broadening 1.0 Hz  
FT size 65536  
Total time 1 hr, 12 min, 1 sec

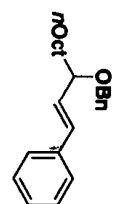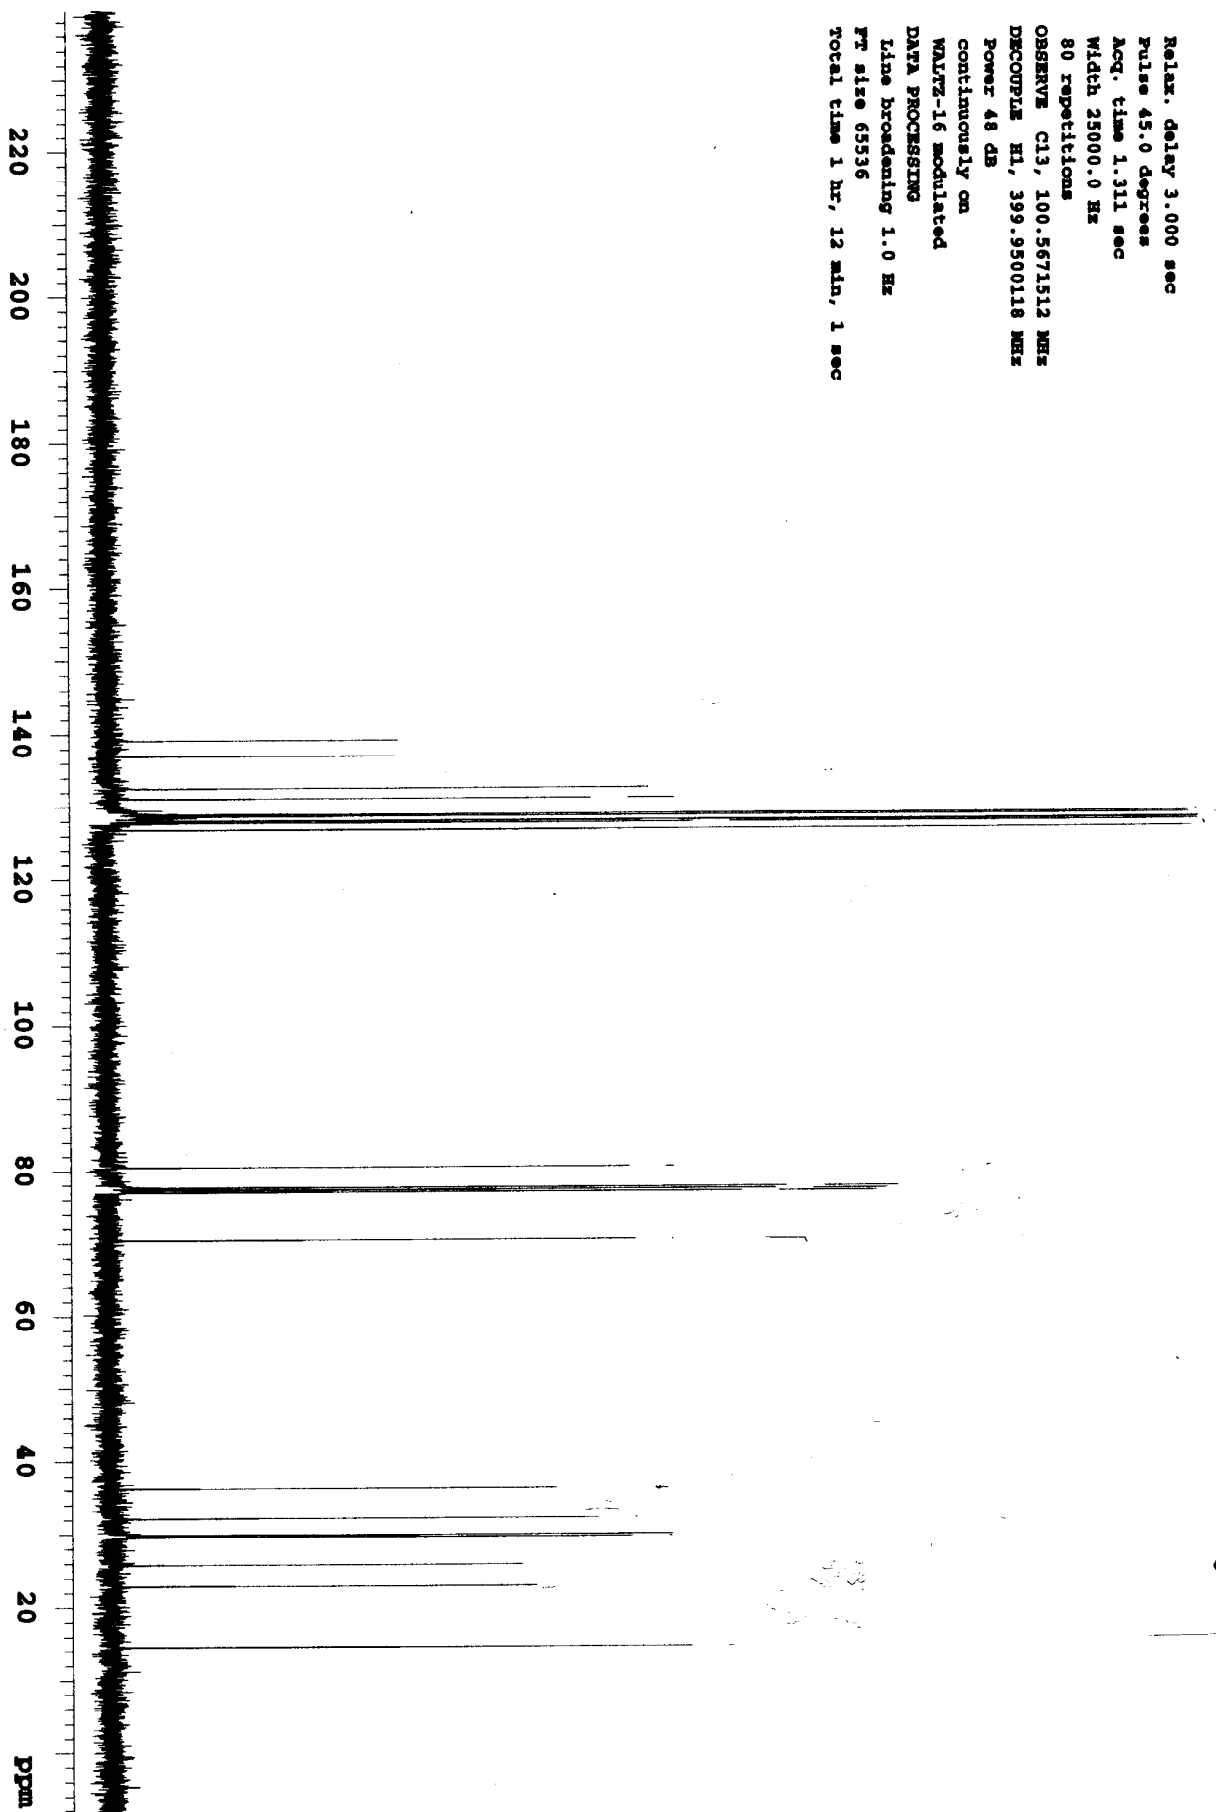

Pulse Sequence: zgpg30  
Solvent: CDCl<sub>3</sub>  
Ambient temperature  
UNIT-400 "400"

Relax. delay 15.000 sec  
Pulse 45.0 degrees  
Acq. time 4.096 sec  
Width 8000.0 Hz  
4 repetitions  
OBSERVE H1, 399.948787 MHz  
DATA PROCESSING  
Line broadening 0.3 Hz  
FT size 65536  
Total time 31 min, 50 sec

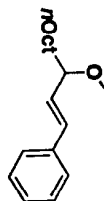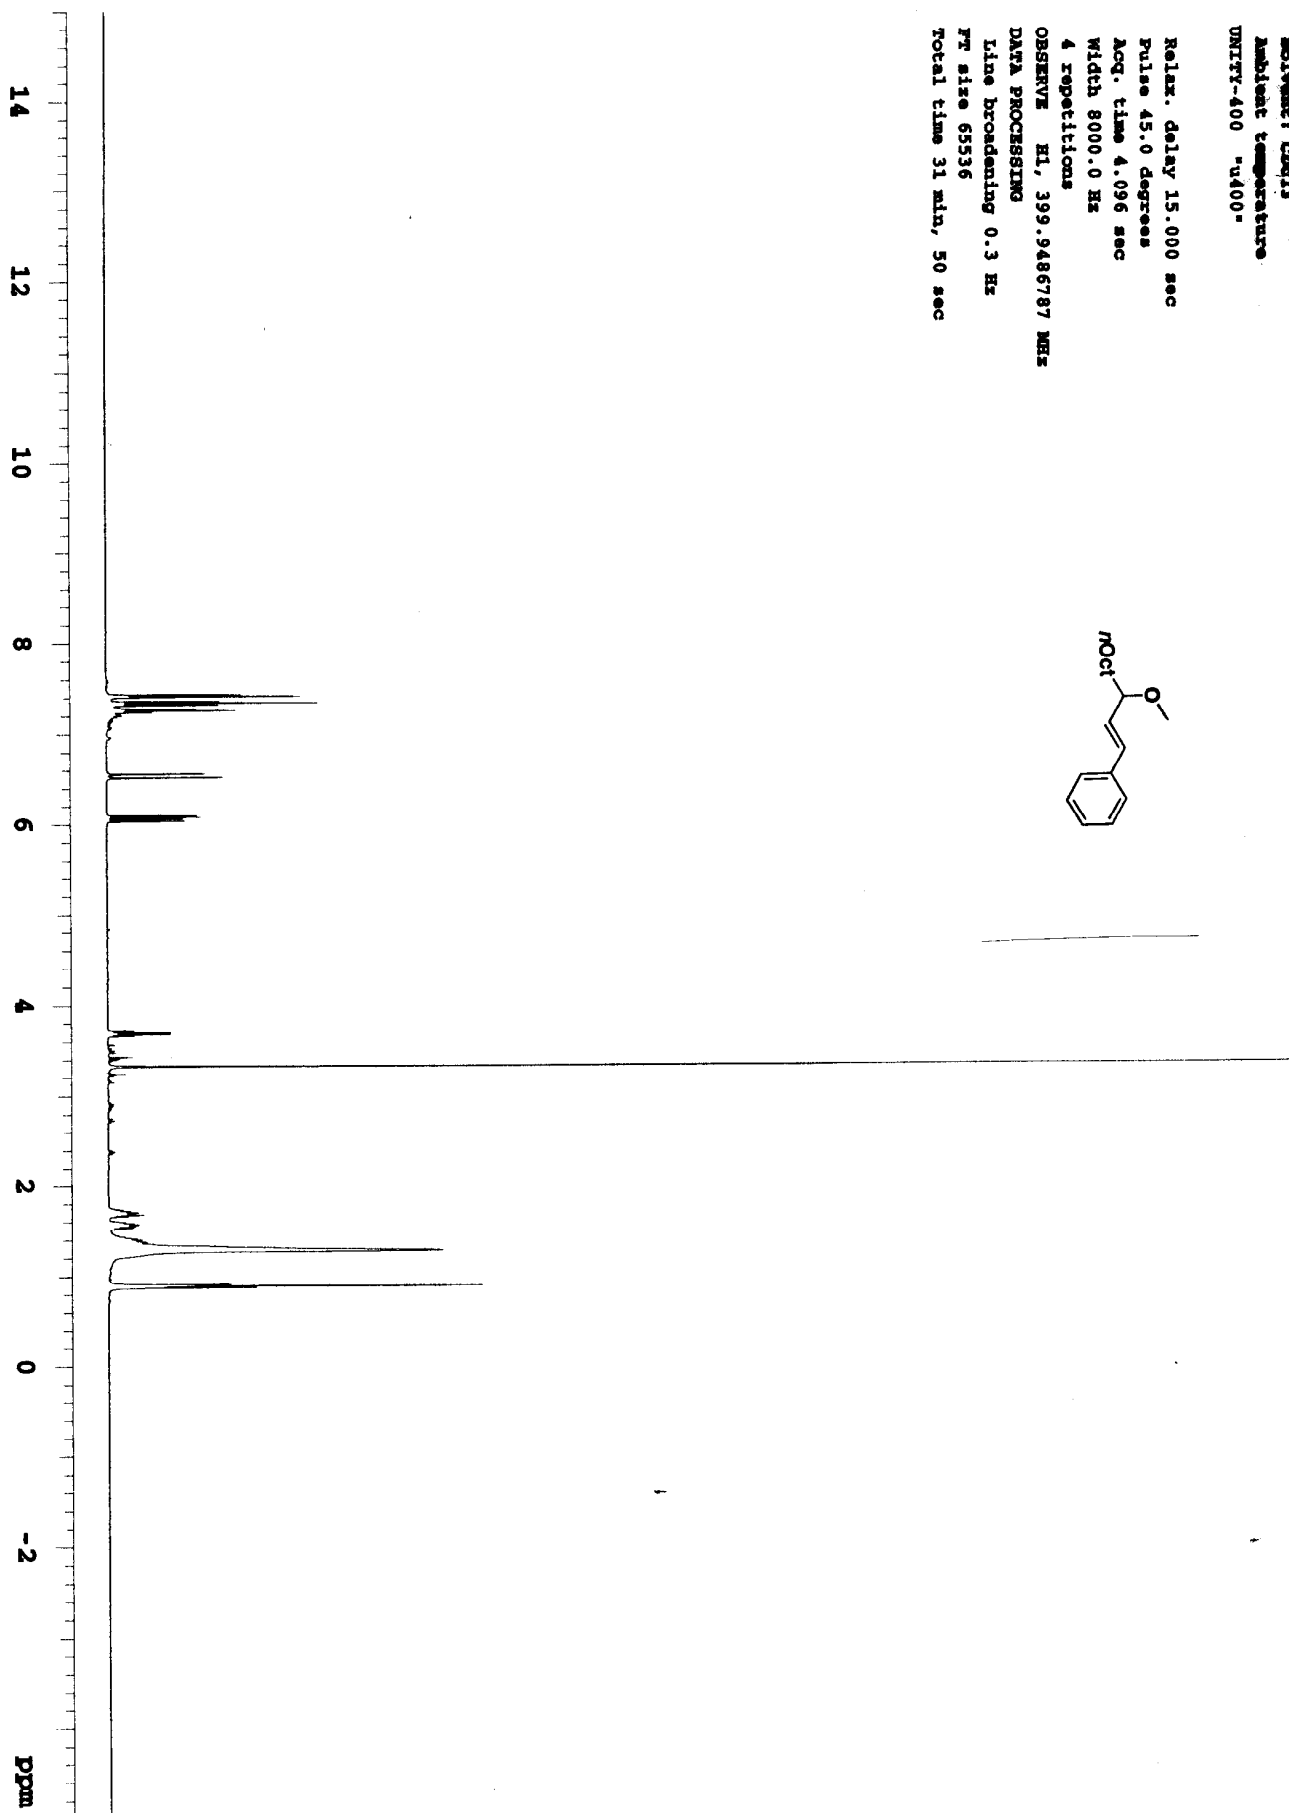



Pulse Sequence: zgpg30  
Solvent: CDCl<sub>3</sub>  
Ambient temperature  
UNIT-400 "u400"

Relax. delay 2.000 sec  
Pulse 45.0 degrees  
Acq. time 1.311 sec  
Width 25000.0 Hz  
16 repetitions  
OBSERVE C13, 100.5671568 MHz  
DECOUPLE H1, 399.9500118 MHz  
Power 48 dB  
continuously on  
WALTZ-16 modulated  
DATA PROCESSING  
Line broadening 1.0 Hz  
FT size 65536  
Total time 55 min, 21 sec

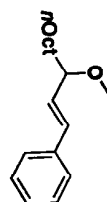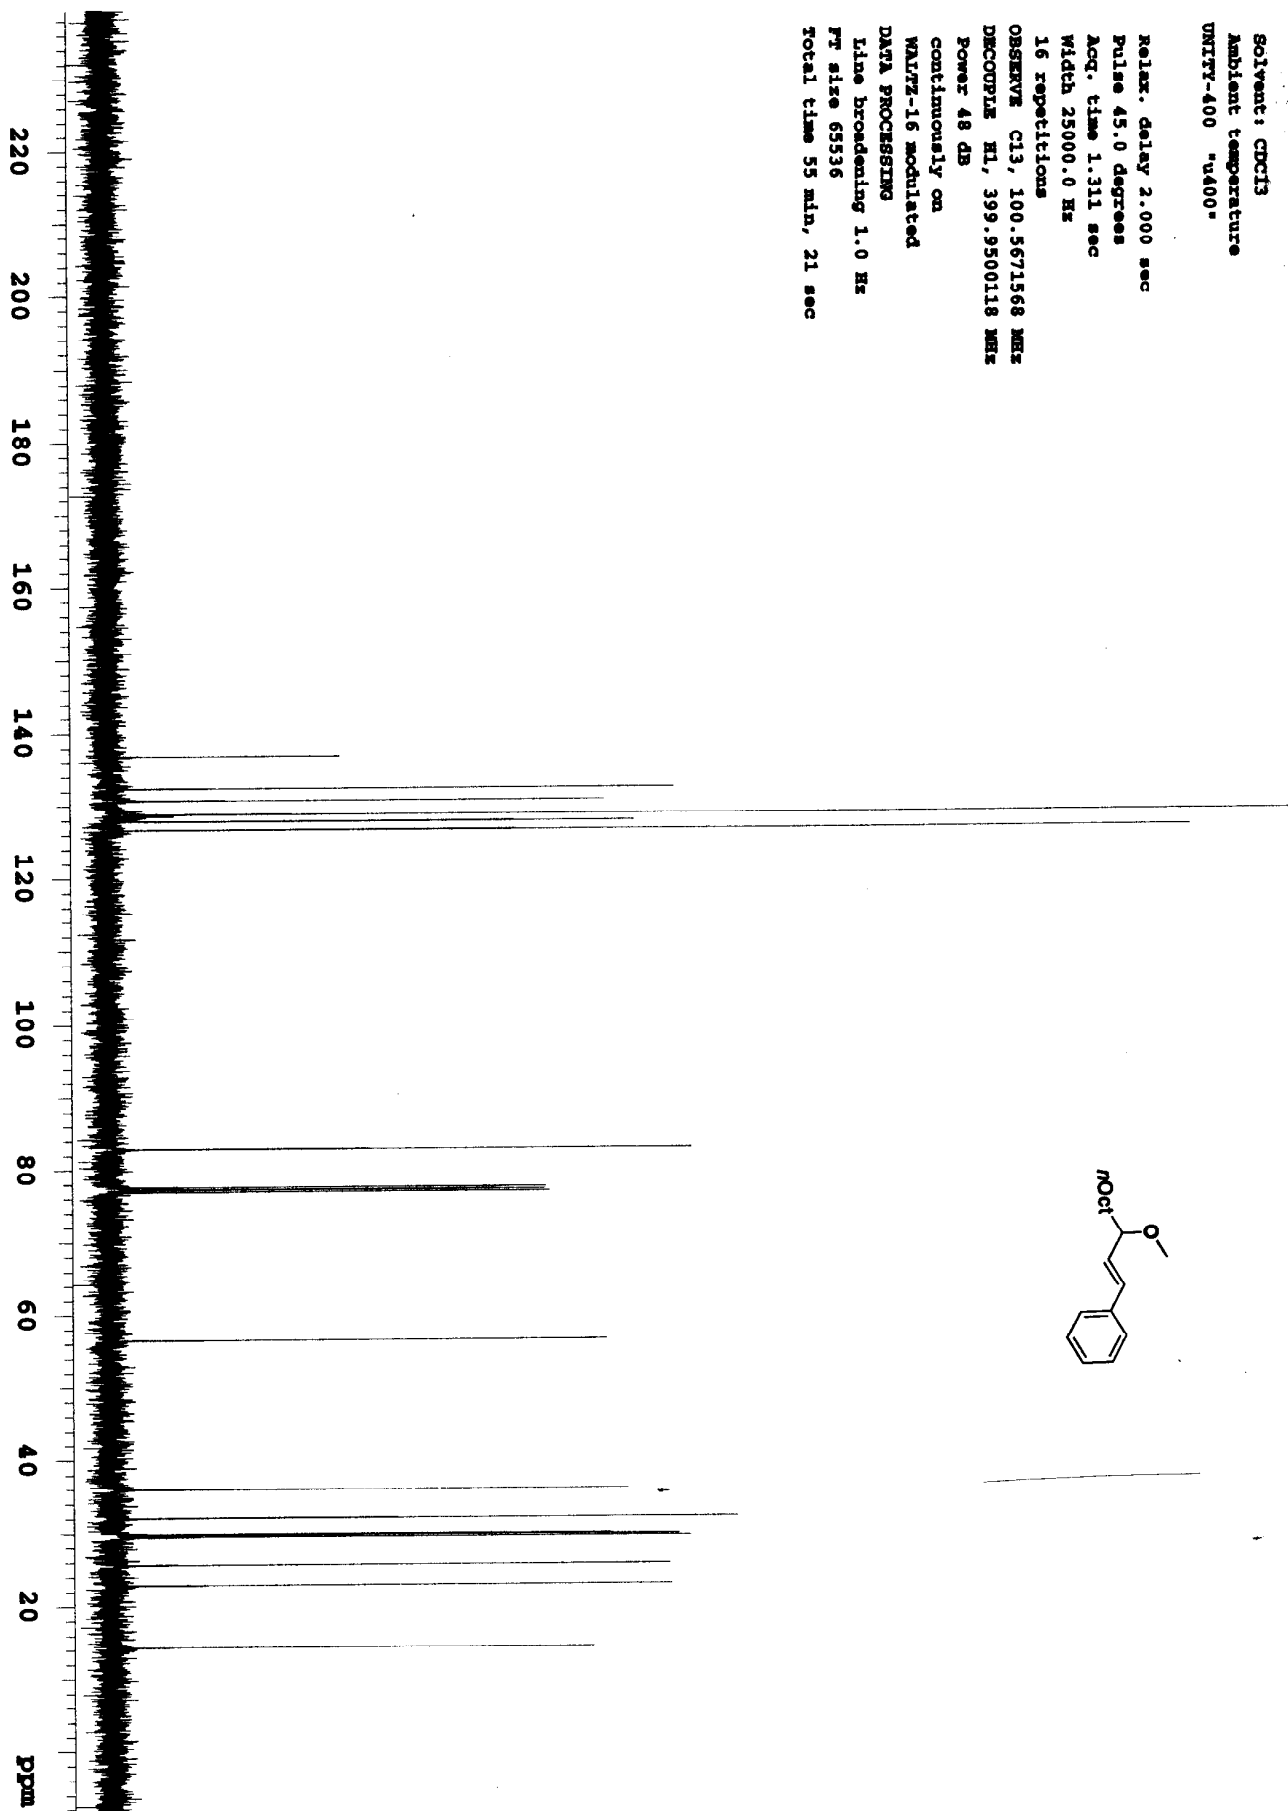

Pulse Sequence: zgpg1  
Solvent: CDCl<sub>3</sub>  
Ambient temperature  
UNIT-400 "400"

Relax. delay 15.000 sec  
Pulse 45.0 degrees  
Acq. time 4.096 sec  
Width 8000.0 Hz  
6 repetitions  
OBSERVE H1, 399.9486787 MHz  
DATA PROCESSING  
Line broadening 0.3 Hz  
FT size 65536  
Total time 31 min, 50 sec

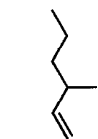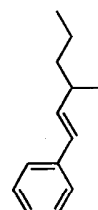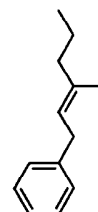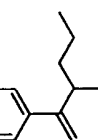

Internal Olefin

Trisubstituted Olefin

Terminal Olefin

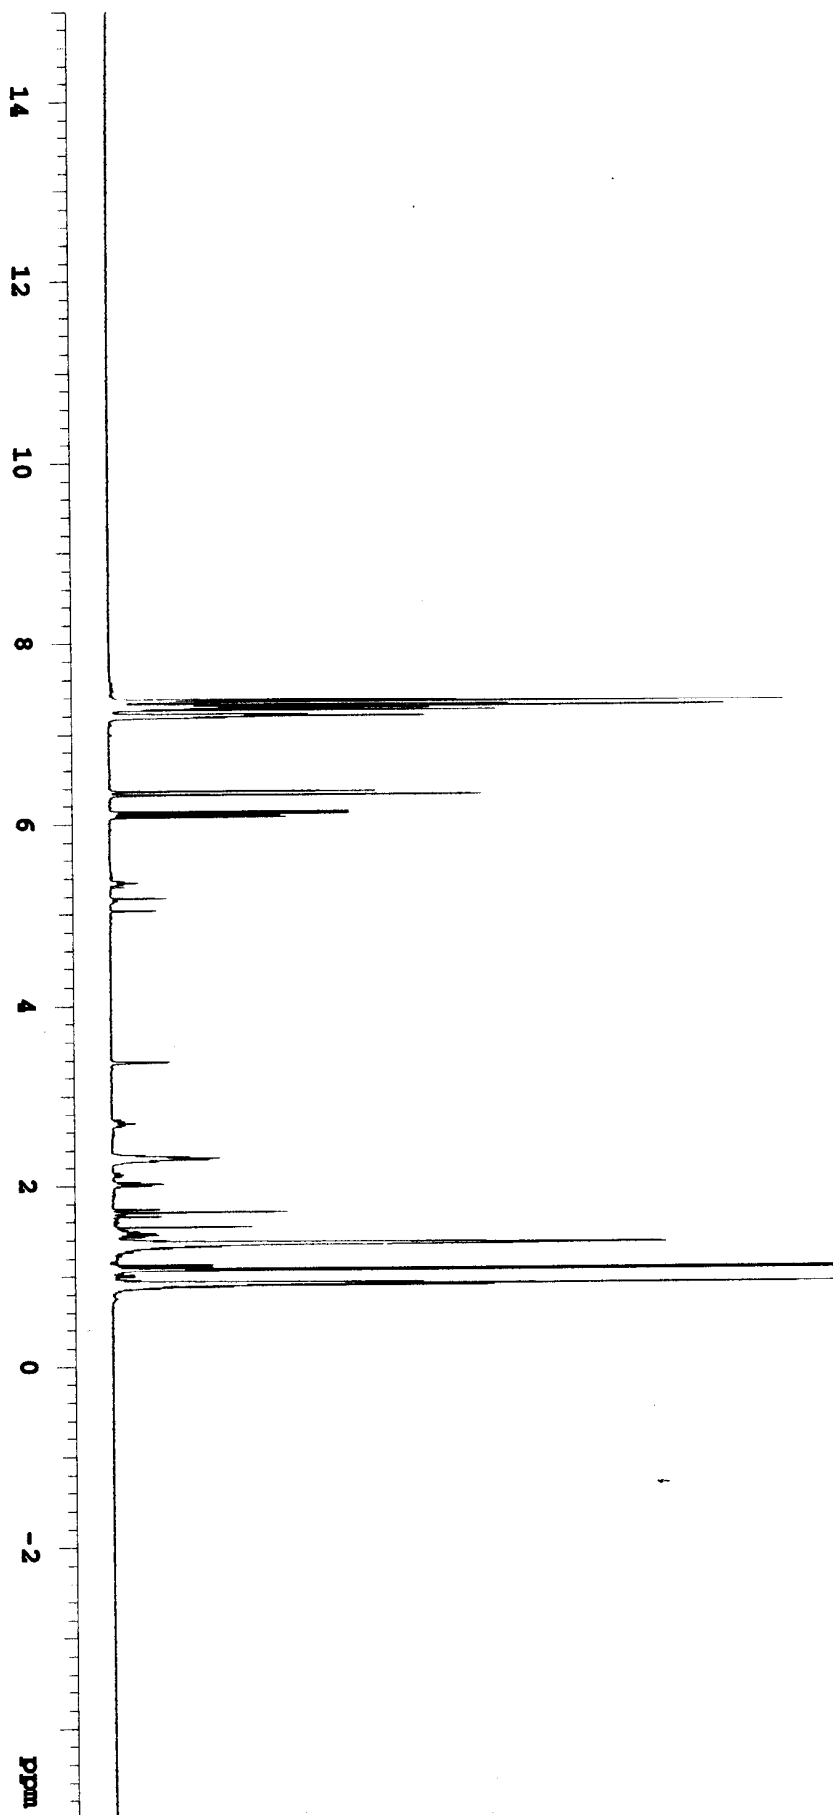

Pulse Sequence: zgpg1  
 Solvent: CDCl<sub>3</sub>  
 Ambient temperature  
 UNIT-400 "u400"

Relax. delay 2.000 sec  
 Pulse 45.0 degrees  
 Acq. time 1.311 sec  
 Width 25000.0 Hz  
 80 repetitions  
 OBSERVE C13, 100.5671512 MHz  
 DECOUPLE H1, 399.9500118 MHz  
 Power 48 dB  
 continuously on  
 WALTZ-16 modulated  
 DATA PROCESSING  
 Line broadening 1.0 Hz  
 FT size 65536  
 Total time 55 min, 21 sec

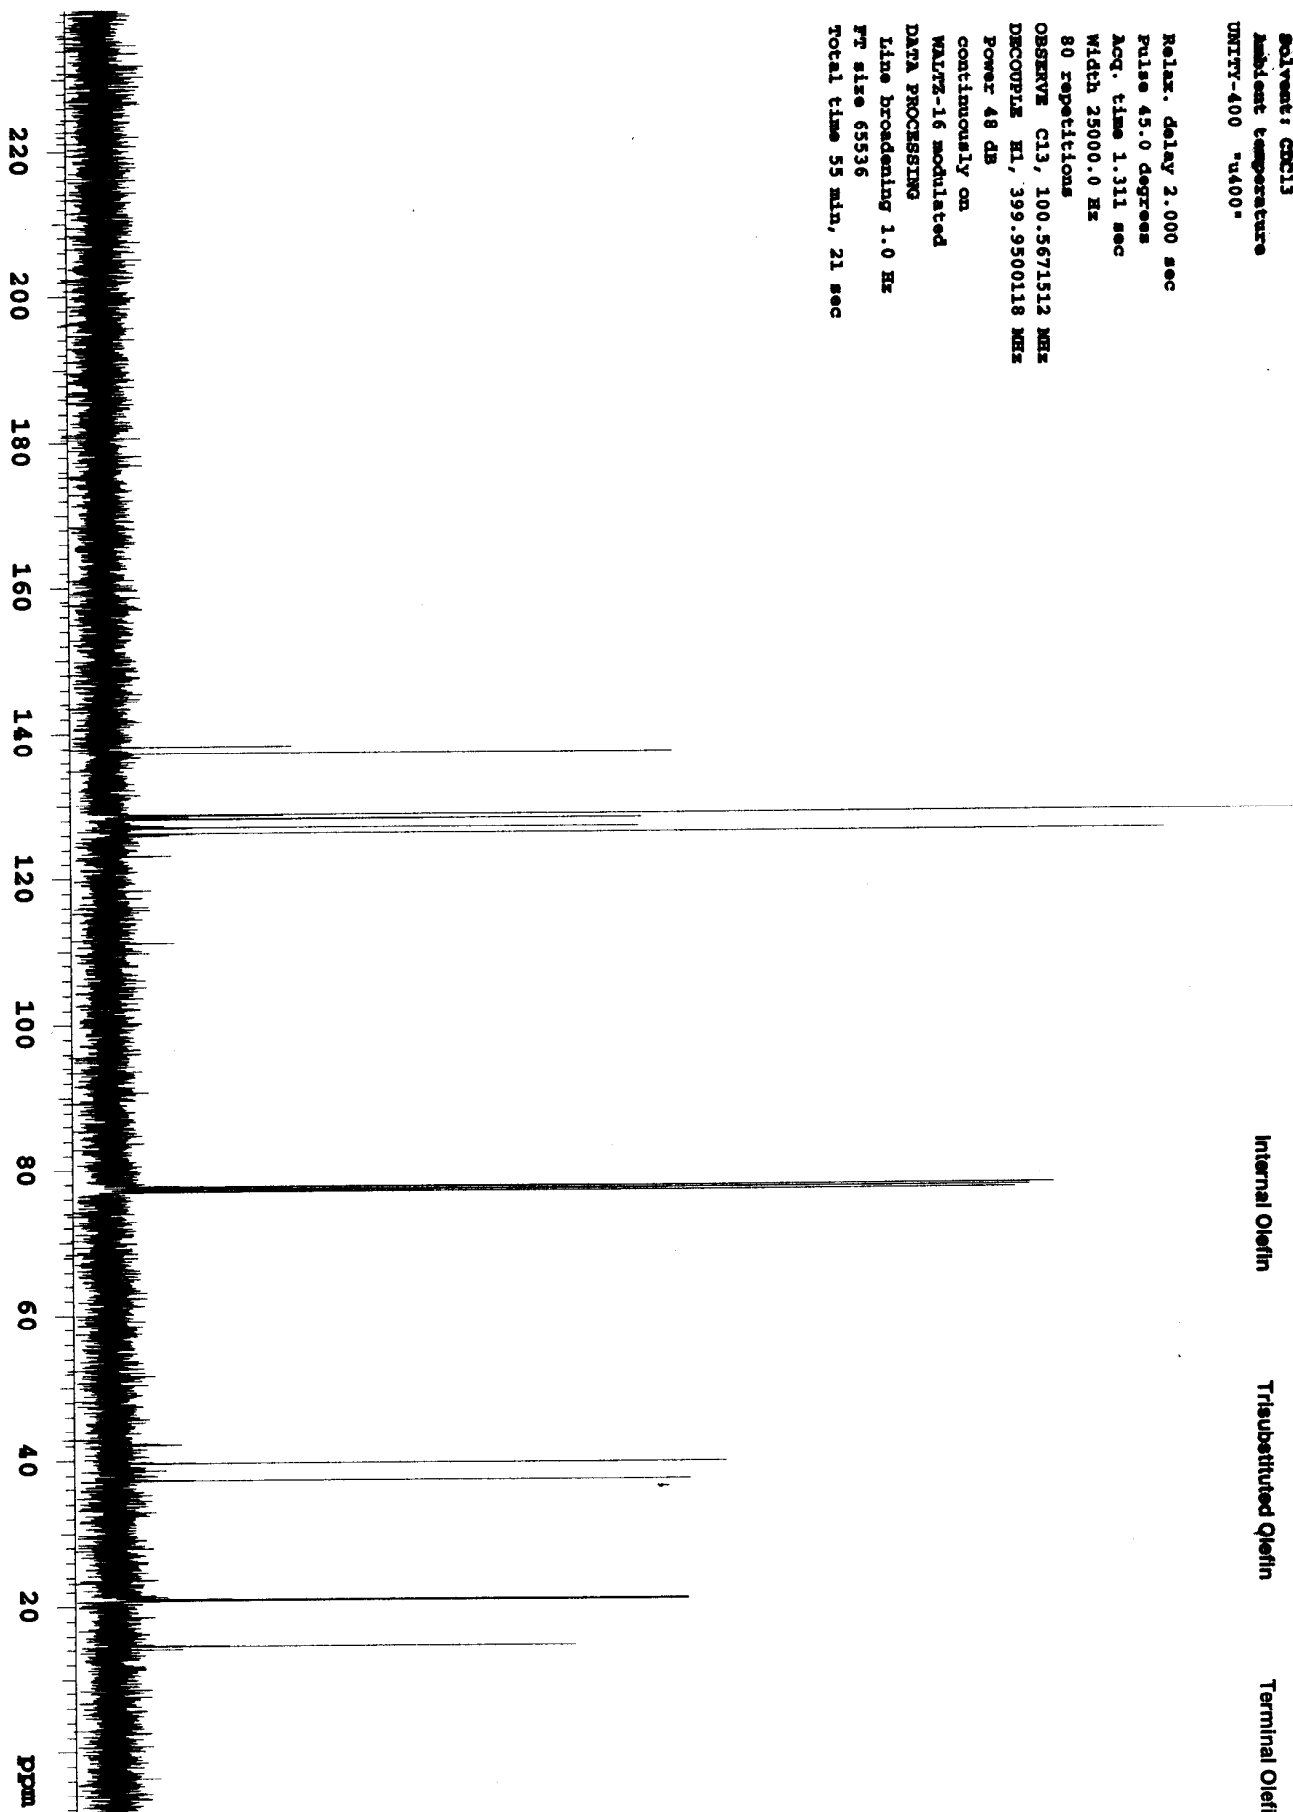

Internal Olefin

Trisubstituted Olefin

Terminal Olefin

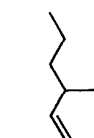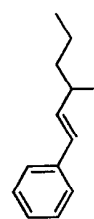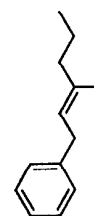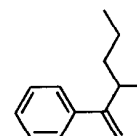

Pulse Sequence: zgpg30  
Solvent: CDCl<sub>3</sub>  
Ambient temperature  
UNIT-400 "u400"

Relax. delay 15.000 sec  
Pulse 45.0 degrees  
Acq. time 4.096 sec  
Width 8000.0 Hz  
12 repetitions  
OBSERVE H1, 399.9486787 MHz  
DATA PROCESSING  
Line broadening 0.3 Hz  
FT size 65536  
Total time 31 min, 50 sec

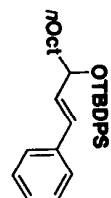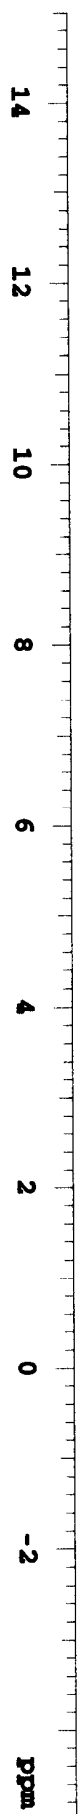

Pulse sequence: zgpg1

Solvent: CDCl<sub>3</sub>

Ambient temperature

UNITY-400 "400"

Relax. delay 2.000 sec

Pulse 45.0 degrees

Acq. time 1.311 sec

Width 25000.0 Hz

184 repetitions

OBSERVE C13, 100.5671545 MHz

DECOUPLE H1, 399.9500118 MHz

Power 48 dB

continuously on

WALTZ-16 modulated

DATA PROCESSING

Line broadening 1.0 Hz

FT size 65536

Total time 55 min, 21 sec

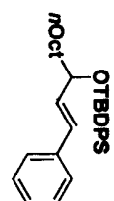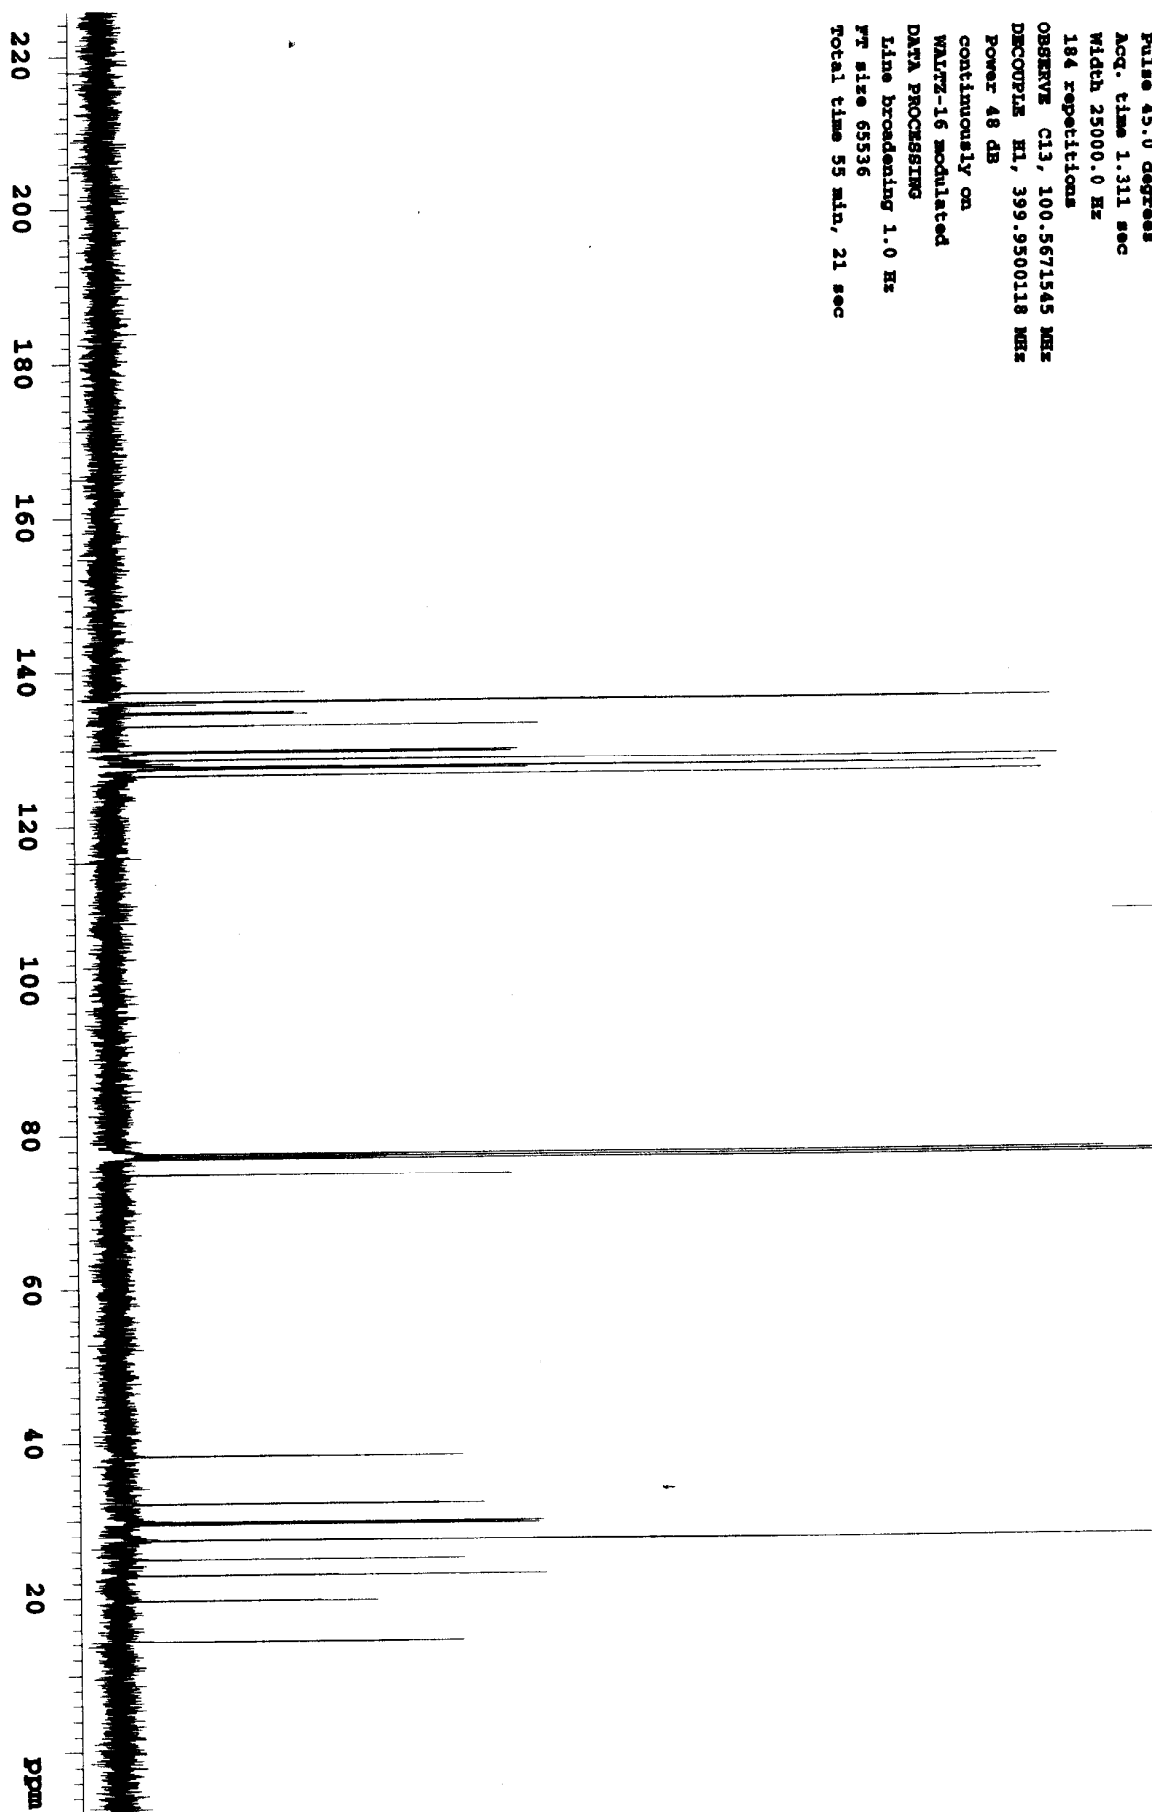

Pulse Sequence: zgpg30  
Solvent: CDCl<sub>3</sub>  
Ambient temperature  
UNIT-400 "u400"

Relax. delay 15.000 sec  
Pulse 45.0 degrees  
Acq. time 4.096 sec  
Width 8000.0 Hz  
6 repetitions  
OBSERVE H1, 399.9486787 MHz  
DATA PROCESSING  
Line broadening 0.3 Hz  
FT size 65536  
Total time 31 min, 50 sec

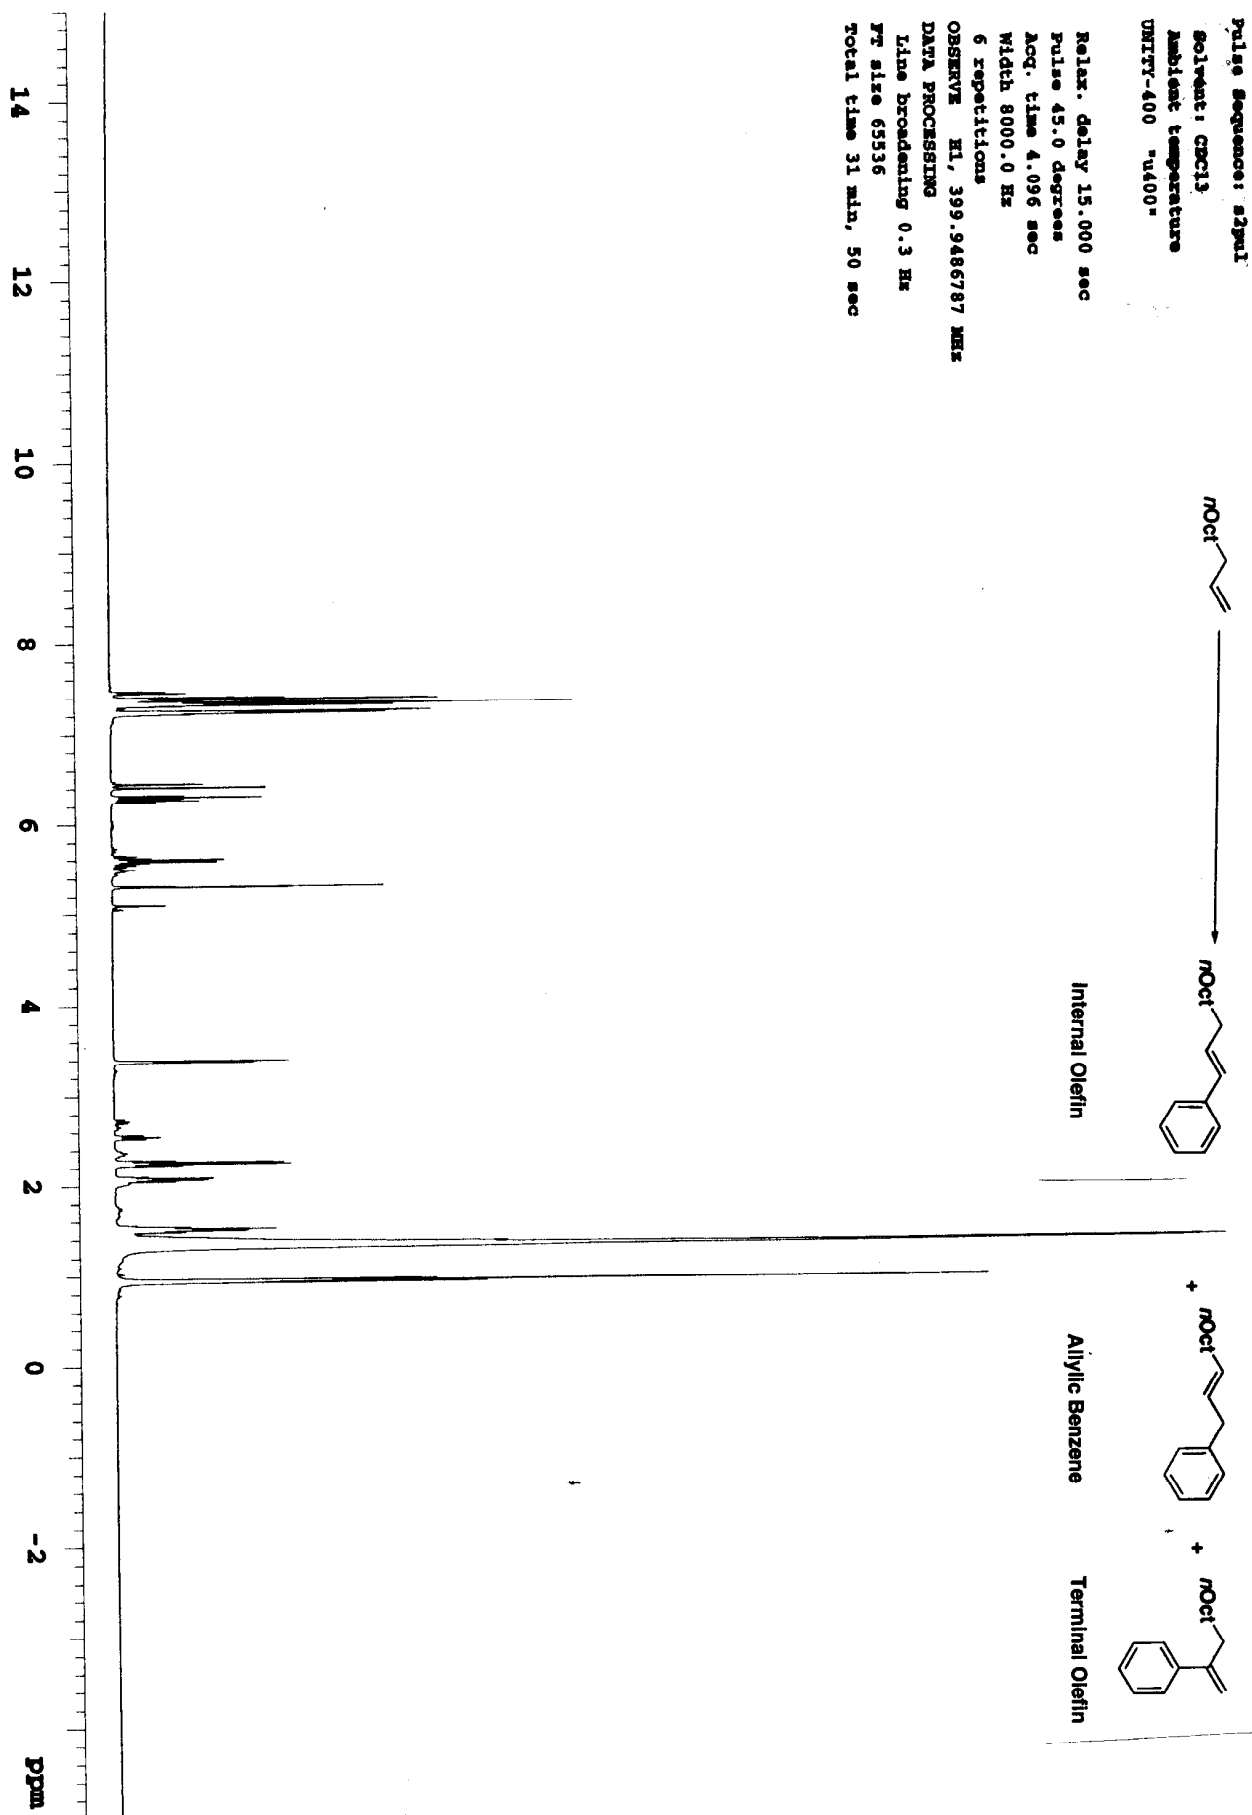

Pulse Sequence: zgpg30  
Solvent: CDCl<sub>3</sub>  
Ambient temperature  
UNIT-400 "u400"

Relax. delay 15.000 sec  
Pulse 45.0 degrees  
Acq. time 4.096 sec  
Width 8000.0 Hz

4 repetitions

OBSERVE H1, 399.948787 MHz

DATA PROCESSING

Line broadening 0.3 Hz

FT size 65536

Total time 31 min, 50 sec

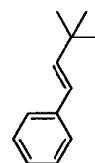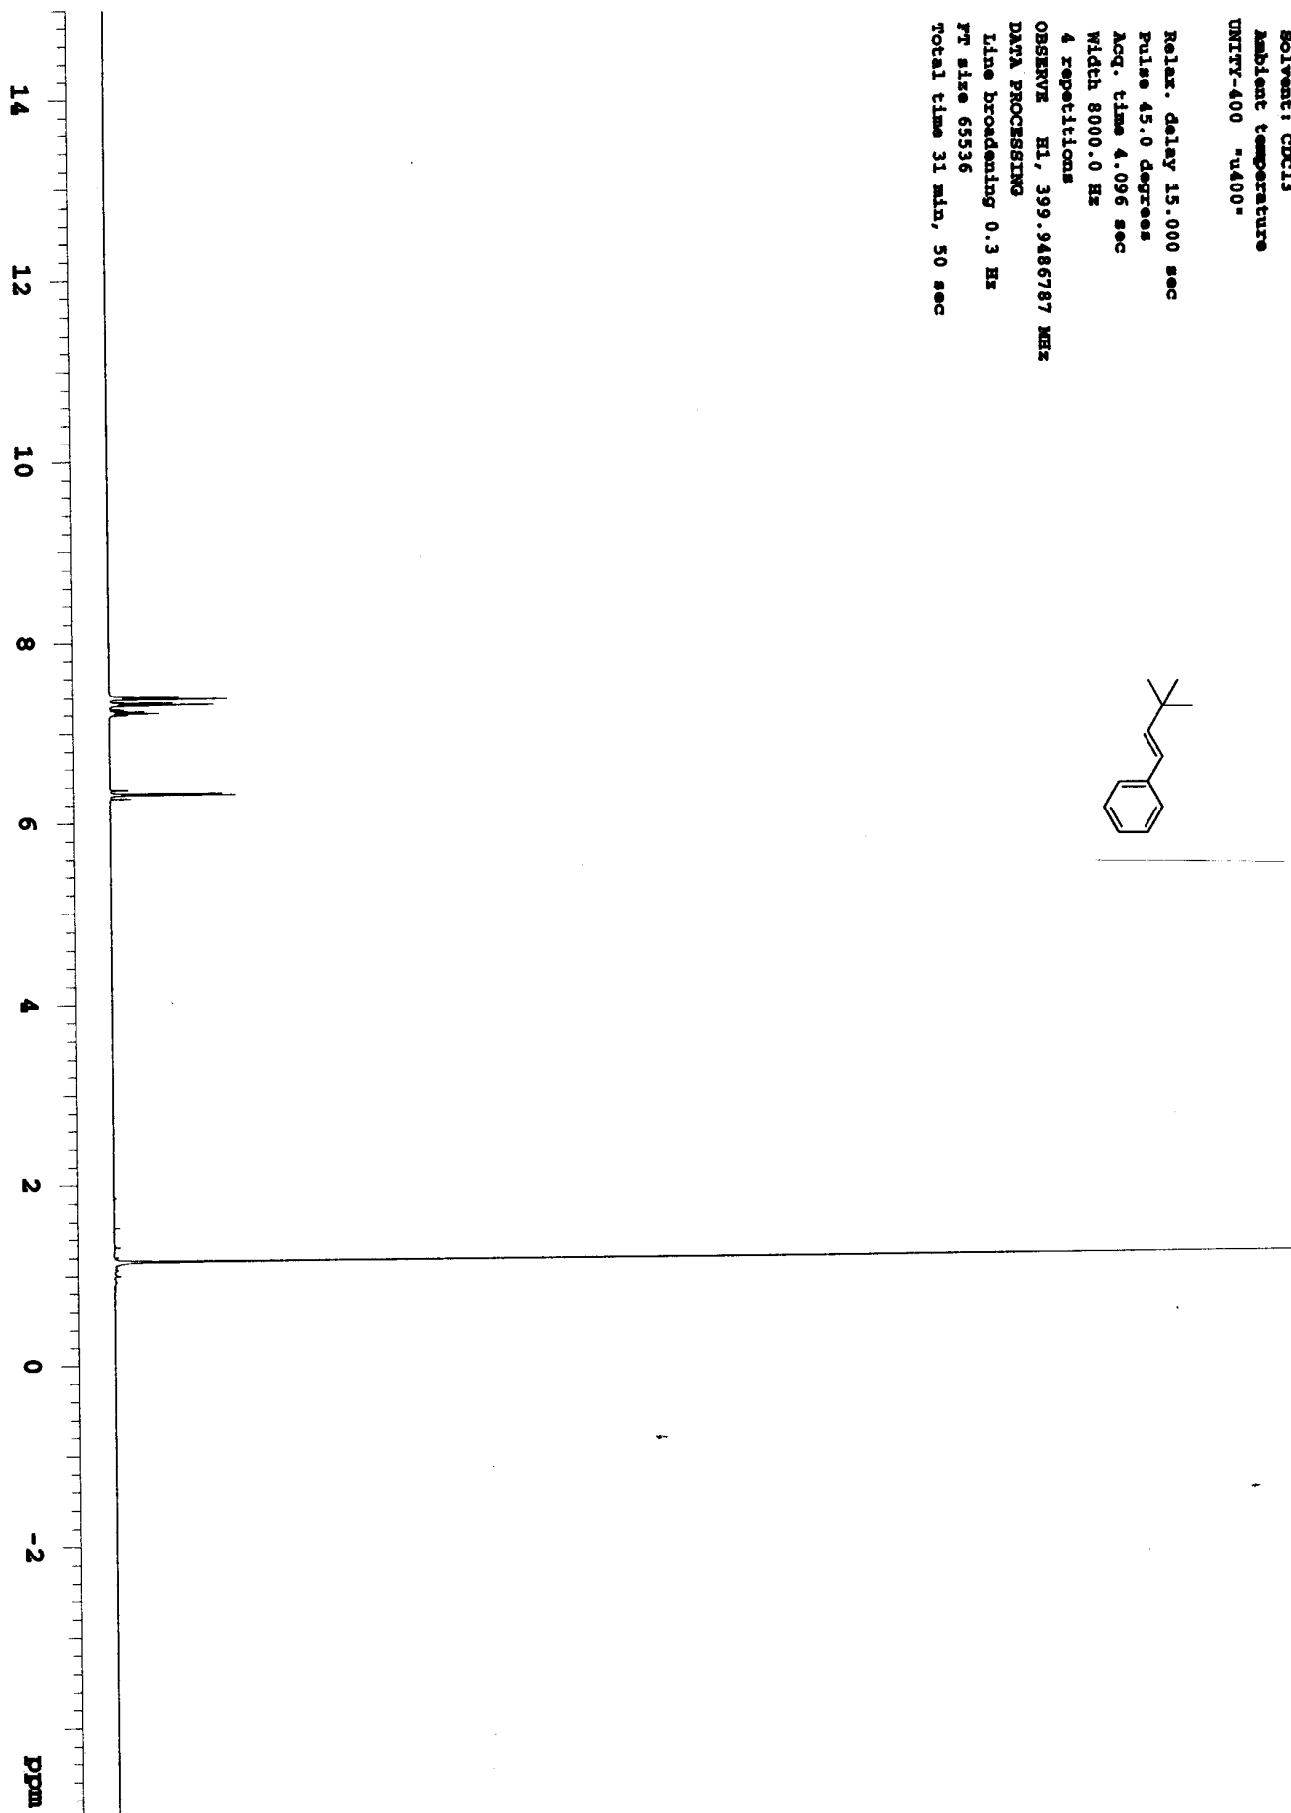

Pulse Sequence: zgpg1  
Solvent: CDCl<sub>3</sub>  
Ambient temperature  
UNITY-400 "u400"

Relax. delay 2.000 sec  
Pulse 45.0 degrees  
Acq. time 1.311 sec  
Width 25000.0 Hz  
40 repetitions  
OBSERVE C13, 100.5671568 MHz  
DECOUPLE H1, 399.9500118 MHz  
Power 48 dB  
continuously on  
WALTZ-16 modulated  
DATA PROCESSING  
Line broadening 1.0 Hz  
FT size 65536  
Total time 55 min, 21 sec

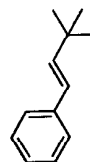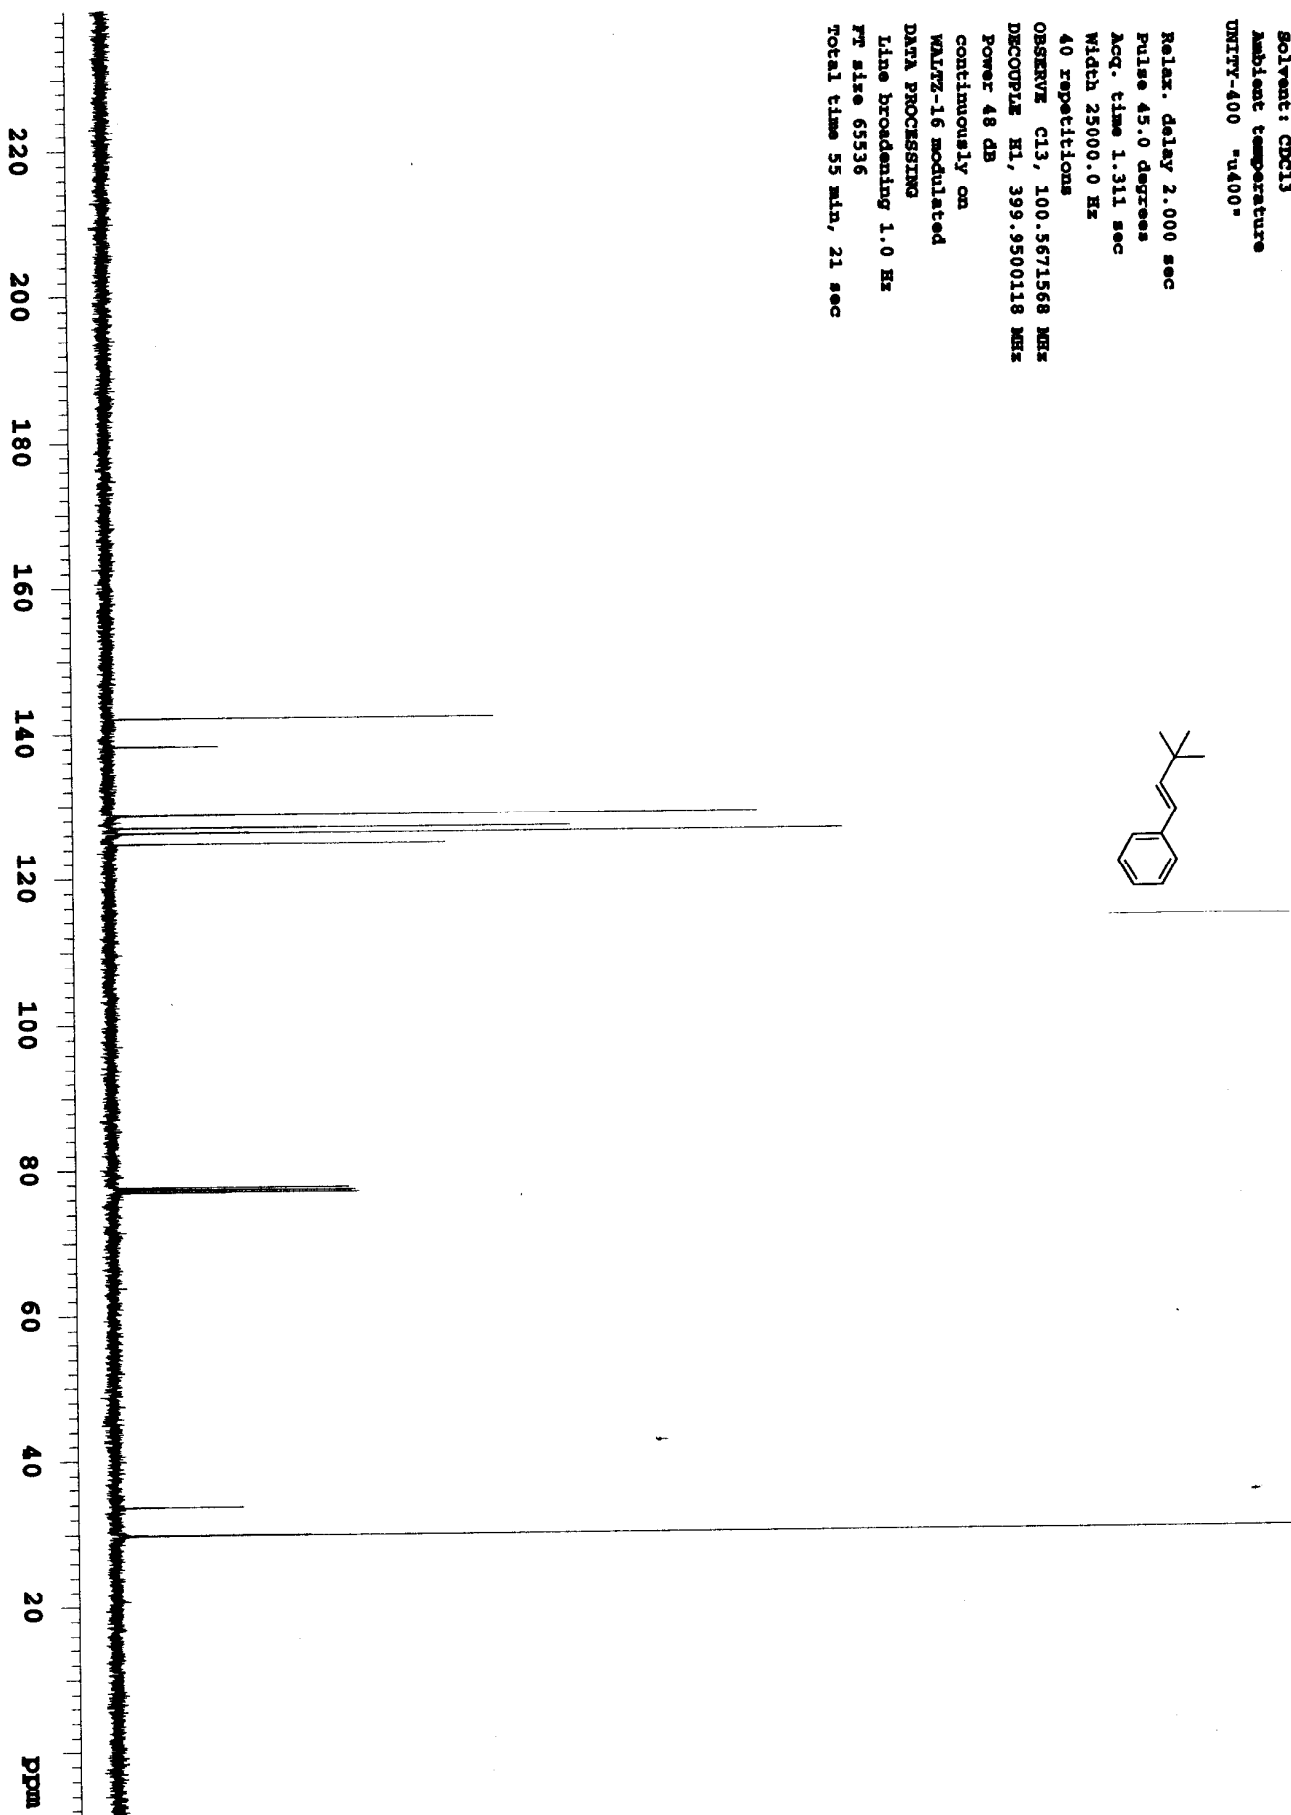

Supplement: Supplementary file 1 [file 4749979]
